# Supplementary material for: Charring-induced morphological changes of Chinese “Five Grains”: An experimental study
Source: Front Plant Sci. 2023 Feb 3;14:1063617. doi: 10.3389/fpls.2023.1063617 (PMC9935936; doi:10.3389/fpls.2023.1063617)
Supplement: Supplementary Table 1 — Average measurement results of the samples. [file Table_1.xlsx]

## Sheet: Sheet1
Suppl. Table 1. Average measurement results of the samples. (N=Number of measurable seeds)
		Weight(g)	Length(mm)	Width(mm)	Thickness(mm)	L/W ratio	Number
Unheated	Rice	0.023	4.939	2.942	2.168	1.683	N=420
	Broomcorn Millet	0.006	2.108	2.28	1.715	0.925	N=420
	Foxtail Millet	0.003	1.456	1.775	1.332	0.821	N=420
	Wheat	0.048	6.667	3.541	3.322	1.894	N=420
	Soybean	0.178	6.849	6.653	6.011	1.031	N=420
Heated	Rice	0.013	5.739	3.066	2.576	1.741	N=270
	Broomcorn Millet	0.004	2.202	2.762	1.993	0.811	N=416
	Foxtail Millet	0.002	1.495	2.251	1.46	0.677	N=416
	Wheat	0.029	5.53	4.286	3.643	1.304	N=418
	Soybean	0.118	7.424	6.328	5.849	1.178	N=402
