# Supplementary material for: Charring-induced morphological changes of Chinese “Five Grains”: An experimental study
Source: Front Plant Sci. 2023 Feb 3;14:1063617. doi: 10.3389/fpls.2023.1063617 (PMC9935936; doi:10.3389/fpls.2023.1063617)
Supplement: Supplementary Table 2 — Original dataset. [file Table_2.xlsx]

## Sheet: Broomcorn Millet
Time (h)	Temperature (℃)	Before Carbonization					After Carbonization
		Length (mm)	Width (mm)	Thickness (mm)	L/W ratio	Volume (mm³)	Length (mm)	Width (mm)	Thickness (mm)	L/W ratio	Volume (mm³)	Length variation	Width variation	Thickness variation	L/W ratio variation	Volume variation	Shrinkage of length	Shrinkage of Width	Shrinkage of Thickness
1	240	2.02	2.35	1.77	0.859574	8.40219	2	2.24	1.64	0.892857	7.3472	-0.02	-0.11	-0.13	0.0332827	-1.05499	-0.00990099	-0.0468085	-0.0734463
1	240	2.04	2.26	1.83	0.902655	8.43703	1.99	2.19	1.64	0.908676	7.14728	-0.05	-0.07	-0.19	0.00602093	-1.28975	-0.0245098	-0.0309735	-0.103825
1	240	2.01	2.22	1.77	0.905405	7.89809	2.23	2.21	1.63	1.00905	8.03313	0.22	-0.01	-0.14	0.103644	0.135035	0.109453	-0.0045045	-0.079096
1	240	1.99	2.26	1.68	0.880531	7.55563	1.87	2.1	1.68	0.890476	6.59736	-0.12	-0.16	0	0.00994522	-0.958272	-0.0603015	-0.0707965	0
1	240	2.03	2.33	1.81	0.871245	8.56112	2.03	2.2	1.58	0.922727	7.05628	0	-0.13	-0.23	0.0514826	-1.50484	0	-0.055794	-0.127072
1	240	2.16	2.15	1.61	1.00465	7.47684	2.15	2.21	1.68	0.972851	7.98252	-0.01	0.06	0.07	-0.0318005	0.50568	-0.00462963	0.027907	0.0434783
1	240	2.07	2.26	1.72	0.915929	8.0465	1.87	2.22	1.64	0.842342	6.8083	-0.2	-0.04	-0.08	-0.0735869	-1.23821	-0.0966184	-0.0176991	-0.0465116
1	240	1.95	2.35	1.75	0.829787	8.01938	2.02	2.24	1.64	0.901786	7.42067	0.07	-0.11	-0.11	0.0719985	-0.598703	0.0358974	-0.0468085	-0.0628571
1	240	1.98	2.16	1.68	0.916667	7.18502	1.95	2.24	1.66	0.870536	7.25088	-0.03	0.08	-0.02	-0.046131	0.065856	-0.0151515	0.037037	-0.0119048
1	240	2.04	2.25	1.64	0.906667	7.5276	1.98	2.24	1.73	0.883929	7.6729	-0.06	-0.01	0.09	-0.0227381	0.145296	-0.0294118	-0.00444444	0.054878
1	240	2.02	2.19	1.7	0.922374	7.52046	2.09	2.17	1.65	0.963134	7.48324	0.07	-0.02	-0.05	0.0407592	-0.037215	0.0346535	-0.00913242	-0.0294118
1	240	2.02	2.36	1.77	0.855932	8.43794	2.05	2.13	1.56	0.962441	6.81174	0.03	-0.23	-0.21	0.106509	-1.6262	0.0148515	-0.0974576	-0.118644
1	240	2.01	2.32	1.73	0.866379	8.06734	1.88	2.11	1.62	0.890995	6.42622	-0.13	-0.21	-0.11	0.024616	-1.64112	-0.0646766	-0.0905172	-0.0635838
1	240	1.98	2.31	1.72	0.857143	7.86694	1.96	2.3	1.76	0.852174	7.93408	-0.02	-0.01	0.04	-0.00496894	0.067144	-0.010101	-0.004329	0.0232558
1	240	2.01	2.28	1.7	0.881579	7.79076	1.96	2.17	1.71	0.903226	7.27297	-0.05	-0.11	0.01	0.0216469	-0.517788	-0.0248756	-0.0482456	0.00588235
1	240	2.07	2.23	1.74	0.928251	8.03201	2.07	2.02	1.41	1.02475	5.89577	0	-0.21	-0.33	0.0965014	-2.13624	0	-0.0941704	-0.189655
1	240	2.27	2.42	1.68	0.938017	9.22891	2.12	2.14	1.62	0.990654	7.34962	-0.15	-0.28	-0.06	0.0526377	-1.8793	-0.0660793	-0.115702	-0.0357143
1	240	2.32	2.11	1.43	1.09953	7.00014	1.97	2.29	1.73	0.860262	7.80455	-0.35	0.18	0.3	-0.239264	0.804413	-0.150862	0.0853081	0.20979
1	240	1.95	2.22	1.78	0.878378	7.70562	1.77	2.24	1.68	0.790179	6.66086	-0.18	0.02	-0.1	-0.0881998	-1.04476	-0.0923077	0.00900901	-0.0561798
1	240	2.3	2.06	1.69	1.1165	8.00722	2.21	2.4	1.62	0.920833	8.59248	-0.09	0.34	-0.07	-0.195672	0.58526	-0.0391304	0.165049	-0.0414201
3	240	1.95	2.35	1.83	0.829787	8.38598	2.2	2.38	1.78	0.92437	9.32008	0.25	0.03	-0.05	0.0945825	0.934105	0.128205	0.012766	-0.0273224
3	240	2.15	2.35	1.69	0.914894	8.53872	2.17	2.56	2.03	0.847656	11.2771	0.02	0.21	0.34	-0.0672374	2.73833	0.00930233	0.0893617	0.201183
3	240	2.21	2.3	1.69	0.96087	8.59027	2	2.43	2.09	0.823045	10.1574	-0.21	0.13	0.4	-0.137824	1.56713	-0.0950226	0.0565217	0.236686
3	240	2.26	2.26	1.75	1	8.9383	2.39	2.25	1.94	1.06222	10.4324	0.13	-0.01	0.19	0.0622222	1.49405	0.0575221	-0.00442478	0.108571
3	240	2.07	2.37	1.81	0.873418	8.87968	2.12	2.3	1.84	0.921739	8.97184	0.05	-0.07	0.03	0.0483214	0.092161	0.0241546	-0.0295359	0.0165746
3	240	2.08	2.2	1.66	0.945455	7.59616	2.17	2.62	1.89	0.828244	10.7454	0.09	0.42	0.23	-0.11721	3.14925	0.0432692	0.190909	0.138554
3	240	2.06	2.39	1.75	0.861925	8.61595	2.27	2.39	1.8	0.949791	9.76554	0.21	0	0.05	0.0878661	1.14959	0.101942	0	0.0285714
3	240	2.11	2.28	1.72	0.925439	8.27458	1.98	2.29	1.74	0.864629	7.88951	-0.13	0.01	0.02	-0.0608098	-0.385068	-0.0616114	0.00438596	0.0116279
3	240	2.02	2.29	1.83	0.882096	8.46521	2.23	1.95	1.8	1.14359	7.8273	0.21	-0.34	-0.03	0.261494	-0.637914	0.10396	-0.148472	-0.0163934
3	240	2.42	2.3	1.76	1.05217	9.79616	2.07	2.3	1.71	0.9	8.14131	-0.35	0	-0.05	-0.152174	-1.65485	-0.144628	0	-0.0284091
3	240	2.05	2.34	1.73	0.876068	8.29881	2	2.48	1.74	0.806452	8.6304	-0.05	0.14	0.01	-0.0696168	0.33159	-0.0243902	0.0598291	0.00578035
3	240	2.13	2.26	1.63	0.942478	7.84649	2.22	2.23	1.82	0.995516	9.01009	0.09	-0.03	0.19	0.0530378	1.1636	0.0422535	-0.0132743	0.116564
3	240	2.45	2.3	1.68	1.06522	9.4668	2.16	2.34	1.97	0.923077	9.95717	-0.29	0.04	0.29	-0.14214	0.490368	-0.118367	0.0173913	0.172619
3	240	2.4	2.35	1.73	1.02128	9.7572	2.15	2.3	2.11	0.934783	10.4339	-0.25	-0.05	0.38	-0.086494	0.67675	-0.104167	-0.0212766	0.219653
3	240	2.15	2.35	1.78	0.914894	8.99345	2.26	2.58	1.91	0.875969	11.1368	0.11	0.23	0.13	-0.0389246	2.14338	0.0511628	0.0978723	0.0730337
3	240	2.28	2.34	1.68	0.974359	8.96314	2.23	2.27	1.91	0.982379	9.66861	-0.05	-0.07	0.23	0.00801988	0.705475	-0.0219298	-0.0299145	0.136905
3	240	2.37	2.32	1.73	1.02155	9.51223	1.95	2.44	1.82	0.79918	8.65956	-0.42	0.12	0.09	-0.222371	-0.852672	-0.177215	0.0517241	0.0520231
3	240	2.19	2.21	1.65	0.99095	7.98583	2.2	2.36	1.76	0.932203	9.13792	0.01	0.15	0.11	-0.0587468	1.15209	0.00456621	0.0678733	0.0666667
3	240	1.93	2.28	1.7	0.846491	7.48068	2.42	2.35	1.85	1.02979	10.521	0.49	0.07	0.15	0.183296	3.04027	0.253886	0.0307018	0.0882353
3	240	2.54	2.41	1.76	1.05394	10.7737	1.93	2.38	1.72	0.810924	7.90065	-0.61	-0.03	-0.04	-0.243018	-2.87302	-0.240157	-0.0124481	-0.0227273
5	240	2.02	2.2	1.62	0.918182	7.19928	1.95	2.3	1.76	0.847826	7.8936	-0.07	0.1	0.14	-0.0703557	0.69432	-0.0346535	0.0454545	0.0864198
5	240	2.08	2.31	1.72	0.900433	8.26426	1.95	2.35	1.87	0.829787	8.56928	-0.13	0.04	0.15	-0.0706457	0.305019	-0.0625	0.017316	0.0872093
5	240	2.21	2.22	1.65	0.995495	8.09523	2.06	2.32	1.82	0.887931	8.69814	-0.15	0.1	0.17	-0.107564	0.602914	-0.0678733	0.045045	0.10303
5	240	2.04	2.29	1.73	0.89083	8.08187	1.86	2.46	1.68	0.756098	7.68701	-0.18	0.17	-0.05	-0.134732	-0.39486	-0.0882353	0.0742358	-0.0289017
5	240	2.02	2.3	1.64	0.878261	7.61944	2.1	2.43	1.87	0.864198	9.54261	0.08	0.13	0.23	-0.0140633	1.92317	0.039604	0.0565217	0.140244
5	240	2.09	2.32	1.7	0.900862	8.24296	2.12	2.37	1.77	0.894515	8.89319	0.03	0.05	0.07	-0.0063473	0.650228	0.0143541	0.0215517	0.0411765
5	240	2.25	2.1	1.74	1.07143	8.2215	1.87	2.31	1.77	0.809524	7.64587	-0.38	0.21	0.03	-0.261905	-0.575631	-0.168889	0.1	0.0172414
5	240	2.06	2.36	1.71	0.872881	8.31334	1.92	2.31	1.97	0.831169	8.73734	-0.14	-0.05	0.26	-0.0417125	0.424008	-0.0679612	-0.0211864	0.152047
5	240	2.18	2.22	1.68	0.981982	8.13053	2	2.42	1.75	0.826446	8.47	-0.18	0.2	0.07	-0.155536	0.339472	-0.0825688	0.0900901	0.0416667
5	240	2.19	2.34	1.73	0.935897	8.86556	2.4	2.55	1.97	0.941176	12.0564	0.21	0.21	0.24	0.00527903	3.19084	0.0958904	0.0897436	0.138728
5	240	2.03	2.38	1.76	0.852941	8.50326	2.06	2.32	1.87	0.887931	8.9371	0.03	-0.06	0.11	0.0349899	0.43384	0.0147783	-0.0252101	0.0625
5	240	2.1	2.24	1.69	0.9375	7.94976	2.06	2.39	1.87	0.861925	9.20676	-0.04	0.15	0.18	-0.0755753	1.257	-0.0190476	0.0669643	0.106509
5	240	1.96	2.26	1.81	0.867257	8.01758	2.28	2.38	1.98	0.957983	10.7443	0.32	0.12	0.17	0.0907266	2.7267	0.163265	0.0530973	0.0939227
5	240	2.08	2.36	1.65	0.881356	8.09952	2	2.42	1.78	0.826446	8.6152	-0.08	0.06	0.13	-0.0549097	0.51568	-0.0384615	0.0254237	0.0787879
5	240	2.49	2.32	1.72	1.07328	9.9361	1.88	2.53	1.77	0.743083	8.41883	-0.61	0.21	0.05	-0.330193	-1.51727	-0.24498	0.0905172	0.0290698
5	240	1.97	2.21	1.63	0.891403	7.09653	2.15	2.38	1.97	0.903361	10.0805	0.18	0.17	0.34	0.0119586	2.98396	0.0913706	0.0769231	0.208589
5	240	2.07	2.27	1.69	0.911894	7.94114	2.3	2.37	1.88	0.970464	10.2479	0.23	0.1	0.19	0.0585699	2.30674	0.111111	0.0440529	0.112426
5	240	2	2.24	1.78	0.892857	7.9744	2.02	2.57	1.87	0.785992	9.70792	0.02	0.33	0.09	-0.106865	1.73352	0.01	0.147321	0.0505618
5	240	2.04	2.19	1.58	0.931507	7.05881	2.25	2.5	1.98	0.9	11.1375	0.21	0.31	0.4	-0.0315068	4.07869	0.102941	0.141553	0.253165
5	240	2.01	2.21	1.64	0.909502	7.28504	2.45	2.65	1.9	0.924528	12.3358	0.44	0.44	0.26	0.015026	5.05071	0.218905	0.199095	0.158537
1	250	2.03	2.26	1.72	0.89823	7.89102	1.79	1.96	1.55	0.913265	5.43802	-0.24	-0.3	-0.17	0.0150352	-2.453	-0.118227	-0.132743	-0.0988372
1	250	2.04	2.23	1.62	0.914798	7.3697	2.08	2.18	1.7	0.954128	7.70848	0.04	-0.05	0.08	0.0393302	0.338776	0.0196078	-0.0224215	0.0493827
1	250	2.01	2.1	1.48	0.957143	6.24708	2.06	2.24	1.72	0.919643	7.93677	0.05	0.14	0.24	-0.0375	1.68969	0.0248756	0.0666667	0.162162
1	250	2.26	2.18	1.53	1.0367	7.538	2.16	2.34	1.78	0.923077	8.99683	-0.1	0.16	0.25	-0.11362	1.45883	-0.0442478	0.0733945	0.163399
1	250	2.09	2.21	1.75	0.945701	8.08308	1.91	2.13	1.62	0.896714	6.59065	-0.18	-0.08	-0.13	-0.0489877	-1.49243	-0.0861244	-0.0361991	-0.0742857
1	250	2.19	2.4	1.78	0.9125	9.35568	2.08	2.22	1.79	0.936937	8.2655	-0.11	-0.18	0.01	0.0244369	-1.09018	-0.0502283	-0.075	0.00561798
1	250	1.9	2.15	1.68	0.883721	6.8628	1.95	2.24	1.7	0.870536	7.4256	0.05	0.09	0.02	-0.0131852	0.5628	0.0263158	0.0418605	0.0119048
1	250	1.95	2.35	1.79	0.829787	8.20268	2.05	2.17	1.64	0.9447	7.29554	0.1	-0.18	-0.15	0.114913	-0.907135	0.0512821	-0.0765957	-0.0837989
1	250	2.09	2.29	1.72	0.912664	8.23209	2	2.28	1.74	0.877193	7.9344	-0.09	-0.01	0.02	-0.0354708	-0.297692	-0.0430622	-0.00436681	0.0116279
1	250	1.97	2.25	1.77	0.875556	7.84553	1.99	2.31	1.68	0.861472	7.72279	0.02	0.06	-0.09	-0.0140837	-0.122733	0.0101523	0.0266667	-0.0508475
1	250	2.54	2.13	1.65	1.19249	8.92683	1.86	2.21	1.66	0.841629	6.8236	-0.68	0.08	0.01	-0.350859	-2.10323	-0.267717	0.0375587	0.00606061
1	250	2.06	2.2	1.65	0.936364	7.4778	2.4	2.16	1.61	1.11111	8.34624	0.34	-0.04	-0.04	0.174747	0.86844	0.165049	-0.0181818	-0.0242424
1	250	2.07	2.39	1.73	0.866109	8.55883	1.95	1.92	1.53	1.01562	5.72832	-0.12	-0.47	-0.2	0.149516	-2.83051	-0.057971	-0.196653	-0.115607
1	250	1.97	2.29	1.66	0.860262	7.48876	2.1	2.16	1.66	0.972222	7.52976	0.13	-0.13	0	0.11196	0.041002	0.0659898	-0.0567686	0
1	250	2.06	2.18	1.72	0.944954	7.72418	1.98	1.96	1.51	1.0102	5.86001	-0.08	-0.22	-0.21	0.06525	-1.86417	-0.038835	-0.100917	-0.122093
1	250	1.93	2.03	1.57	0.950739	6.1511	2.2	2.15	1.54	1.02326	7.2842	0.27	0.12	-0.03	0.0725169	1.1331	0.139896	0.0591133	-0.0191083
1	250	1.98	2.09	1.53	0.947368	6.33145	1.94	2.12	1.61	0.915094	6.62161	-0.04	0.03	0.08	-0.0322741	0.290162	-0.020202	0.0143541	0.0522876
1	250	2.11	2.22	1.6	0.95045	7.49472	2.03	2.26	1.69	0.89823	7.75338	-0.08	0.04	0.09	-0.0522204	0.258662	-0.0379147	0.018018	0.05625
1	250	2.01	2.21	1.66	0.909502	7.37389	2	2.14	1.68	0.934579	7.1904	-0.01	-0.07	0.02	0.0250772	-0.183486	-0.00497512	-0.0316742	0.0120482
1	250	1.95	2.21	1.71	0.882353	7.36924	2	2.15	1.7	0.930233	7.31	0.05	-0.06	-0.01	0.0478796	-0.059245	0.025641	-0.0271493	-0.00584795
3	250	2.01	2.34	1.72	0.858974	8.08985	2.24	2.65	2.14	0.845283	12.703	0.23	0.31	0.42	-0.0136913	4.61319	0.114428	0.132479	0.244186
3	250	2.16	2.27	1.73	0.951542	8.48254	1.9	2.59	1.91	0.733591	9.39911	-0.26	0.32	0.18	-0.217951	0.916574	-0.12037	0.140969	0.104046
3	250	1.95	2.43	1.8	0.802469	8.5293	2.01	2.62	2.02	0.767176	10.6377	0.06	0.19	0.22	-0.0352936	2.10842	0.0307692	0.0781893	0.122222
3	250	2.25	2.38	1.71	0.945378	9.15705	2.12	2.47	1.87	0.8583	9.79207	-0.13	0.09	0.16	-0.0870786	0.635018	-0.0577778	0.0378151	0.0935673
3	250	2.18	2.39	1.72	0.912134	8.96154	1.94	2.29	2.32	0.847162	10.3068	-0.24	-0.1	0.6	-0.0649723	1.34529	-0.110092	-0.041841	0.348837
3	250	2.07	2.3	1.72	0.9	8.18892	2.04	2.5	1.86	0.816	9.486	-0.03	0.2	0.14	-0.084	1.29708	-0.0144928	0.0869565	0.0813953
3	250	1.97	2.39	1.78	0.824268	8.38077	2.01	3.07	1.76	0.654723	10.8604	0.04	0.68	-0.02	-0.169545	2.47966	0.0203046	0.284519	-0.011236
3	250	2.11	2.21	1.69	0.954751	7.88064	2.01	2.84	1.69	0.707746	9.6472	-0.1	0.63	0	-0.247005	1.76656	-0.0473934	0.285068	0
3	250	2.31	2.29	1.72	1.00873	9.09863	2.04	2.44	1.95	0.836066	9.70632	-0.27	0.15	0.23	-0.172668	0.607692	-0.116883	0.0655022	0.133721
3	250	1.89	2.24	1.66	0.84375	7.02778	1.97	2.57	2	0.766537	10.1258	0.08	0.33	0.34	-0.077213	3.09802	0.042328	0.147321	0.204819
3	250	1.91	2.35	1.78	0.812766	7.98953	2.01	2.54	1.8	0.791339	9.18972	0.1	0.19	0.02	-0.0214274	1.20019	0.052356	0.0808511	0.011236
3	250	2.37	2.02	1.82	1.17327	8.71307	2.32	2.77	2	0.837545	12.8528	-0.05	0.75	0.18	-0.335722	4.13973	-0.021097	0.371287	0.0989011
3	250	2.09	2.29	1.78	0.912664	8.51926	2.33	3.07	1.85	0.758958	13.2332	0.24	0.78	0.07	-0.153706	4.71398	0.114833	0.340611	0.0393258
3	250	1.84	2.08	1.61	0.884615	6.16179	2.81	2.65	1.82	1.06038	13.5526	0.97	0.57	0.21	0.175762	7.39084	0.527174	0.274038	0.130435
3	250	2.08	2.26	1.63	0.920354	7.6623	1.94	2.12	1.85	0.915094	7.60868	-0.14	-0.14	0.22	-0.00525964	-0.053624	-0.0673077	-0.0619469	0.134969
3	250	2.19	2.22	1.62	0.986486	7.87612	2.45	2.58	2	0.949612	12.642	0.26	0.36	0.38	-0.0368741	4.76588	0.118721	0.162162	0.234568
3	250	2.13	2.27	1.71	0.938326	8.26802	2.13	2.66	2.06	0.800752	11.6715	0	0.39	0.35	-0.137574	3.40353	0	0.171806	0.204678
3	250	2.26	2.1	1.61	1.07619	7.64106	2.24	2.86	2.01	0.783217	12.8769	-0.02	0.76	0.4	-0.292974	5.2358	-0.00884956	0.361905	0.248447
3	250	2.11	2.3	1.75	0.917391	8.49275	N/A	N/A	N/A
3	250	2.2	2.28	1.7	0.964912	8.5272	N/A	N/A	N/A
5	250	2.16	2.38	1.74	0.907563	8.94499	2.03	2.59	1.81	0.783784	9.51644	-0.13	0.21	0.07	-0.123779	0.571445	-0.0601852	0.0882353	0.0402299
5	250	1.98	2.24	1.72	0.883929	7.62854	1.73	2.3	1.69	0.752174	6.72451	-0.25	0.06	-0.03	-0.131755	-0.904034	-0.126263	0.0267857	-0.0174419
5	250	1.93	2.28	1.68	0.846491	7.39267	1.93	2.43	1.87	0.794239	8.77011	0	0.15	0.19	-0.0522525	1.37744	0	0.0657895	0.113095
5	250	1.94	2.24	1.67	0.866071	7.25715	1.95	2.59	1.88	0.752896	9.49494	0.01	0.35	0.21	-0.113176	2.23779	0.00515464	0.15625	0.125749
5	250	2.35	2.27	1.74	1.03524	9.28203	2.04	2.45	1.81	0.832653	9.04638	-0.31	0.18	0.07	-0.202589	-0.23565	-0.131915	0.0792952	0.0402299
5	250	2.27	2.36	1.73	0.961864	9.26796	1.99	2.26	1.74	0.880531	7.82548	-0.28	-0.1	0.01	-0.0813334	-1.44248	-0.123348	-0.0423729	0.00578035
5	250	2.06	2.21	1.67	0.932127	7.60284	2.01	2.52	1.61	0.797619	8.15497	-0.05	0.31	-0.06	-0.134508	0.55213	-0.0242718	0.140271	-0.0359281
5	250	2.21	2.18	1.6	1.01376	7.70848	2	2.37	1.59	0.843882	7.5366	-0.21	0.19	-0.01	-0.16988	-0.17188	-0.0950226	0.087156	-0.00625
5	250	2.15	2.23	1.79	0.964126	8.58216	1.8	2.33	1.99	0.772532	8.34606	-0.35	0.1	0.2	-0.191593	-0.236095	-0.162791	0.044843	0.111732
5	250	2	2.22	1.62	0.900901	7.1928	2.09	2.77	1.95	0.754513	11.2891	0.09	0.55	0.33	-0.146388	4.09633	0.045	0.247748	0.203704
5	250	2.12	2.31	1.71	0.917749	8.37421	2.04	2.54	1.83	0.80315	9.48233	-0.08	0.23	0.12	-0.114599	1.10812	-0.0377358	0.0995671	0.0701754
5	250	1.97	2.3	1.7	0.856522	7.7027	2.42	2.67	2	0.906367	12.9228	0.45	0.37	0.3	0.0498453	5.2201	0.228426	0.16087	0.176471
5	250	2.13	2.26	1.79	0.942478	8.6167	2.3	2.45	2.04	0.938776	11.4954	0.17	0.19	0.25	-0.00370237	2.8787	0.0798122	0.0840708	0.139665
5	250	2.09	2.33	1.76	0.896996	8.57067	1.92	2.86	1.91	0.671329	10.4882	-0.17	0.53	0.15	-0.225667	1.91752	-0.0813397	0.227468	0.0852273
5	250	2.22	2.4	1.83	0.925	9.75024	2.1	2.61	1.81	0.804598	9.92061	-0.12	0.21	-0.02	-0.120402	0.17037	-0.0540541	0.0875	-0.010929
5	250	1.92	2.3	1.71	0.834783	7.55136	2	2.28	1.86	0.877193	8.4816	0.08	-0.02	0.15	0.0424104	0.93024	0.0416667	-0.00869565	0.0877193
5	250	2.41	2.34	1.79	1.02991	10.0945	2.19	2.63	2.11	0.8327	12.153	-0.22	0.29	0.32	-0.197215	2.05844	-0.0912863	0.123932	0.178771
5	250	1.99	2.29	1.8	0.868996	8.20278	2.17	2.59	2.02	0.837838	11.353	0.18	0.3	0.22	-0.0311578	3.15023	0.0904523	0.131004	0.122222
5	250	2	2.19	1.62	0.913242	7.0956	1.97	2.84	1.79	0.693662	10.0147	-0.03	0.65	0.17	-0.21958	2.91909	-0.015	0.296804	0.104938
5	250	2.09	2.32	1.76	0.900862	8.53389	1.83	2.92	1.8	0.626712	9.61848	-0.26	0.6	0.04	-0.27415	1.08459	-0.124402	0.258621	0.0227273
1	260	2.12	2.49	1.81	0.851406	9.55463	1.85	2.16	1.69	0.856481	6.75324	-0.27	-0.33	-0.12	0.00507586	-2.80139	-0.127358	-0.13253	-0.0662983
1	260	2.28	2.49	1.9	0.915663	10.7867	2.22	2.11	1.54	1.05213	7.21367	-0.06	-0.38	-0.36	0.13647	-3.57301	-0.0263158	-0.15261	-0.189474
1	260	2.09	2.21	1.57	0.945701	7.25167	2.14	2.32	1.74	0.922414	8.63875	0.05	0.11	0.17	-0.0232876	1.38708	0.0239234	0.0497738	0.10828
1	260	2.15	2.44	1.81	0.881148	9.49526	1.92	2.07	1.55	0.927536	6.16032	-0.23	-0.37	-0.26	0.0463887	-3.33494	-0.106977	-0.151639	-0.143646
1	260	2.2	2.31	1.69	0.952381	8.58858	2.07	2.25	1.71	0.92	7.96432	-0.13	-0.06	0.02	-0.032381	-0.624255	-0.0590909	-0.025974	0.0118343
1	260	2.09	2.15	1.64	0.972093	7.36934	2.11	2.2	1.66	0.959091	7.70572	0.02	0.05	0.02	-0.0130021	0.33638	0.00956938	0.0232558	0.0121951
1	260	1.93	2.45	1.83	0.787755	8.65316	1.93	1.97	1.47	0.979695	5.58909	0	-0.48	-0.36	0.19194	-3.06407	0	-0.195918	-0.196721
1	260	2.02	2.39	1.81	0.845188	8.73832	2.07	2.37	1.75	0.873418	8.58532	0.05	-0.02	-0.06	0.0282294	-0.152993	0.0247525	-0.0083682	-0.0331492
1	260	2.3	2.42	1.82	0.950413	10.1301	2.06	2.29	1.66	0.899563	7.83088	-0.24	-0.13	-0.16	-0.0508499	-2.29924	-0.104348	-0.053719	-0.0879121
1	260	2.3	2.29	1.8	1.00437	9.4806	2.06	2.21	1.72	0.932127	7.83047	-0.24	-0.08	-0.08	-0.0722401	-1.65013	-0.104348	-0.0349345	-0.0444444
1	260	2.38	2.36	1.82	1.00847	10.2226	1.88	2.22	1.63	0.846847	6.80297	-0.5	-0.14	-0.19	-0.161628	-3.41961	-0.210084	-0.059322	-0.104396
1	260	2.23	2.37	1.8	0.940928	9.51318	1.86	2.18	1.59	0.853211	6.44713	-0.37	-0.19	-0.21	-0.0877173	-3.06605	-0.165919	-0.0801688	-0.116667
1	260	2.31	2.39	1.74	0.966527	9.60637	1.8	2.02	1.49	0.891089	5.41764	-0.51	-0.37	-0.25	-0.0754381	-4.18873	-0.220779	-0.154812	-0.143678
1	260	2.15	2.35	1.89	0.914894	9.54922	2.13	2.22	1.73	0.959459	8.18048	-0.02	-0.13	-0.16	0.0445658	-1.36875	-0.00930233	-0.0553191	-0.0846561
1	260	2.11	2.11	1.6	1	7.12336	2.25	2.24	1.71	1.00446	8.6184	0.14	0.13	0.11	0.00446429	1.49504	0.0663507	0.0616114	0.06875
1	260	2.43	2.31	1.7	1.05195	9.54261	1.9	2.27	1.77	0.837004	7.63401	-0.53	-0.04	0.07	-0.214944	-1.9086	-0.218107	-0.017316	0.0411765
1	260	2.45	2.38	1.79	1.02941	10.4375	1.94	2.24	1.63	0.866071	7.08333	-0.51	-0.14	-0.16	-0.16334	-3.35416	-0.208163	-0.0588235	-0.0893855
1	260	2.27	2.42	1.7	0.938017	9.33878	1.84	2.12	1.73	0.867925	6.74838	-0.43	-0.3	0.03	-0.070092	-2.5904	-0.189427	-0.123967	0.0176471
1	260	2.31	2.31	1.75	1	9.33817	2.15	2.27	1.61	0.947137	7.8576	-0.16	-0.04	-0.14	-0.0528634	-1.48057	-0.0692641	-0.017316	-0.08
1	260	2.12	2.4	1.77	0.883333	9.00576	3.26	2.62	2.13	1.24427	18.1928	1.14	0.22	0.36	0.360941	9.187	0.537736	0.0916667	0.20339
3	260	2.18	1.92	1.73	1.13542	7.24109	2.21	2.46	1.95	0.898374	10.6014	0.03	0.54	0.22	-0.237043	3.36028	0.0137615	0.28125	0.127168
3	260	2.1	2.37	1.69	0.886076	8.41113	2.2	2.73	1.81	0.805861	10.8709	0.1	0.36	0.12	-0.0802151	2.45973	0.047619	0.151899	0.0710059
3	260	2.14	2.29	1.74	0.934498	8.52704	2.22	2.37	1.78	0.936709	9.36529	0.08	0.08	0.04	0.00221104	0.838248	0.0373832	0.0349345	0.0229885
3	260	2.1	2.33	1.67	0.901288	8.17131	2.2	2.45	2.19	0.897959	11.8041	0.1	0.12	0.52	-0.00332837	3.63279	0.047619	0.0515021	0.311377
3	260	2.07	2.37	1.74	0.873418	8.53627	2.61	2.86	2.4	0.912587	17.915	0.54	0.49	0.66	0.0391697	9.37877	0.26087	0.206751	0.37931
3	260	2.18	2.29	1.65	0.951965	8.23713	2.58	2.65	2.45	0.973585	16.7507	0.4	0.36	0.8	0.0216198	8.51352	0.183486	0.157205	0.484848
3	260	1.97	2.35	1.79	0.838298	8.28681	2.07	2.8	1.86	0.739286	10.7806	0.1	0.45	0.07	-0.0990122	2.49375	0.0507614	0.191489	0.0391061
3	260	2.12	2.24	1.68	0.946429	7.97798	2.07	2.97	1.94	0.69697	11.9269	-0.05	0.73	0.26	-0.249459	3.94894	-0.0235849	0.325893	0.154762
3	260	1.92	2.3	1.76	0.834783	7.77216	2.13	2.45	1.83	0.869388	9.54985	0.21	0.15	0.07	0.0346051	1.77769	0.109375	0.0652174	0.0397727
3	260	2	2.44	1.77	0.819672	8.6376	2.33	3.12	2.06	0.746795	14.9754	0.33	0.68	0.29	-0.0728773	6.33778	0.165	0.278689	0.163842
3	260	2.03	2.33	1.71	0.871245	8.08813	2.13	2.87	2.07	0.74216	12.6541	0.1	0.54	0.36	-0.129084	4.56599	0.0492611	0.23176	0.210526
3	260	2.08	2.28	1.77	0.912281	8.39405	2.29	2.62	1.98	0.874046	11.8796	0.21	0.34	0.21	-0.0382349	3.48556	0.100962	0.149123	0.118644
3	260	2.2	2.28	1.72	0.964912	8.62752	2.18	2.84	1.97	0.767606	12.1967	-0.02	0.56	0.25	-0.197307	3.56914	-0.00909091	0.245614	0.145349
3	260	2.12	2.35	1.71	0.902128	8.51922	2.19	2.61	2.02	0.83908	11.5461	0.07	0.26	0.31	-0.0630472	3.0269	0.0330189	0.110638	0.181287
3	260	2.28	2.29	1.82	0.995633	9.50258	2.35	2.81	1.96	0.836299	12.9429	0.07	0.52	0.14	-0.159334	3.44028	0.0307018	0.227074	0.0769231
3	260	2.38	2.33	1.73	1.02146	9.59354	2.28	2.36	1.93	0.966102	10.3849	-0.1	0.03	0.2	-0.0553575	0.791402	-0.0420168	0.0128755	0.115607
3	260	2.09	2.27	1.7	0.920705	8.06531	2.49	3.67	2.09	0.678474	19.099	0.4	1.4	0.39	-0.242231	11.0337	0.191388	0.61674	0.229412
3	260	1.97	2.26	1.79	0.871681	7.96944	2.22	2.27	2.18	0.977974	10.9859	0.25	0.01	0.39	0.106292	3.01645	0.126904	0.00442478	0.217877
3	260	2.39	2.19	1.57	1.09132	8.21754	2.4	2.93	2.16	0.819113	15.1891	0.01	0.74	0.59	-0.272212	6.97158	0.0041841	0.3379	0.375796
3	260	2.16	2.03	1.65	1.06404	7.23492	2.13	2.62	2.13	0.812977	11.8867	-0.03	0.59	0.48	-0.251062	4.65176	-0.0138889	0.29064	0.290909
5	260	2.12	2.27	1.8	0.933921	8.66232	2.18	2.53	1.97	0.86166	10.8653	0.06	0.26	0.17	-0.0722606	2.20302	0.0283019	0.114537	0.0944444
5	260	2.18	2.33	1.67	0.935622	8.4826	1.96	2.58	1.92	0.75969	9.70906	-0.22	0.25	0.25	-0.175932	1.22646	-0.100917	0.107296	0.149701
5	260	2.07	2.31	1.76	0.896104	8.41579	2.04	2.55	1.83	0.8	9.51966	-0.03	0.24	0.07	-0.0961039	1.10387	-0.0144928	0.103896	0.0397727
5	260	2.11	2.36	1.72	0.894068	8.56491	1.86	2.36	1.99	0.788136	8.7353	-0.25	0	0.27	-0.105932	0.170392	-0.118483	0	0.156977
5	260	2.12	2.38	1.84	0.890756	9.2839	2.05	2.49	2.25	0.823293	11.4851	-0.07	0.11	0.41	-0.0674631	2.20122	-0.0330189	0.0462185	0.222826
5	260	2.08	2.37	1.85	0.877637	9.11976	2.15	2.81	1.98	0.765125	11.9622	0.07	0.44	0.13	-0.112513	2.84241	0.0336538	0.185654	0.0702703
5	260	2.07	2.42	1.76	0.855372	8.81654	2.02	3.2	1.7	0.63125	10.9888	-0.05	0.78	-0.06	-0.224122	2.17226	-0.0241546	0.322314	-0.0340909
5	260	2.16	2.32	1.71	0.931034	8.56915	2.1	2.45	1.93	0.857143	9.92985	-0.06	0.13	0.22	-0.0738916	1.3607	-0.0277778	0.0560345	0.128655
5	260	2.05	2.19	1.63	0.936073	7.31788	2.12	2.44	2.16	0.868852	11.1732	0.07	0.25	0.53	-0.0672206	3.85536	0.0341463	0.114155	0.325153
5	260	2.17	2.3	1.73	0.943478	8.63443	2.08	2.91	2.1	0.714777	12.7109	-0.09	0.61	0.37	-0.228702	4.07645	-0.0414747	0.265217	0.213873
5	260	2.08	2.38	1.73	0.87395	8.56419	1.92	2.71	2.12	0.708487	11.0308	-0.16	0.33	0.39	-0.165462	2.46659	-0.0769231	0.138655	0.225434
5	260	2.09	2.4	1.82	0.870833	9.12912	2.08	2.69	1.91	0.773234	10.6868	-0.01	0.29	0.09	-0.0975991	1.55771	-0.00478469	0.120833	0.0494505
5	260	2.11	2.11	1.68	1	7.47953	2.07	2.36	2.03	0.877119	9.91696	-0.04	0.25	0.35	-0.122881	2.43743	-0.0189573	0.118483	0.208333
5	260	1.88	2.14	1.71	0.878505	6.87967	2.47	2.82	2.23	0.875887	15.5328	0.59	0.68	0.52	-0.00261815	8.65317	0.31383	0.317757	0.304094
5	260	2.31	2.34	1.8	0.987179	9.72972	2.08	2.76	1.98	0.753623	11.3668	-0.23	0.42	0.18	-0.233556	1.63706	-0.0995671	0.179487	0.1
5	260	2	2.14	1.69	0.934579	7.2332	2.43	2.63	2.19	0.923954	13.9961	0.43	0.49	0.5	-0.0106251	6.76287	0.215	0.228972	0.295858
5	260	2.07	2.36	1.81	0.877119	8.84221	1.98	2.74	2.12	0.722628	11.5014	-0.09	0.38	0.31	-0.154491	2.65921	-0.0434783	0.161017	0.171271
5	260	2.64	2.27	1.78	1.163	10.6672	2.36	2.92	1.92	0.808219	13.2311	-0.28	0.65	0.14	-0.354776	2.56392	-0.106061	0.286344	0.0786517
5	260	2.12	2.31	1.76	0.917749	8.61907	2.21	2.83	1.88	0.780919	11.7581	0.09	0.52	0.12	-0.13683	3.13901	0.0424528	0.225108	0.0681818
5	260	1.99	2.32	1.85	0.857759	8.54108	2.05	2.7	2.09	0.759259	11.5681	0.06	0.38	0.24	-0.0984994	3.02707	0.0301508	0.163793	0.12973
1	270	2.34	2.22	1.55	1.05405	8.05194	2.48	3.27	2.4	0.75841	19.463	0.14	1.05	0.85	-0.295644	11.4111	0.0598291	0.472973	0.548387
1	270	2.03	2.3	1.62	0.882609	7.56378	2.71	3.66	2.28	0.740437	22.6144	0.68	1.36	0.66	-0.142172	15.0506	0.334975	0.591304	0.407407
1	270	2.04	2.3	1.73	0.886957	8.11716	2.44	3.13	2.01	0.779553	15.3508	0.4	0.83	0.28	-0.107404	7.23361	0.196078	0.36087	0.16185
1	270	1.85	2.31	1.77	0.800866	7.5641	2.33	3.2	2.15	0.728125	16.0304	0.48	0.89	0.38	-0.0727408	8.4663	0.259459	0.385281	0.214689
1	270	2.19	2.26	1.72	0.969027	8.51297	2.48	3.2	2.55	0.775	20.2368	0.29	0.94	0.83	-0.194027	11.7238	0.13242	0.415929	0.482558
1	270	1.97	2.27	1.76	0.867841	7.87054	2.71	3.08	2.66	0.87987	22.2025	0.74	0.81	0.9	0.0120287	14.3319	0.375635	0.356828	0.511364
1	270	2.06	2.33	1.73	0.88412	8.30365	2.74	3.05	2.18	0.898361	18.2183	0.68	0.72	0.45	0.0142405	9.91461	0.330097	0.309013	0.260116
1	270	2.54	2.36	1.84	1.07627	11.0297	2.31	3.38	2.55	0.683432	19.9099	-0.23	1.02	0.71	-0.392839	8.88019	-0.0905512	0.432203	0.38587
1	270	2.06	2.31	1.66	0.891775	7.89928	2.39	3.18	2.21	0.751572	16.7964	0.33	0.87	0.55	-0.140203	8.89717	0.160194	0.376623	0.331325
1	270	2.27	2.2	1.68	1.03182	8.38992	3.04	3.41	2.44	0.891496	25.294	0.77	1.21	0.76	-0.140323	16.9041	0.339207	0.55	0.452381
1	270	1.97	2.32	1.72	0.849138	7.86109	2.44	3.94	2.26	0.619289	21.7267	0.47	1.62	0.54	-0.229849	13.8656	0.238579	0.698276	0.313953
1	270	2.25	2.3	1.75	0.978261	9.05625	2.59	3.27	2.23	0.792049	18.8865	0.34	0.97	0.48	-0.186212	9.83029	0.151111	0.421739	0.274286
1	270	2.09	2.33	1.75	0.896996	8.52197	2.2	3.71	2.95	0.592992	24.0779	0.11	1.38	1.2	-0.304004	15.5559	0.0526316	0.592275	0.685714
1	270	2.04	2.35	1.78	0.868085	8.53332	2.45	3.41	2.43	0.718475	20.3014	0.41	1.06	0.65	-0.14961	11.7681	0.20098	0.451064	0.365169
1	270	2.06	2.42	1.81	0.85124	9.02321	2.45	2.79	2.09	0.878136	14.2862	0.39	0.37	0.28	0.0268965	5.26298	0.18932	0.152893	0.154696
1	270	2.03	2.26	1.76	0.89823	8.07453	2.36	3.15	1.97	0.749206	14.645	0.33	0.89	0.21	-0.149024	6.57045	0.162562	0.393805	0.119318
1	270	2.31	2.21	1.75	1.04525	8.93393	2.23	3.43	2.51	0.650146	19.1987	-0.08	1.22	0.76	-0.395103	10.2648	-0.034632	0.552036	0.434286
1	270	1.96	2.34	1.68	0.837607	7.70515	2.55	2.75	2.14	0.927273	15.0067	0.59	0.41	0.46	0.0896659	7.3016	0.30102	0.175214	0.27381
1	270	2.02	2.35	1.73	0.859574	8.21231	2.43	3.38	2	0.718935	16.4268	0.41	1.03	0.27	-0.14064	8.21449	0.20297	0.438298	0.156069
1	270	2.08	2.26	1.65	0.920354	7.75632	2.25	2.57	2.06	0.875486	11.9119	0.17	0.31	0.41	-0.0448676	4.15563	0.0817308	0.137168	0.248485
3	270	2.05	2.28	1.79	0.899123	8.36646	2.05	2.54	1.96	0.807087	10.2057	0	0.26	0.17	-0.0920362	1.83926	0	0.114035	0.0949721
3	270	1.72	2.32	1.83	0.741379	7.30243	2.04	2.8	1.92	0.728571	10.967	0.32	0.48	0.09	-0.0128079	3.66461	0.186047	0.206897	0.0491803
3	270	2.05	2.32	1.66	0.883621	7.89496	2.2	3.16	1.98	0.696203	13.765	0.15	0.84	0.32	-0.187418	5.87	0.0731707	0.362069	0.192771
3	270	2.38	2.25	1.67	1.05778	8.94285	1.97	2.62	2.01	0.751908	10.3744	-0.41	0.37	0.34	-0.305869	1.43156	-0.172269	0.164444	0.203593
3	270	2.07	2.45	1.76	0.844898	8.92584	2.88	2.27	2.18	1.26872	14.252	0.81	-0.18	0.42	0.423825	5.32613	0.391304	-0.0734694	0.238636
3	270	2.08	2.23	1.68	0.932735	7.79251	1.92	2.57	1.74	0.747082	8.58586	-0.16	0.34	0.06	-0.185654	0.793344	-0.0769231	0.152466	0.0357143
3	270	1.99	2.14	1.81	0.929907	7.70807	1.98	2.25	1.85	0.88	8.24175	-0.01	0.11	0.04	-0.0499065	0.533684	-0.00502513	0.0514019	0.0220994
3	270	1.96	2.07	1.48	0.94686	6.00466	1.84	3.08	1.82	0.597403	10.3143	-0.12	1.01	0.34	-0.349457	4.30965	-0.0612245	0.487923	0.22973
3	270	2.09	2.33	1.74	0.896996	8.47328	2.16	3.15	1.82	0.685714	12.3833	0.07	0.82	0.08	-0.211281	3.91	0.0334928	0.351931	0.045977
3	270	2.01	2.32	1.72	0.866379	8.0207	2.25	3.39	1.87	0.663717	14.2634	0.24	1.07	0.15	-0.202662	6.24272	0.119403	0.461207	0.0872093
3	270	1.98	2.09	1.67	0.947368	6.91079	1.74	3.25	2.13	0.535385	12.0451	-0.24	1.16	0.46	-0.411984	5.13436	-0.121212	0.555024	0.275449
3	270	2.12	2.18	1.66	0.972477	7.67186	2.26	3.09	2.34	0.731392	16.3412	0.14	0.91	0.68	-0.241085	8.6693	0.0660377	0.417431	0.409639
3	270	2.07	2.26	1.69	0.915929	7.90616	2.44	2.68	2.06	0.910448	13.4708	0.37	0.42	0.37	-0.00548144	5.56459	0.178744	0.185841	0.218935
3	270	2.06	2.23	1.67	0.923767	7.67165	3.23	2.09	1.98	1.54545	13.3664	1.17	-0.14	0.31	0.621688	5.69474	0.567961	-0.0627803	0.185629
3	270	2.09	2.11	1.67	0.990521	7.36453	2.61	4.04	2.22	0.64604	23.4086	0.52	1.93	0.55	-0.344482	16.044	0.248804	0.914692	0.329341
3	270	2.03	2.26	1.69	0.89823	7.75338	2.18	2.46	2.01	0.886179	10.7792	0.15	0.2	0.32	-0.0120512	3.02585	0.0738916	0.0884956	0.189349
3	270	2.14	2.33	1.77	0.918455	8.82557	2.28	2.8	2.27	0.814286	14.4917	0.14	0.47	0.5	-0.104169	5.66611	0.0654206	0.201717	0.282486
3	270	2.24	2.38	1.75	0.941176	9.3296	2.24	2.96	1.87	0.756757	12.3988	0	0.58	0.12	-0.18442	3.06925	0	0.243697	0.0685714
3	270	2.13	2.3	1.8	0.926087	8.8182	2.22	3.37	2.08	0.658754	15.5613	0.09	1.07	0.28	-0.267333	6.74311	0.0422535	0.465217	0.155556
3	270	2.08	2.2	1.68	0.945455	7.68768	2.41	2.87	1.97	0.839721	13.6259	0.33	0.67	0.29	-0.105733	5.93822	0.158654	0.304545	0.172619
5	270	2.04	2.26	1.74	0.902655	8.0221	2.07	2.68	1.83	0.772388	10.1521	0.03	0.42	0.09	-0.130267	2.13001	0.0147059	0.185841	0.0517241
5	270	1.91	2.35	1.78	0.812766	7.98953	2.2	3.12	2.2	0.705128	15.1008	0.29	0.77	0.42	-0.107638	7.11127	0.151832	0.32766	0.235955
5	270	2.01	2.36	1.76	0.851695	8.34874	1.98	2.79	2.35	0.709677	12.9819	-0.03	0.43	0.59	-0.142017	4.63313	-0.0149254	0.182203	0.335227
5	270	2.22	2.32	1.8	0.956897	9.27072	2.24	2.66	2.16	0.842105	12.8701	0.02	0.34	0.36	-0.114791	3.59942	0.00900901	0.146552	0.2
5	270	2.17	2.21	1.71	0.9819	8.20065	1.69	4.07	1.94	0.415233	13.3439	-0.48	1.86	0.23	-0.566667	5.14325	-0.221198	0.841629	0.134503
5	270	1.96	1.98	1.43	0.989899	5.54954	2.14	2.65	2.06	0.807547	11.6823	0.18	0.67	0.63	-0.182352	6.13272	0.0918367	0.338384	0.440559
5	270	2.02	2.27	1.71	0.889868	7.84103	1.81	2.86	1.79	0.632867	9.26611	-0.21	0.59	0.08	-0.257001	1.42508	-0.10396	0.259912	0.0467836
5	270	2.09	2.3	1.68	0.908696	8.07576	1.92	2.99	1.8	0.64214	10.3334	-0.17	0.69	0.12	-0.266555	2.25768	-0.0813397	0.3	0.0714286
5	270	2.02	2.35	1.82	0.859574	8.63954	2.01	2.43	1.99	0.82716	9.71976	-0.01	0.08	0.17	-0.032414	1.08022	-0.0049505	0.0340426	0.0934066
5	270	2.07	2.36	1.74	0.877119	8.50025	2.16	2.66	1.82	0.81203	10.457	0.09	0.3	0.08	-0.0650886	1.95674	0.0434783	0.127119	0.045977
5	270	2.09	2.29	1.76	0.912664	8.42354	1.93	2.33	1.92	0.828326	8.63405	-0.16	0.04	0.16	-0.0843376	0.210512	-0.076555	0.0174672	0.0909091
5	270	2.22	2.35	1.66	0.944681	8.66022	2.39	2.89	2.04	0.82699	14.0905	0.17	0.54	0.38	-0.117691	5.43026	0.0765766	0.229787	0.228916
5	270	2.33	2.27	1.82	1.02643	9.62616	2.04	2.83	1.97	0.720848	11.3732	-0.29	0.56	0.15	-0.305584	1.74704	-0.124464	0.246696	0.0824176
5	270	2.05	2.34	1.75	0.876068	8.39475	2.03	3.15	2.42	0.644444	15.4747	-0.02	0.81	0.67	-0.231624	7.07994	-0.0097561	0.346154	0.382857
5	270	2.23	2.39	1.69	0.933054	9.00719	2.04	2.56	1.8	0.796875	9.40032	-0.19	0.17	0.11	-0.136179	0.393127	-0.0852018	0.0711297	0.0650888
5	270	2.17	2.31	1.83	0.939394	9.17324	1.88	2.45	1.75	0.767347	8.0605	-0.29	0.14	-0.08	-0.172047	-1.11274	-0.133641	0.0606061	-0.0437158
5	270	2.1	2.23	1.69	0.941704	7.91427	2.09	2.69	2.14	0.776952	12.0313	-0.01	0.46	0.45	-0.164752	4.11702	-0.0047619	0.206278	0.266272
5	270	1.97	2.24	1.57	0.879464	6.9281	1.93	2.66	2.16	0.725564	11.089	-0.04	0.42	0.59	-0.1539	4.16091	-0.0203046	0.1875	0.375796
5	270	2.13	2.24	1.66	0.950893	7.92019	2.07	2.84	2.11	0.728873	12.4043	-0.06	0.6	0.45	-0.22202	4.48408	-0.028169	0.267857	0.271084
5	270	1.98	2.35	1.76	0.842553	8.18928	1.81	2.71	1.7	0.667897	8.33867	-0.17	0.36	-0.06	-0.174657	0.14939	-0.0858586	0.153191	-0.0340909
1	280	2.12	2.32	1.75	0.913793	8.6072	2.33	3.17	1.96	0.735016	14.4768	0.21	0.85	0.21	-0.178777	5.86956	0.0990566	0.366379	0.12
1	280	2.27	2.33	1.71	0.974249	9.04436	2.3	3.03	1.86	0.759076	12.9623	0.03	0.7	0.15	-0.215173	3.91798	0.0132159	0.300429	0.0877193
1	280	2.22	1.87	1.48	1.18717	6.14407	2.32	3.25	2.26	0.713846	17.0404	0.1	1.38	0.78	-0.47332	10.8963	0.045045	0.737968	0.527027
1	280	2.04	2.29	1.74	0.89083	8.12858	2.74	3.69	2.15	0.742547	21.7378	0.7	1.4	0.41	-0.148282	13.6092	0.343137	0.611354	0.235632
1	280	2.11	2.32	1.57	0.909483	7.68546	2.27	3.23	2.53	0.702786	18.5502	0.16	0.91	0.96	-0.206696	10.8647	0.0758294	0.392241	0.611465
1	280	2.18	2.37	1.68	0.919831	8.67989	2.43	2.89	2.17	0.84083	15.2393	0.25	0.52	0.49	-0.0790008	6.55937	0.114679	0.219409	0.291667
1	280	1.96	2.33	1.72	0.841202	7.8549	2.61	3.52	2.45	0.741477	22.5086	0.65	1.19	0.73	-0.0997244	14.6537	0.331633	0.51073	0.424419
1	280	2.05	2.31	1.7	0.887446	8.05035	2.46	2.78	2.14	0.884892	14.635	0.41	0.47	0.44	-0.0025538	6.58468	0.2	0.203463	0.258824
1	280	2.06	2.28	1.67	0.903509	7.84366	2.44	3.46	1.93	0.705202	16.2938	0.38	1.18	0.26	-0.198306	8.45018	0.184466	0.517544	0.155689
1	280	1.86	2.23	1.69	0.834081	7.00978	2.33	3.22	2.46	0.723602	18.4564	0.47	0.99	0.77	-0.110478	11.4466	0.252688	0.443946	0.455621
1	280	2	2.22	1.64	0.900901	7.2816	2.01	3.29	2.09	0.610942	13.821	0.01	1.07	0.45	-0.289959	6.53936	0.005	0.481982	0.27439
1	280	2.05	2.19	1.63	0.936073	7.31788	2.23	3.58	2.13	0.622905	17.0046	0.18	1.39	0.5	-0.313168	9.68676	0.0878049	0.634703	0.306748
1	280	1.95	2.16	1.66	0.902778	6.99192	2.45	3.47	2.02	0.706052	17.173	0.5	1.31	0.36	-0.196726	10.1811	0.25641	0.606481	0.216867
1	280	1.93	2.21	1.6	0.873303	6.82448	2.19	3.93	2.1	0.557252	18.0741	0.26	1.72	0.5	-0.316051	11.2496	0.134715	0.778281	0.3125
1	280	2.14	2.35	1.73	0.910638	8.70017	2.37	3.12	2.35	0.759615	17.3768	0.23	0.77	0.62	-0.151023	8.67667	0.107477	0.32766	0.358382
1	280	1.96	2.35	1.72	0.834043	7.92232	2.43	3.26	2.39	0.745399	18.9331	0.47	0.91	0.67	-0.0886438	11.0108	0.239796	0.387234	0.389535
1	280	2.1	2.27	1.81	0.92511	8.62827	2.19	3.2	2.26	0.684375	15.8381	0.09	0.93	0.45	-0.240735	7.20981	0.0428571	0.409692	0.248619
1	280	2.01	2.21	1.66	0.909502	7.37389	2.64	3.14	2.62	0.840764	21.7188	0.63	0.93	0.96	-0.0687379	14.3449	0.313433	0.420814	0.578313
1	280	2.05	2.29	1.69	0.895197	7.9337	2.1	3.68	2.76	0.570652	21.3293	0.05	1.39	1.07	-0.324544	13.3956	0.0243902	0.606987	0.633136
1	280	2.14	2.36	1.73	0.90678	8.73719	2.32	3.2	2.17	0.725	16.1101	0.18	0.84	0.44	-0.18178	7.37289	0.0841121	0.355932	0.254335
3	280	2.06	2.24	1.65	0.919643	7.61376	2.14	2.94	1.99	0.727891	12.5203	0.08	0.7	0.34	-0.191752	4.90652	0.038835	0.3125	0.206061
3	280	2.15	2.2	1.66	0.977273	7.8518	2.31	3.37	2.07	0.68546	16.1143	0.16	1.17	0.41	-0.291813	8.26253	0.0744186	0.531818	0.246988
3	280	2.14	2.37	1.69	0.902954	8.57134	2.07	2.91	1.77	0.71134	10.6619	-0.07	0.54	0.08	-0.191613	2.09061	-0.0327103	0.227848	0.0473373
3	280	2.09	2.19	1.7	0.954338	7.78107	1.96	2.93	2.07	0.668942	11.8876	-0.13	0.74	0.37	-0.285396	4.10653	-0.062201	0.3379	0.217647
3	280	2.05	2.28	1.71	0.899123	7.99254	2.02	2.84	2	0.711268	11.4736	-0.03	0.56	0.29	-0.187855	3.48106	-0.0146341	0.245614	0.169591
3	280	2.29	2.33	1.71	0.982833	9.12405	2.22	3.04	2.18	0.730263	14.7124	-0.07	0.71	0.47	-0.252569	5.58834	-0.0305677	0.304721	0.274854
3	280	2.04	2.4	1.81	0.85	8.86176	1.94	2.3	1.53	0.843478	6.82686	-0.1	-0.1	-0.28	-0.00652174	-2.0349	-0.0490196	-0.0416667	-0.154696
3	280	2.22	2.29	1.73	0.969432	8.79497	2	2.76	2.3	0.724638	12.696	-0.22	0.47	0.57	-0.244795	3.90103	-0.0990991	0.20524	0.32948
3	280	2.18	2.41	1.87	0.904564	9.82461	2	2.72	1.92	0.735294	10.4448	-0.18	0.31	0.05	-0.16927	0.620194	-0.0825688	0.128631	0.026738
3	280	1.94	2.21	1.74	0.877828	7.46008	1.93	3.05	1.84	0.632787	10.8312	-0.01	0.84	0.1	-0.245041	3.37108	-0.00515464	0.38009	0.0574713
3	280	2.03	2.29	1.74	0.886463	8.08874	2.21	2.76	2.09	0.800725	12.7482	0.18	0.47	0.35	-0.0857382	4.65943	0.08867	0.20524	0.201149
3	280	1.97	2.18	1.6	0.90367	6.87136	2.1	3.18	1.88	0.660377	12.5546	0.13	1	0.28	-0.243292	5.68328	0.0659898	0.458716	0.175
3	280	2.11	2.18	1.58	0.96789	7.26768	2.04	3.31	2.07	0.616314	13.9775	-0.07	1.13	0.49	-0.351576	6.70978	-0.0331754	0.518349	0.310127
3	280	1.91	2.16	1.63	0.884259	6.72473	2.16	2.72	2.05	0.794118	12.0442	0.25	0.56	0.42	-0.0901416	5.31943	0.13089	0.259259	0.257669
3	280	1.96	2.11	1.3	0.92891	5.37628	1.93	3.29	2.08	0.586626	13.2074	-0.03	1.18	0.78	-0.342284	7.8311	-0.0153061	0.559242	0.6
3	280	2.17	2.31	1.74	0.939394	8.7221	2.35	3.19	2.34	0.736677	17.5418	0.18	0.88	0.6	-0.202717	8.81971	0.0829493	0.380952	0.344828
3	280	2.27	2.21	1.72	1.02715	8.62872	2.37	2.62	1.87	0.90458	11.6116	0.1	0.41	0.15	-0.122569	2.98285	0.0440529	0.18552	0.0872093
3	280	2.14	2.27	1.75	0.942731	8.50115	2.14	2.51	1.79	0.85259	9.61481	0	0.24	0.04	-0.0901416	1.11366	0	0.105727	0.0228571
3	280	2.05	2.3	1.8	0.891304	8.487	1.93	3.38	1.8	0.571006	11.7421	-0.12	1.08	0	-0.320298	3.25512	-0.0585366	0.469565	0
3	280	2.01	2.3	1.73	0.873913	7.99779	2.44	3.02	2.4	0.807947	17.6851	0.43	0.72	0.67	-0.065966	9.68733	0.21393	0.313043	0.387283
5	280	2.04	2.18	1.65	0.93578	7.33788	1.91	2.8	1.64	0.682143	8.77072	-0.13	0.62	-0.01	-0.253637	1.43284	-0.0637255	0.284404	-0.00606061
5	280	2.35	2.34	1.72	1.00427	9.45828	2.19	2.97	1.93	0.737374	12.5533	-0.16	0.63	0.21	-0.2669	3.09502	-0.0680851	0.269231	0.122093
5	280	2.3	2.42	1.77	0.950413	9.85182	2.05	2.77	1.75	0.740072	9.93737	-0.25	0.35	-0.02	-0.210341	0.085555	-0.108696	0.144628	-0.0112994
5	280	2.19	2.23	1.58	0.982063	7.71625	2.16	2.89	2.09	0.747405	13.0466	-0.03	0.66	0.51	-0.234658	5.33037	-0.0136986	0.295964	0.322785
5	280	2.02	2.38	1.72	0.848739	8.26907	2.01	2.71	1.96	0.741697	10.6763	-0.01	0.33	0.24	-0.107042	2.40724	-0.0049505	0.138655	0.139535
5	280	1.9	2.33	1.74	0.815451	7.70298	2.26	2.72	1.85	0.830882	11.3723	0.36	0.39	0.11	0.0154317	3.66934	0.189474	0.167382	0.0632184
5	280	2.03	2.16	1.7	0.939815	7.45416	1.84	2.76	2.28	0.666667	11.5788	-0.19	0.6	0.58	-0.273148	4.12459	-0.0935961	0.277778	0.341176
5	280	1.95	2.26	1.71	0.862832	7.53597	2.09	3.05	1.71	0.685246	10.9004	0.14	0.79	0	-0.177586	3.36443	0.0717949	0.349558	0
5	280	1.9	2.18	1.72	0.87156	7.12424	1.8	2.77	1.8	0.649819	8.9748	-0.1	0.59	0.08	-0.22174	1.85056	-0.0526316	0.270642	0.0465116
5	280	2.21	2.15	1.68	1.02791	7.98252	1.93	2.62	1.78	0.736641	9.00075	-0.28	0.47	0.1	-0.291266	1.01823	-0.126697	0.218605	0.0595238
5	280	1.96	2.25	1.63	0.871111	7.1883	1.98	2.71	1.74	0.730627	9.33649	0.02	0.46	0.11	-0.140484	2.14819	0.0102041	0.204444	0.0674847
5	280	2.12	2.38	1.8	0.890756	9.08208	2.09	2.96	1.8	0.706081	11.1355	-0.03	0.58	0	-0.184675	2.05344	-0.0141509	0.243697	0
5	280	2.03	2.25	1.7	0.902222	7.76475	2.11	2.59	1.72	0.814672	9.39963	0.08	0.34	0.02	-0.0875504	1.63488	0.0394089	0.151111	0.0117647
5	280	1.98	2.35	1.72	0.842553	8.00316	1.88	2.38	1.63	0.789916	7.29327	-0.1	0.03	-0.09	-0.0526372	-0.709888	-0.0505051	0.012766	-0.0523256
5	280	1.98	2.25	1.71	0.88	7.61805	2.15	2.68	2.04	0.802239	11.7545	0.17	0.43	0.33	-0.0777612	4.13643	0.0858586	0.191111	0.192982
5	280	2.07	2.29	1.89	0.90393	8.95917	2.39	2.61	2.11	0.915709	13.162	0.32	0.32	0.22	0.0117787	4.2028	0.154589	0.139738	0.116402
5	280	2.13	2.29	1.75	0.930131	8.53598	1.85	3.01	2.18	0.614618	12.1393	-0.28	0.72	0.43	-0.315513	3.60336	-0.131455	0.31441	0.245714
5	280	1.97	2.18	1.72	0.90367	7.38671	2.38	2.79	1.73	0.853047	11.4875	0.41	0.61	0.01	-0.0506231	4.10083	0.208122	0.279817	0.00581395
5	280	2.09	2.3	1.68	0.908696	8.07576	2.31	2.72	2.02	0.849265	12.6921	0.22	0.42	0.34	-0.0594309	4.6163	0.105263	0.182609	0.202381
5	280	2	2.3	1.63	0.869565	7.498	1.89	2.39	1.96	0.790795	8.85352	-0.11	0.09	0.33	-0.0787702	1.35552	-0.055	0.0391304	0.202454
1	290	2.26	2.26	1.69	1	8.63184	2.93	3	2.19	0.976667	19.2501	0.67	0.74	0.5	-0.0233333	10.6183	0.29646	0.327434	0.295858
1	290	1.98	2.21	1.74	0.895928	7.61389	2.4	3.14	1.93	0.764331	14.5445	0.42	0.93	0.19	-0.131596	6.93059	0.212121	0.420814	0.109195
1	290	2.07	2.2	1.78	0.940909	8.10612	2.34	3.62	2.48	0.646409	21.0076	0.27	1.42	0.7	-0.2945	12.9015	0.130435	0.645455	0.393258
1	290	2.28	2.16	1.56	1.05556	7.68269	2.82	3.8	2.61	0.742105	27.9688	0.54	1.64	1.05	-0.31345	20.2861	0.236842	0.759259	0.673077
1	290	2.08	2.29	1.67	0.908297	7.95454	2.25	2.99	2.11	0.752508	14.195	0.17	0.7	0.44	-0.155789	6.24048	0.0817308	0.305677	0.263473
1	290	2.06	2.32	1.71	0.887931	8.17243	2.85	3.58	2.28	0.796089	23.2628	0.79	1.26	0.57	-0.0918416	15.0904	0.383495	0.543103	0.333333
1	290	2.12	2.21	1.78	0.959276	8.33966	2.13	2.66	1.97	0.800752	11.1616	0.01	0.45	0.19	-0.158524	2.82197	0.00471698	0.20362	0.106742
1	290	2.57	2.26	1.72	1.13717	9.9901	2.69	3.16	2.61	0.851266	22.186	0.12	0.9	0.89	-0.285902	12.1959	0.0466926	0.39823	0.517442
1	290	2.48	2.23	1.63	1.11211	9.01455	2.39	3.04	2.21	0.786184	16.057	-0.09	0.81	0.58	-0.325923	7.04242	-0.0362903	0.363229	0.355828
1	290	2.1	2.09	1.6	1.00478	7.0224	2.33	3.09	2.17	0.754045	15.6233	0.23	1	0.57	-0.250739	8.60095	0.109524	0.478469	0.35625
1	290	2.19	2.27	1.68	0.964758	8.35178	2.44	3.45	2.17	0.707246	18.2671	0.25	1.18	0.49	-0.257511	9.91528	0.114155	0.519824	0.291667
1	290	2.54	2.3	1.72	1.10435	10.0482	2.45	3.19	2.33	0.768025	18.2101	-0.09	0.89	0.61	-0.336323	8.16188	-0.0354331	0.386957	0.354651
1	290	1.95	2.21	1.65	0.882353	7.11067	2.3	3.24	2.12	0.709877	15.7982	0.35	1.03	0.47	-0.172476	8.68756	0.179487	0.466063	0.284848
1	290	2.12	2.29	1.72	0.925764	8.35026	2.92	3.06	2.33	0.954248	20.819	0.8	0.77	0.61	0.0284842	12.4688	0.377358	0.336245	0.354651
1	290	2.02	2.25	1.63	0.897778	7.40835	3	3.22	2.31	0.931677	22.3146	0.98	0.97	0.68	0.0338992	14.9063	0.485149	0.431111	0.417178
1	290	2.31	2.5	1.83	0.924	10.5683	2.35	2.75	1.8	0.854545	11.6325	0.04	0.25	-0.03	-0.0694545	1.06425	0.017316	0.1	-0.0163934
1	290	1.99	2.26	1.63	0.880531	7.33076	2.58	3.42	2.21	0.754386	19.5002	0.59	1.16	0.58	-0.126145	12.1694	0.296482	0.513274	0.355828
1	290	2.11	2.27	1.73	0.929515	8.28618	2.68	3.2	2.03	0.8375	17.4093	0.57	0.93	0.3	-0.0920154	9.1231	0.270142	0.409692	0.17341
1	290	2.2	2.27	1.81	0.969163	9.03914	2.34	3.19	2.25	0.733542	16.7953	0.14	0.92	0.44	-0.235621	7.75621	0.0636364	0.405286	0.243094
1	290	2.08	2.28	1.72	0.912281	8.15693	2.4	2.64	2.59	0.909091	16.4102	0.32	0.36	0.87	-0.00318979	8.25331	0.153846	0.157895	0.505814
3	290	2.09	2.22	1.71	0.941441	7.93406	2.15	2.86	1.84	0.751748	11.3142	0.06	0.64	0.13	-0.189693	3.3801	0.0287081	0.288288	0.0760234
3	290	2.06	2.39	1.8	0.861925	8.86212	2.41	2.63	1.75	0.91635	11.092	0.35	0.24	-0.05	0.0544251	2.2299	0.169903	0.100418	-0.0277778
3	290	2.02	2.24	1.74	0.901786	7.87315	2.03	2.67	1.9	0.7603	10.2982	0.01	0.43	0.16	-0.141486	2.42504	0.0049505	0.191964	0.091954
3	290	1.93	2.25	1.73	0.857778	7.51253	2.25	3.05	2.15	0.737705	14.7544	0.32	0.8	0.42	-0.120073	7.24185	0.165803	0.355556	0.242775
3	290	2.31	2.38	1.78	0.970588	9.78608	2.43	2.86	2.13	0.84965	14.8031	0.12	0.48	0.35	-0.120938	5.01699	0.0519481	0.201681	0.196629
3	290	1.93	2.26	1.74	0.853982	7.58953	2.15	2.79	2.51	0.770609	15.0562	0.22	0.53	0.77	-0.083373	7.4667	0.11399	0.234513	0.442529
3	290	2.18	2.37	1.79	0.919831	9.24821	2.1	2.89	2.09	0.726644	12.6842	-0.08	0.52	0.3	-0.193188	3.436	-0.0366972	0.219409	0.167598
3	290	2.11	2.29	1.75	0.921397	8.45583	2.02	2.6	2	0.776923	10.504	-0.09	0.31	0.25	-0.144474	2.04818	-0.042654	0.135371	0.142857
3	290	1.97	2.36	1.76	0.834746	8.18259	2.38	3.26	1.91	0.730061	14.8193	0.41	0.9	0.15	-0.104684	6.63672	0.208122	0.381356	0.0852273
3	290	1.99	2.33	1.69	0.854077	7.83602	1.85	3.27	1.74	0.565749	10.5261	-0.14	0.94	0.05	-0.288328	2.69011	-0.0703518	0.403433	0.0295858
3	290	2.1	2.32	1.66	0.905172	8.08752	2.46	3.12	2.13	0.788462	16.3482	0.36	0.8	0.47	-0.116711	8.26066	0.171429	0.344828	0.283133
3	290	1.96	2.31	1.7	0.848485	7.69692	2.24	2.83	2.18	0.791519	13.8195	0.28	0.52	0.48	-0.0569654	6.12254	0.142857	0.225108	0.282353
3	290	1.98	2.24	1.79	0.883929	7.93901	2.38	2.91	2.5	0.817869	17.3145	0.4	0.67	0.71	-0.0660592	9.37549	0.20202	0.299107	0.396648
3	290	2.21	2.23	1.68	0.991031	8.27954	2.35	2.88	1.94	0.815972	13.1299	0.14	0.65	0.26	-0.175059	4.85038	0.0633484	0.29148	0.154762
3	290	2.02	2.27	1.65	0.889868	7.56591	3.14	2.38	1.92	1.31933	14.3485	1.12	0.11	0.27	0.42946	6.78263	0.554455	0.0484581	0.163636
3	290	2.31	2.32	1.53	0.99569	8.19958	2.29	3.14	2.16	0.729299	15.5317	-0.02	0.82	0.63	-0.26639	7.33212	-0.00865801	0.353448	0.411765
3	290	2.27	2.3	1.74	0.986957	9.08454	2.15	2.58	1.8	0.833333	9.9846	-0.12	0.28	0.06	-0.153623	0.90006	-0.0528634	0.121739	0.0344828
3	290	2.06	2.29	1.78	0.899563	8.39697	2.15	2.52	2.01	0.853175	10.8902	0.09	0.23	0.23	-0.0463887	2.49321	0.0436893	0.100437	0.129213
3	290	2.14	2.15	1.48	0.995349	6.80948	2.15	3.25	2.22	0.661538	15.5123	0.01	1.1	0.74	-0.33381	8.70277	0.0046729	0.511628	0.5
3	290	2.14	2.24	1.61	0.955357	7.7177	2.56	2.91	2.34	0.879725	17.4321	0.42	0.67	0.73	-0.0756321	9.71437	0.196262	0.299107	0.453416
5	290	2.13	2.31	1.75	0.922078	8.61053	2.18	2.72	2.08	0.801471	12.3336	0.05	0.41	0.33	-0.120607	3.72304	0.0234742	0.177489	0.188571
5	290	2.1	2.27	1.75	0.92511	8.34225	2.11	2.82	2.15	0.748227	12.7929	0.01	0.55	0.4	-0.176883	4.45068	0.0047619	0.242291	0.228571
5	290	1.95	2.2	1.64	0.886364	7.0356	2.52	2.34	2.03	1.07692	11.9705	0.57	0.14	0.39	0.190559	4.9349	0.292308	0.0636364	0.237805
5	290	2.11	2.33	1.76	0.905579	8.65269	1.89	2.46	1.97	0.768293	9.15932	-0.22	0.13	0.21	-0.137287	0.50663	-0.104265	0.055794	0.119318
5	290	2	2.33	1.74	0.858369	8.1084	2.15	3.14	1.95	0.684713	13.1645	0.15	0.81	0.21	-0.173656	5.05605	0.075	0.347639	0.12069
5	290	1.96	2.31	1.74	0.848485	7.87802	2.17	2.74	1.89	0.791971	11.2376	0.21	0.43	0.15	-0.056514	3.35954	0.107143	0.186147	0.0862069
5	290	2.07	2.26	1.72	0.915929	8.0465	2.02	3.01	1.89	0.671096	11.4916	-0.05	0.75	0.17	-0.244833	3.44507	-0.0241546	0.331858	0.0988372
5	290	2.11	2.3	1.8	0.917391	8.7354	2.07	2.42	1.6	0.855372	8.01504	-0.04	0.12	-0.2	-0.0620194	-0.72036	-0.0189573	0.0521739	-0.111111
5	290	1.95	2.32	1.79	0.840517	8.09796	2.16	3.22	2	0.670807	13.9104	0.21	0.9	0.21	-0.16971	5.81244	0.107692	0.387931	0.117318
5	290	2.25	2.09	1.6	1.07656	7.524	2.32	2.48	1.85	0.935484	10.6442	0.07	0.39	0.25	-0.141071	3.12016	0.0311111	0.186603	0.15625
5	290	2.45	2.2	1.86	1.11364	10.0254	2.47	2.57	2.16	0.961089	13.7115	0.02	0.37	0.3	-0.152547	3.68606	0.00816327	0.168182	0.16129
5	290	2.13	2.21	1.68	0.963801	7.90826	2.46	2.81	2.16	0.875445	14.9312	0.33	0.6	0.48	-0.0883561	7.02295	0.15493	0.271493	0.285714
5	290	2.18	2.24	1.65	0.973214	8.05728	2.31	3.02	1.95	0.764901	13.6036	0.13	0.78	0.3	-0.208314	5.54631	0.059633	0.348214	0.181818
5	290	2.07	2.39	1.83	0.866109	9.05356	2.09	2.74	2.18	0.762774	12.484	0.02	0.35	0.35	-0.103335	3.43043	0.00966184	0.146444	0.191257
5	290	2.03	2.37	1.79	0.85654	8.61187	2.31	2.48	1.87	0.931452	10.7129	0.28	0.11	0.08	0.0749115	2.10099	0.137931	0.0464135	0.0446927
5	290	2.1	2.33	1.8	0.901288	8.8074	1.95	3.17	2.04	0.615142	12.6103	-0.15	0.84	0.24	-0.286146	3.80286	-0.0714286	0.360515	0.133333
5	290	2.11	2.18	1.58	0.96789	7.26768	2.56	2.67	1.98	0.958801	13.5337	0.45	0.49	0.4	-0.00908841	6.26601	0.21327	0.224771	0.253165
5	290	1.91	2.38	1.84	0.802521	8.36427	2.47	3.35	1.82	0.737313	15.0596	0.56	0.97	-0.02	-0.0652076	6.69532	0.293194	0.407563	-0.0108696
5	290	1.97	2.28	1.74	0.864035	7.81538	2.17	3.23	2.07	0.671827	14.5088	0.2	0.95	0.33	-0.192208	6.69345	0.101523	0.416667	0.189655
5	290	1.98	2.28	1.63	0.868421	7.35847	2.39	3.87	1.98	0.617571	18.3136	0.41	1.59	0.35	-0.25085	10.9551	0.207071	0.697368	0.214724
1	300	2.32	2.13	1.61	1.0892	7.95598	2.35	3.5	2.39	0.671429	19.6578	0.03	1.37	0.78	-0.417773	11.7018	0.012931	0.643192	0.484472
1	300	1.91	2.23	1.73	0.856502	7.36859	2.4	3.07	2.09	0.781759	15.3991	0.49	0.84	0.36	-0.0747433	8.03053	0.256545	0.376682	0.208092
1	300	2.22	2.29	1.81	0.969432	9.20168	2.32	3.8	2.5	0.610526	22.04	0.1	1.51	0.69	-0.358906	12.8383	0.045045	0.659389	0.381215
1	300	2.04	2.34	1.76	0.871795	8.40154	3	3.32	2.19	0.903614	21.8124	0.96	0.98	0.43	0.0318196	13.4109	0.470588	0.418803	0.244318
1	300	2.01	2.34	1.76	0.858974	8.27798	2.19	2.71	2.06	0.808118	12.2259	0.18	0.37	0.3	-0.0508563	3.94791	0.0895522	0.15812	0.170455
1	300	2.22	2.35	1.76	0.944681	9.18192	3.03	3.2	2.41	0.946875	23.3674	0.81	0.85	0.65	0.00219415	14.1854	0.364865	0.361702	0.369318
1	300	2.07	2.24	1.61	0.924107	7.46525	2.21	2.91	2.04	0.75945	13.1194	0.14	0.67	0.43	-0.164657	5.6542	0.0676329	0.299107	0.267081
1	300	2.45	2.21	1.67	1.1086	9.04222	2.29	3.18	2.07	0.720126	15.0742	-0.16	0.97	0.4	-0.388471	6.03194	-0.0653061	0.438914	0.239521
1	300	2.11	2.18	1.81	0.96789	8.32564	2.6	2.98	1.9	0.872483	14.7212	0.49	0.8	0.09	-0.0954067	6.39556	0.232227	0.366972	0.0497238
1	300	1.86	2.17	1.75	0.857143	7.06335	2.51	3.12	2.62	0.804487	20.5177	0.65	0.95	0.87	-0.0526557	13.4544	0.349462	0.437788	0.497143
1	300	2.54	2.34	1.73	1.08547	10.2824	2.56	3.11	2.2	0.823151	17.5155	0.02	0.77	0.47	-0.262319	7.23309	0.00787402	0.32906	0.271676
1	300	2.15	2.29	1.7	0.938865	8.36995	2.41	3.56	1.92	0.676966	16.4728	0.26	1.27	0.22	-0.261898	8.10288	0.12093	0.554585	0.129412
1	300	2.11	2.28	1.62	0.925439	7.7935	2.24	3	2.31	0.746667	15.5232	0.13	0.72	0.69	-0.178772	7.7297	0.0616114	0.315789	0.425926
1	300	2.21	2.26	1.6	0.977876	7.99136	2.52	3.53	2.35	0.713881	20.9047	0.31	1.27	0.75	-0.263995	12.9133	0.140271	0.561947	0.46875
1	300	2.41	2.32	1.7	1.03879	9.50504	2.28	3.07	1.99	0.742671	13.9292	-0.13	0.75	0.29	-0.296122	4.42416	-0.0539419	0.323276	0.170588
1	300	1.93	2.15	1.65	0.897674	6.84667	2.42	3.34	2.17	0.724551	17.5397	0.49	1.19	0.52	-0.173124	10.693	0.253886	0.553488	0.315152
1	300	2.08	2.32	1.73	0.896552	8.34829	2.4	3.5	1.98	0.685714	16.632	0.32	1.18	0.25	-0.210837	8.28371	0.153846	0.508621	0.144509
1	300	2.01	2.33	1.79	0.862661	8.38311	2.29	3.09	2.03	0.7411	14.3645	0.28	0.76	0.24	-0.121561	5.98138	0.139303	0.32618	0.134078
1	300	2.08	2.25	1.75	0.924444	8.19	2.07	3.31	2.44	0.625378	16.7181	-0.01	1.06	0.69	-0.299067	8.52815	-0.00480769	0.471111	0.394286
1	300	2.12	2.23	1.72	0.950673	8.13147	2.27	2.85	1.97	0.796491	12.7449	0.15	0.62	0.25	-0.154181	4.61344	0.0707547	0.278027	0.145349
3	300	2.06	2.35	1.78	0.876596	8.61698	2.22	2.78	2.02	0.798561	12.4666	0.16	0.43	0.24	-0.0780346	3.84965	0.0776699	0.182979	0.134831
3	300	2.01	2.33	1.78	0.862661	8.33627	2.16	2.79	2.21	0.774194	13.3183	0.15	0.46	0.43	-0.0884674	4.98207	0.0746269	0.197425	0.241573
3	300	2.07	2.27	1.8	0.911894	8.45802	2.23	3.17	2.05	0.70347	14.4917	0.16	0.9	0.25	-0.208424	6.03363	0.0772947	0.396476	0.138889
3	300	2.19	2.39	1.73	0.916318	9.05499	2.56	3.43	2.26	0.746356	19.8446	0.37	1.04	0.53	-0.169962	10.7896	0.16895	0.435146	0.306358
3	300	2.19	2.26	1.72	0.969027	8.51297	2.35	2.95	1.84	0.79661	12.7558	0.16	0.69	0.12	-0.172416	4.24283	0.0730594	0.30531	0.0697674
3	300	2.06	2.3	1.71	0.895652	8.10198	2.46	2.66	2.07	0.924812	13.5453	0.4	0.36	0.36	0.0291599	5.44327	0.194175	0.156522	0.210526
3	300	2.23	2.32	1.63	0.961207	8.43297	2.31	2.88	2.23	0.802083	14.8357	0.08	0.56	0.6	-0.159124	6.40278	0.0358744	0.241379	0.368098
3	300	1.95	2.32	1.77	0.840517	8.00748	2.47	3	2.73	0.823333	20.2293	0.52	0.68	0.96	-0.0171839	12.2218	0.266667	0.293103	0.542373
3	300	2.15	2.35	1.7	0.914894	8.58925	2.58	3.4	2.66	0.758824	23.3335	0.43	1.05	0.96	-0.15607	14.7443	0.2	0.446809	0.564706
3	300	2.13	2.4	1.73	0.8875	8.84376	2.48	3.13	2.33	0.792332	18.0864	0.35	0.73	0.6	-0.0951677	9.24263	0.164319	0.304167	0.346821
3	300	2.1	2.4	1.82	0.875	9.1728	2.44	2.8	2.55	0.871429	17.4216	0.34	0.4	0.73	-0.00357143	8.2488	0.161905	0.166667	0.401099
3	300	2.21	2.21	1.67	1	8.15645	2.63	3.43	2.84	0.766764	25.6194	0.42	1.22	1.17	-0.233236	17.4629	0.190045	0.552036	0.700599
3	300	2.14	2.27	1.73	0.942731	8.40399	2.23	3.15	2.2	0.707937	15.4539	0.09	0.88	0.47	-0.234795	7.04991	0.0420561	0.387665	0.271676
3	300	2.13	2.28	1.69	0.934211	8.20732	2.01	3.82	2.15	0.526178	16.5081	-0.12	1.54	0.46	-0.408033	8.30081	-0.056338	0.675439	0.272189
3	300	2.24	2.29	1.7	0.978166	8.72032	2.29	3.38	2.17	0.677515	16.7962	0.05	1.09	0.47	-0.300651	8.07591	0.0223214	0.475983	0.276471
3	300	2.08	2.33	1.58	0.892704	7.65731	2.57	3.2	2.43	0.803125	19.9843	0.49	0.87	0.85	-0.0895789	12.327	0.235577	0.373391	0.537975
3	300	2.36	2.37	1.71	0.995781	9.56437	2.41	3.28	2.47	0.734756	19.5249	0.05	0.91	0.76	-0.261024	9.96048	0.0211864	0.383966	0.444444
3	300	2.08	2.38	1.79	0.87395	8.86122	2.63	3.1	2.58	0.848387	21.0347	0.55	0.72	0.79	-0.0255625	12.1735	0.264423	0.302521	0.441341
3	300	2.28	2.32	1.73	0.982759	9.15101	2.59	2.93	2.34	0.883959	17.7576	0.31	0.61	0.61	-0.0987996	8.60655	0.135965	0.262931	0.352601
3	300	2.22	2.26	1.71	0.982301	8.57941	1.73	4.07	2.69	0.425061	18.9406	-0.49	1.81	0.98	-0.557239	10.3611	-0.220721	0.800885	0.573099
5	300	2.16	2.41	1.77	0.896266	9.21391	1.92	2.97	2.09	0.646465	11.918	-0.24	0.56	0.32	-0.249801	2.7041	-0.111111	0.232365	0.180791
5	300	1.98	2.36	1.82	0.838983	8.5045	2.02	3.22	1.94	0.627329	12.6185	0.04	0.86	0.12	-0.211654	4.11404	0.020202	0.364407	0.0659341
5	300	2.36	2.29	1.6	1.03057	8.64704	2.44	2.06	1.72	1.18447	8.64541	0.08	-0.23	0.12	0.153898	-0.001632	0.0338983	-0.100437	0.075
5	300	2.14	2.26	1.69	0.946903	8.17352	2.25	2.55	1.7	0.882353	9.75375	0.11	0.29	0.01	-0.0645497	1.58023	0.0514019	0.128319	0.00591716
5	300	2.31	2.46	1.77	0.939024	10.0582	2.04	2.84	1.94	0.71831	11.2396	-0.27	0.38	0.17	-0.220715	1.18138	-0.116883	0.154472	0.0960452
5	300	2.08	2.27	1.7	0.9163	8.02672	2.44	3	1.82	0.813333	13.3224	0.36	0.73	0.12	-0.102966	5.29568	0.173077	0.321586	0.0705882
5	300	2.06	2.15	1.77	0.95814	7.83933	2.34	3.05	2.06	0.767213	14.7022	0.28	0.9	0.29	-0.190926	6.86289	0.135922	0.418605	0.163842
5	300	2.13	2.32	1.68	0.918103	8.30189	2.37	2.71	2	0.874539	12.8454	0.24	0.39	0.32	-0.0435647	4.54351	0.112676	0.168103	0.190476
5	300	2.01	2.31	1.71	0.87013	7.9397	2.01	3.08	2.03	0.652597	12.5673	0	0.77	0.32	-0.217532	4.62762	0	0.333333	0.187135
5	300	1.94	2.21	1.73	0.877828	7.4172	2.07	2.16	1.96	0.958333	8.76355	0.13	-0.05	0.23	0.0805053	1.34635	0.0670103	-0.0226244	0.132948
5	300	2.23	2.34	1.85	0.952991	9.65367	2.35	2.84	2.02	0.827465	13.4815	0.12	0.5	0.17	-0.125527	3.82781	0.0538117	0.213675	0.0918919
5	300	2.12	2.34	1.76	0.905983	8.73101	2.15	3.22	2.52	0.667702	17.446	0.03	0.88	0.76	-0.238281	8.71495	0.0141509	0.376068	0.431818
5	300	1.96	2.3	1.71	0.852174	7.70868	2.14	3.09	2.24	0.692557	14.8122	0.18	0.79	0.53	-0.159617	7.10354	0.0918367	0.343478	0.309942
5	300	2.04	2.32	1.82	0.87931	8.6137	2.31	2.86	2.29	0.807692	15.1291	0.27	0.54	0.47	-0.071618	6.51542	0.132353	0.232759	0.258242
5	300	1.97	2.24	1.76	0.879464	7.76653	2.22	3.32	2.34	0.668675	17.2467	0.25	1.08	0.58	-0.21079	9.48021	0.126904	0.482143	0.329545
5	300	2.01	2.25	1.64	0.893333	7.4169	2.32	2.79	2.45	0.831541	15.8584	0.31	0.54	0.81	-0.0617921	8.44146	0.154229	0.24	0.493902
5	300	2.2	2.34	1.79	0.940171	9.21492	2.18	2.86	2.08	0.762238	12.9684	-0.02	0.52	0.29	-0.177933	3.75346	-0.00909091	0.222222	0.162011
5	300	2.08	2.34	1.72	0.888889	8.37158	2.55	2.85	2.29	0.894737	16.6426	0.47	0.51	0.57	0.00584795	8.27099	0.225962	0.217949	0.331395
5	300	2.09	2.24	1.63	0.933036	7.63101	N/A	N/A	N/A
5	300	1.88	2.36	1.74	0.79661	7.72003	N/A	N/A	N/A

## Sheet: Foxtail Millet
Time (h)	Temperature (℃)	Before Carbonization					After Carbonization
		Length (mm)	Width (mm)	Thickness (mm)	L/W ratio	Volume (mm³)	Length (mm)	Width (mm)	Thickness (mm)	L/W ratio	Volume (mm³)	Length variation	Width variation	Thickness variation	L/W ratio variation	Volume variation	Shrinkage of length	Shrinkage of Width	Shrinkage of Thickness
1	240	1.52	1.92	1.51	0.791667	4.40678	1.51	1.58	1.41	0.955696	3.36398	-0.01	-0.34	-0.1	0.16403	-1.04281	-0.00657895	-0.177083	-0.0662252
1	240	1.56	1.8	1.32	0.866667	3.70656	1.18	1.5	0.94	0.786667	1.6638	-0.38	-0.3	-0.38	-0.08	-2.04276	-0.24359	-0.166667	-0.287879
1	240	1.63	1.8	1.33	0.905556	3.90222	1.17	1.67	1.19	0.700599	2.32514	-0.46	-0.13	-0.14	-0.204957	-1.57708	-0.282209	-0.0722222	-0.105263
1	240	1.29	1.7	1.25	0.758824	2.74125	1.51	1.66	1.25	0.909639	3.13325	0.22	-0.04	0	0.150815	0.392	0.170543	-0.0235294	0
1	240	1.6	1.82	1.47	0.879121	4.28064	1.33	1.65	1.33	0.806061	2.91869	-0.27	-0.17	-0.14	-0.0730603	-1.36196	-0.16875	-0.0934066	-0.0952381
1	240	1.31	1.56	1.38	0.839744	2.82017	1.27	1.54	1.32	0.824675	2.58166	-0.04	-0.02	-0.06	-0.0150683	-0.238512	-0.0305344	-0.0128205	-0.0434783
1	240	1.13	1.57	1.12	0.719745	1.98699	1.17	1.75	1.35	0.668571	2.76412	0.04	0.18	0.23	-0.0511738	0.777133	0.0353982	0.11465	0.205357
1	240	1.41	1.79	1.37	0.787709	3.45774	1.52	1.7	1.45	0.894118	3.7468	0.11	-0.09	0.08	0.106408	0.289057	0.0780142	-0.0502793	0.0583942
1	240	1.52	1.78	1.41	0.853933	3.8149	1.45	1.72	1.34	0.843023	3.34196	-0.07	-0.06	-0.07	-0.0109093	-0.472936	-0.0460526	-0.0337079	-0.0496454
1	240	1.69	1.44	1.49	1.17361	3.62606	1.59	1.7	1.28	0.935294	3.45984	-0.1	0.26	-0.21	-0.238317	-0.166224	-0.0591716	0.180556	-0.14094
1	240	1.32	1.87	1.46	0.705882	3.60386	1.29	1.6	1.19	0.80625	2.45616	-0.03	-0.27	-0.27	0.100368	-1.1477	-0.0227273	-0.144385	-0.184932
1	240	1.49	1.66	1.36	0.89759	3.36382	1.48	1.68	1.35	0.880952	3.35664	-0.01	0.02	-0.01	-0.016638	-0.007184	-0.00671141	0.0120482	-0.00735294
1	240	1.31	1.74	1.3	0.752874	2.96322	1.46	1.78	1.27	0.820225	3.30048	0.15	0.04	-0.03	0.0673512	0.337256	0.114504	0.0229885	-0.0230769
1	240	1.61	1.76	1.31	0.914773	3.71202	1.48	1.77	1.26	0.836158	3.3007	-0.13	0.01	-0.05	-0.0786145	-0.41132	-0.0807453	0.00568182	-0.0381679
1	240	1.21	1.79	1.3	0.675978	2.81567	1.48	1.77	1.27	0.836158	3.32689	0.27	-0.02	-0.03	0.160181	0.511222	0.22314	-0.0111732	-0.0230769
1	240	1.21	1.68	1.18	0.720238	2.3987	1.56	1.69	1.28	0.923077	3.37459	0.35	0.01	0.1	0.202839	0.975888	0.289256	0.00595238	0.0847458
1	240	1.72	1.81	1.4	0.950276	4.35848	1.42	1.66	1.15	0.855422	2.71078	-0.3	-0.15	-0.25	-0.0948546	-1.6477	-0.174419	-0.0828729	-0.178571
1	240	1.53	1.87	1.36	0.818182	3.8911	1.37	1.61	1.16	0.850932	2.55861	-0.16	-0.26	-0.2	0.0327499	-1.33248	-0.104575	-0.139037	-0.147059
1	240	1.41	1.8	1.31	0.783333	3.32478	1.4	1.69	1.27	0.828402	3.00482	-0.01	-0.11	-0.04	0.045069	-0.31996	-0.0070922	-0.0611111	-0.0305344
1	240	1.38	1.76	1.24	0.784091	3.01171	1.17	1.54	1.15	0.75974	2.07207	-0.21	-0.22	-0.09	-0.0243506	-0.939642	-0.152174	-0.125	-0.0725806
3	240	1.42	1.82	1.33	0.78022	3.43725	1.12	1.54	1.03	0.727273	1.77654	-0.3	-0.28	-0.3	-0.0529471	-1.66071	-0.211268	-0.153846	-0.225564
3	240	1.5	1.72	1.29	0.872093	3.3282	1.32	1.75	1.37	0.754286	3.1647	-0.18	0.03	0.08	-0.117807	-0.1635	-0.12	0.0174419	0.0620155
3	240	1.1	1.72	1.27	0.639535	2.40284	1.04	1.57	1.21	0.66242	1.97569	-0.06	-0.15	-0.06	0.0228855	-0.427152	-0.0545455	-0.0872093	-0.0472441
3	240	1.28	1.63	1.17	0.785276	2.44109	1.51	1.68	1.21	0.89881	3.06953	0.23	0.05	0.04	0.113533	0.62844	0.179687	0.0306748	0.034188
3	240	1.62	1.84	1.29	0.880435	3.84523	1.16	1.62	1.32	0.716049	2.48054	-0.46	-0.22	0.03	-0.164385	-1.36469	-0.283951	-0.119565	0.0232558
3	240	1.42	1.75	1.32	0.811429	3.2802	1.55	1.67	1.13	0.928144	2.925	0.13	-0.08	-0.19	0.116715	-0.355195	0.0915493	-0.0457143	-0.143939
3	240	1.31	1.83	1.37	0.715847	3.2843	1.08	1.57	1.13	0.687898	1.91603	-0.23	-0.26	-0.24	-0.0279489	-1.36827	-0.175573	-0.142077	-0.175182
3	240	1.6	1.75	1.5	0.914286	4.2	1.35	1.62	1.09	0.833333	2.38383	-0.25	-0.13	-0.41	-0.0809524	-1.81617	-0.15625	-0.0742857	-0.273333
3	240	1.5	1.67	1.2	0.898204	3.006	1.36	1.52	1.19	0.894737	2.45997	-0.14	-0.15	-0.01	-0.00346675	-0.546032	-0.0933333	-0.0898204	-0.00833333
3	240	1.43	1.64	1.3	0.871951	3.04876	1.4	1.56	1.09	0.897436	2.38056	-0.03	-0.08	-0.21	0.0254847	-0.6682	-0.020979	-0.0487805	-0.161538
3	240	1.36	1.72	1.33	0.790698	3.11114	1.66	1.69	1.3	0.982249	3.64702	0.3	-0.03	-0.03	0.191551	0.535884	0.220588	-0.0174419	-0.0225564
3	240	1.61	1.82	1.32	0.884615	3.86786	1.3	1.53	1.24	0.849673	2.46636	-0.31	-0.29	-0.08	-0.0349422	-1.4015	-0.192547	-0.159341	-0.0606061
3	240	1.41	1.76	1.45	0.801136	3.59832	1.42	1.69	1.26	0.840237	3.02375	0.01	-0.07	-0.19	0.0391003	-0.574572	0.0070922	-0.0397727	-0.131034
3	240	1.56	1.87	1.31	0.834225	3.82153	1.18	1.69	1.23	0.698225	2.45287	-0.38	-0.18	-0.08	-0.136	-1.36867	-0.24359	-0.0962567	-0.0610687
3	240	1.47	1.7	1.27	0.864706	3.17373	1.39	1.68	1.38	0.827381	3.22258	-0.08	-0.02	0.11	-0.0373249	0.048846	-0.0544218	-0.0117647	0.0866142
3	240	1.39	1.57	1.4	0.88535	3.05522	1.09	1.68	1.24	0.64881	2.27069	-0.3	0.11	-0.16	-0.236541	-0.784532	-0.215827	0.0700637	-0.114286
3	240	1.44	1.77	1.5	0.813559	3.8232	1.33	1.72	1.36	0.773256	3.11114	-0.11	-0.05	-0.14	-0.0403035	-0.712064	-0.0763889	-0.0282486	-0.0933333
3	240	1.19	1.64	1.28	0.72561	2.49805	1.39	1.66	1.34	0.837349	3.09192	0.2	0.02	0.06	0.11174	0.593868	0.168067	0.0121951	0.046875
3	240	1.22	1.84	1.32	0.663043	2.96314	1.35	1.52	1.23	0.888158	2.52396	0.13	-0.32	-0.09	0.225114	-0.439176	0.106557	-0.173913	-0.0681818
3	240	1.37	1.87	1.4	0.73262	3.58666	1.23	1.61	1.41	0.763975	2.79222	-0.14	-0.26	0.01	0.0313548	-0.794437	-0.10219	-0.139037	0.00714286
5	240	1.57	1.8	1.41	0.872222	3.98466	1.48	1.72	1.29	0.860465	3.28382	-0.09	-0.08	-0.12	-0.0117571	-0.700836	-0.0573248	-0.0444444	-0.0851064
5	240	1.66	1.91	1.39	0.86911	4.40713	1.48	2.11	1.37	0.701422	4.27824	-0.18	0.2	-0.02	-0.167688	-0.128898	-0.108434	0.104712	-0.0143885
5	240	1.21	1.78	1.34	0.679775	2.88609	1.49	1.86	1.37	0.801075	3.79682	0.28	0.08	0.03	0.1213	0.910726	0.231405	0.0449438	0.0223881
5	240	1.53	1.76	1.15	0.869318	3.09672	1.51	2.34	1.49	0.645299	5.26477	-0.02	0.58	0.34	-0.224019	2.16805	-0.0130719	0.329545	0.295652
5	240	1.58	1.65	1.11	0.957576	2.89377	1.56	2.11	1.49	0.739336	4.90448	-0.02	0.46	0.38	-0.218239	2.01071	-0.0126582	0.278788	0.342342
5	240	1.46	1.62	1.17	0.901235	2.76728	1.38	1.72	1.26	0.802326	2.99074	-0.08	0.1	0.09	-0.098909	0.223452	-0.0547945	0.0617284	0.0769231
5	240	1.43	1.86	1.36	0.768817	3.61733	1.63	1.99	1.25	0.819095	4.05462	0.2	0.13	-0.11	0.0502783	0.437297	0.13986	0.0698925	-0.0808824
5	240	1.56	1.73	1.3	0.901734	3.50844	1.28	1.98	1.56	0.646465	3.95366	-0.28	0.25	0.26	-0.255269	0.445224	-0.179487	0.144509	0.2
5	240	1.43	1.75	1.29	0.817143	3.22823	1.66	2.34	1.46	0.709402	5.67122	0.23	0.59	0.17	-0.107741	2.443	0.160839	0.337143	0.131783
5	240	1.61	1.8	1.32	0.894444	3.82536	1.41	2.25	1.54	0.626667	4.88565	-0.2	0.45	0.22	-0.267778	1.06029	-0.124224	0.25	0.166667
5	240	1.51	1.74	1.4	0.867816	3.67836	1.63	2.13	1.47	0.765258	5.10369	0.12	0.39	0.07	-0.102558	1.42533	0.0794702	0.224138	0.05
5	240	1.55	1.79	1.29	0.865922	3.57911	1.62	2.08	1.44	0.778846	4.85222	0.07	0.29	0.15	-0.0870756	1.27312	0.0451613	0.162011	0.116279
5	240	1.38	1.71	1.42	0.807018	3.35092	1.64	2.17	1.33	0.75576	4.7332	0.26	0.46	-0.09	-0.0512572	1.38229	0.188406	0.269006	-0.0633803
5	240	1.41	1.77	1.33	0.79661	3.31928	1.52	2.14	1.42	0.71028	4.61898	0.11	0.37	0.09	-0.0863298	1.2997	0.0780142	0.20904	0.0676692
5	240	1.35	1.75	1.35	0.771429	3.18938	1.3	2.4	1.51	0.541667	4.7112	-0.05	0.65	0.16	-0.229762	1.52182	-0.037037	0.371429	0.118519
5	240	1.37	1.86	1.38	0.736559	3.51652	1.51	2.15	1.38	0.702326	4.48017	0.14	0.29	0	-0.0342336	0.963654	0.10219	0.155914	0
5	240	1.51	1.72	1.28	0.877907	3.32442	1.52	2.03	1.37	0.748768	4.22727	0.01	0.31	0.09	-0.129139	0.902856	0.00662252	0.180233	0.0703125
5	240	1.3	1.75	1.39	0.742857	3.16225	1.44	2.46	1.36	0.585366	4.81766	0.14	0.71	-0.03	-0.157491	1.65541	0.107692	0.405714	-0.0215827
5	240	1.36	1.63	1.36	0.834356	3.01485	1.62	2.24	1.36	0.723214	4.93517	0.26	0.61	0	-0.111142	1.92032	0.191176	0.374233	0
5	240	1.49	1.79	1.24	0.832402	3.3072	1.36	2.35	1.39	0.578723	4.44244	-0.13	0.56	0.15	-0.253679	1.13524	-0.0872483	0.312849	0.120968
1	250	1.42	1.88	1.24	0.755319	3.3103	1.34	1.27	0.84	1.05512	1.42951	-0.08	-0.61	-0.4	0.299799	-1.88079	-0.056338	-0.324468	-0.322581
1	250	1.6	1.68	1.24	0.952381	3.33312	1.55	1.86	1.45	0.833333	4.18035	-0.05	0.18	0.21	-0.119048	0.84723	-0.03125	0.107143	0.169355
1	250	1.51	1.79	1.25	0.843575	3.37862	1.5	1.67	1.15	0.898204	2.88075	-0.01	-0.12	-0.1	0.0546282	-0.497875	-0.00662252	-0.0670391	-0.08
1	250	1.37	1.71	1.23	0.80117	2.88152	1.51	1.78	1.16	0.848315	3.11785	0.14	0.07	-0.07	0.047145	0.236327	0.10219	0.0409357	-0.0569106
1	250	1.17	1.8	1.34	0.65	2.82204	1.7	1.81	1.35	0.939227	4.15395	0.53	0.01	0.01	0.289227	1.33191	0.452991	0.00555556	0.00746269
1	250	1.29	1.6	1.19	0.80625	2.45616	1.52	1.64	1.21	0.926829	3.01629	0.23	0.04	0.02	0.120579	0.560128	0.178295	0.025	0.0168067
1	250	1.08	1.71	1.16	0.631579	2.14229	1.45	1.7	1.34	0.852941	3.3031	0.37	-0.01	0.18	0.221362	1.16081	0.342593	-0.00584795	0.155172
1	250	1.58	1.76	1.22	0.897727	3.39258	1.56	1.81	1.27	0.861878	3.58597	-0.02	0.05	0.05	-0.0358488	0.193396	-0.0126582	0.0284091	0.0409836
1	250	1.39	1.82	1.29	0.763736	3.26344	1.51	1.66	1.31	0.909639	3.28365	0.12	-0.16	0.02	0.145902	0.020204	0.0863309	-0.0879121	0.0155039
1	250	1.5	1.85	1.29	0.810811	3.57975	1.4	1.66	1.2	0.843373	2.7888	-0.1	-0.19	-0.09	0.0325627	-0.79095	-0.0666667	-0.102703	-0.0697674
1	250	1.34	1.71	1.2	0.783626	2.74968	1.39	1.67	1.25	0.832335	2.90163	0.05	-0.04	0.05	0.0487096	0.151945	0.0373134	-0.0233918	0.0416667
1	250	1.37	1.35	1.11	1.01481	2.05295	1.62	1.79	1.36	0.905028	3.94373	0.25	0.44	0.25	-0.109787	1.89078	0.182482	0.325926	0.225225
1	250	1.41	1.72	1.3	0.819767	3.15276	1.42	1.69	1.29	0.840237	3.09574	0.01	-0.03	-0.01	0.0204692	-0.057018	0.0070922	-0.0174419	-0.00769231
1	250	1.47	1.72	1.25	0.854651	3.1605	1.31	1.84	1.24	0.711957	2.9889	-0.16	0.12	-0.01	-0.142695	-0.171604	-0.108844	0.0697674	-0.008
1	250	1.52	1.85	1.29	0.821622	3.62748	1.28	1.76	1.36	0.727273	3.06381	-0.24	-0.09	0.07	-0.0943489	-0.563672	-0.157895	-0.0486486	0.0542636
1	250	1.29	1.73	1.36	0.745665	3.03511	1.36	1.59	1.13	0.855346	2.44351	0.07	-0.14	-0.23	0.109681	-0.5916	0.0542636	-0.0809249	-0.169118
1	250	1.18	1.81	1.32	0.651934	2.81926	1.44	1.66	1.14	0.86747	2.72506	0.26	-0.15	-0.18	0.215536	-0.0942	0.220339	-0.0828729	-0.136364
1	250	1.5	1.73	1.32	0.867052	3.4254	1.52	1.81	1.2	0.839779	3.30144	0.02	0.08	-0.12	-0.027273	-0.12396	0.0133333	0.0462428	-0.0909091
1	250	1.52	1.8	1.42	0.844444	3.88512	1.3	1.76	1.18	0.738636	2.69984	-0.22	-0.04	-0.24	-0.105808	-1.18528	-0.144737	-0.0222222	-0.169014
1	250	1.6	1.67	1.34	0.958084	3.58048	1.3	1.76	1.28	0.738636	2.92864	-0.3	0.09	-0.06	-0.219447	-0.65184	-0.1875	0.0538922	-0.0447761
3	250	1.34	1.67	1.38	0.802395	3.08816	1.42	2.05	1.34	0.692683	3.90074	0.08	0.38	-0.04	-0.109712	0.812576	0.0597015	0.227545	-0.0289855
3	250	1.19	1.82	1.24	0.653846	2.68559	1.38	2.1	1.28	0.657143	3.70944	0.19	0.28	0.04	0.0032967	1.02385	0.159664	0.153846	0.0322581
3	250	1.54	1.71	1.26	0.900585	3.31808	1.35	1.97	1.35	0.685279	3.59032	-0.19	0.26	0.09	-0.215306	0.272241	-0.123377	0.152047	0.0714286
3	250	1.59	1.78	1.33	0.893258	3.76417	1.82	2.11	1.49	0.862559	5.7219	0.23	0.33	0.16	-0.0306992	1.95773	0.144654	0.185393	0.120301
3	250	1.41	1.72	1.33	0.819767	3.22552	1.46	2.14	1.36	0.682243	4.24918	0.05	0.42	0.03	-0.137524	1.02367	0.035461	0.244186	0.0225564
3	250	1.22	1.6	1.14	0.7625	2.22528	1.44	2.32	1.36	0.62069	4.54349	0.22	0.72	0.22	-0.14181	2.31821	0.180328	0.45	0.192982
3	250	1.6	1.73	1.27	0.924855	3.51536	1.58	2.37	1.52	0.666667	5.69179	-0.02	0.64	0.25	-0.258189	2.17643	-0.0125	0.369942	0.19685
3	250	1.62	1.72	1.17	0.94186	3.26009	1.46	1.59	1.48	0.918239	3.43567	-0.16	-0.13	0.31	-0.0236215	0.175584	-0.0987654	-0.0755814	0.264957
3	250	1.24	1.62	1.27	0.765432	2.55118	1.48	2.02	1.4	0.732673	4.18544	0.24	0.4	0.13	-0.0327588	1.63426	0.193548	0.246914	0.102362
3	250	1.33	1.68	1.22	0.791667	2.72597	1.38	2.36	1.43	0.584746	4.65722	0.05	0.68	0.21	-0.206921	1.93126	0.037594	0.404762	0.172131
3	250	1.32	1.63	1.33	0.809816	2.86163	1.16	2.1	1.31	0.552381	3.19116	-0.16	0.47	-0.02	-0.257435	0.329532	-0.121212	0.288344	-0.0150376
3	250	1.41	1.76	1.41	0.801136	3.49906	1.38	2.11	1.36	0.654028	3.96005	-0.03	0.35	-0.05	-0.147108	0.460992	-0.0212766	0.198864	-0.035461
3	250	1.26	1.7	1.24	0.741176	2.65608	1.38	2.19	1.5	0.630137	4.5333	0.12	0.49	0.26	-0.111039	1.87722	0.0952381	0.288235	0.209677
3	250	1.27	1.52	1.04	0.835526	2.00762	1.29	2.28	1.33	0.565789	3.9118	0.02	0.76	0.29	-0.269737	1.90418	0.015748	0.5	0.278846
3	250	1.5	1.77	1.17	0.847458	3.10635	1.43	2.05	1.44	0.697561	4.22136	-0.07	0.28	0.27	-0.149897	1.11501	-0.0466667	0.158192	0.230769
3	250	1.54	1.7	1.3	0.905882	3.4034	1.41	2.19	1.27	0.643836	3.92163	-0.13	0.49	-0.03	-0.262047	0.518233	-0.0844156	0.288235	-0.0230769
3	250	1.38	1.63	1.15	0.846626	2.58681	1.56	2.42	1.45	0.644628	5.47404	0.18	0.79	0.3	-0.201998	2.88723	0.130435	0.484663	0.26087
3	250	1.13	1.65	1.25	0.684848	2.33062	1.17	2.51	1.21	0.466135	3.55341	0.04	0.86	-0.04	-0.218713	1.22278	0.0353982	0.521212	-0.032
3	250	1.32	1.7	1.3	0.776471	2.9172	1.53	2.09	1.33	0.732057	4.25294	0.21	0.39	0.03	-0.0444132	1.33574	0.159091	0.229412	0.0230769
3	250	1.38	1.7	1.2	0.811765	2.8152	1.29	2.2	1.35	0.586364	3.8313	-0.09	0.5	0.15	-0.225401	1.0161	-0.0652174	0.294118	0.125
5	250	1.47	1.73	1.18	0.849711	3.00086	1.19	2.09	1.23	0.569378	3.05913	-0.28	0.36	0.05	-0.280333	0.058275	-0.190476	0.208092	0.0423729
5	250	1.56	1.81	1.31	0.861878	3.69892	1.38	2.13	1.28	0.647887	3.76243	-0.18	0.32	-0.03	-0.213991	0.063516	-0.115385	0.176796	-0.0229008
5	250	1.49	1.89	1.37	0.78836	3.85806	1.51	1.74	1.43	0.867816	3.75718	0.02	-0.15	0.06	0.0794563	-0.100875	0.0134228	-0.0793651	0.0437956
5	250	1.49	1.88	1.41	0.792553	3.94969	1.34	1.71	1.09	0.783626	2.49763	-0.15	-0.17	-0.32	-0.00892746	-1.45207	-0.100671	-0.0904255	-0.22695
5	250	1.37	1.77	1.41	0.774011	3.41911	1.09	2.11	1.16	0.516588	2.66788	-0.28	0.34	-0.25	-0.257424	-0.751225	-0.20438	0.19209	-0.177305
5	250	1.24	1.75	1.2	0.708571	2.604	1.28	2.12	1.21	0.603774	3.28346	0.04	0.37	0.01	-0.104798	0.679456	0.0322581	0.211429	0.00833333
5	250	1.7	1.86	1.31	0.913978	4.14222	1.25	2.06	1.29	0.606796	3.32175	-0.45	0.2	-0.02	-0.307182	-0.82047	-0.264706	0.107527	-0.0152672
5	250	1.44	1.86	1.46	0.774194	3.91046	1.15	2.2	1.5	0.522727	3.795	-0.29	0.34	0.04	-0.251466	-0.115464	-0.201389	0.182796	0.0273973
5	250	1.58	1.8	1.35	0.877778	3.8394	1.36	2.22	1.29	0.612613	3.89477	-0.22	0.42	-0.06	-0.265165	0.055368	-0.139241	0.233333	-0.0444444
5	250	1.54	1.6	1.09	0.9625	2.68576	1.34	2.07	1.23	0.647343	3.41177	-0.2	0.47	0.14	-0.315157	0.726014	-0.12987	0.29375	0.12844
5	250	1.56	1.79	1.27	0.871508	3.54635	1.17	1.87	1.16	0.625668	2.53796	-0.39	0.08	-0.11	-0.24584	-1.00838	-0.25	0.0446927	-0.0866142
5	250	1.4	1.81	1.46	0.773481	3.69964	1.6	1.94	1.53	0.824742	4.74912	0.2	0.13	0.07	0.0512616	1.04948	0.142857	0.0718232	0.0479452
5	250	1.44	1.84	1.34	0.782609	3.55046	1.35	2.1	1.3	0.642857	3.6855	-0.09	0.26	-0.04	-0.139752	0.135036	-0.0625	0.141304	-0.0298507
5	250	1.26	1.71	1.14	0.736842	2.45624	1.25	2.24	1.25	0.558036	3.5	-0.01	0.53	0.11	-0.178806	1.04376	-0.00793651	0.309942	0.0964912
5	250	1.74	1.82	1.24	0.956044	3.92683	1.25	2.15	1.32	0.581395	3.5475	-0.49	0.33	0.08	-0.374649	-0.379332	-0.281609	0.181319	0.0645161
5	250	1.15	1.79	1.21	0.642458	2.49078	1.78	2.34	1.35	0.760684	5.62302	0.63	0.55	0.14	0.118226	3.13223	0.547826	0.307263	0.115702
5	250	1.4	1.8	1.29	0.777778	3.2508	1.22	1.98	1.11	0.616162	2.68132	-0.18	0.18	-0.18	-0.161616	-0.569484	-0.128571	0.1	-0.139535
5	250	1.46	1.72	1.19	0.848837	2.98833	1.3	2.05	1.4	0.634146	3.731	-0.16	0.33	0.21	-0.214691	0.742672	-0.109589	0.19186	0.176471
5	250	1.56	1.67	1.26	0.934132	3.28255	1.49	2.11	1.23	0.706161	3.867	-0.07	0.44	-0.03	-0.227971	0.584445	-0.0448718	0.263473	-0.0238095
5	250	1.68	1.8	1.27	0.933333	3.84048	1.29	2.34	1.47	0.551282	4.43734	-0.39	0.54	0.2	-0.382051	0.596862	-0.232143	0.3	0.15748
1	260	1.31	1.82	1.33	0.71978	3.17099	1.29	2.31	1.45	0.558442	4.32085	-0.02	0.49	0.12	-0.161339	1.14987	-0.0152672	0.269231	0.0902256
1	260	1.63	1.74	1.33	0.936782	3.77215	1.03	2.13	1.32	0.483568	2.89595	-0.6	0.39	-0.01	-0.453214	-0.876198	-0.368098	0.224138	-0.0075188
1	260	1.33	1.75	1.31	0.76	3.04903	1.2	2.33	1.45	0.515021	4.0542	-0.13	0.58	0.14	-0.244979	1.00517	-0.0977444	0.331429	0.10687
1	260	1.51	1.84	1.31	0.820652	3.6397	1.57	2.39	1.47	0.656904	5.51588	0.06	0.55	0.16	-0.163748	1.87618	0.0397351	0.298913	0.122137
1	260	1.37	1.82	1.34	0.752747	3.34116	1.46	2.45	1.52	0.595918	5.43704	0.09	0.63	0.18	-0.156829	2.09588	0.0656934	0.346154	0.134328
1	260	1.47	1.64	1.25	0.896341	3.0135	1.32	1.97	1.36	0.670051	3.53654	-0.15	0.33	0.11	-0.226291	0.523044	-0.102041	0.20122	0.088
1	260	1.68	1.75	1.21	0.96	3.5574	1.27	1.98	1.51	0.641414	3.79705	-0.41	0.23	0.3	-0.318586	0.239646	-0.244048	0.131429	0.247934
1	260	1.56	1.68	1.2	0.928571	3.14496	1.37	2.36	1.45	0.580508	4.68814	-0.19	0.68	0.25	-0.348063	1.54318	-0.121795	0.404762	0.208333
1	260	1.49	1.85	1.48	0.805405	4.07962	1.43	2.5	1.57	0.572	5.61275	-0.06	0.65	0.09	-0.233405	1.53313	-0.0402685	0.351351	0.0608108
1	260	1.46	1.77	1.33	0.824859	3.43699	1.48	2.54	1.57	0.582677	5.90194	0.02	0.77	0.24	-0.242182	2.46496	0.0136986	0.435028	0.180451
1	260	1.08	1.76	1.22	0.613636	2.31898	1.22	1.69	1.28	0.721893	2.6391	0.14	-0.07	0.06	0.108257	0.320128	0.12963	-0.0397727	0.0491803
1	260	1.68	1.85	1.51	0.908108	4.69308	1.38	2.01	1.41	0.686567	3.91106	-0.3	0.16	-0.1	-0.221541	-0.782022	-0.178571	0.0864865	-0.0662252
1	260	1.44	1.63	1.12	0.883436	2.62886	1.3	1.87	1.35	0.695187	3.28185	-0.14	0.24	0.23	-0.188248	0.652986	-0.0972222	0.147239	0.205357
1	260	1.56	1.84	1.46	0.847826	4.19078	1.41	2.14	1.51	0.658879	4.55627	-0.15	0.3	0.05	-0.188948	0.36549	-0.0961538	0.163043	0.0342466
1	260	1.54	1.88	1.44	0.819149	4.16909	1.45	1.76	1.31	0.823864	3.34312	-0.09	-0.12	-0.13	0.0047147	-0.825968	-0.0584416	-0.0638298	-0.0902778
1	260	1.27	1.79	1.41	0.709497	3.20535	1.44	2.65	1.65	0.543396	6.2964	0.17	0.86	0.24	-0.166101	3.09105	0.133858	0.480447	0.170213
1	260	1.4	1.67	1.2	0.838323	2.8056	1.44	2.41	1.52	0.59751	5.27501	0.04	0.74	0.32	-0.240813	2.46941	0.0285714	0.443114	0.266667
1	260	1.49	1.78	1.43	0.837079	3.79265	1.88	2.2	1.68	0.854545	6.94848	0.39	0.42	0.25	0.0174668	3.15583	0.261745	0.235955	0.174825
1	260	1.64	1.79	1.34	0.916201	3.9337	N/A	N/A	N/A
1	260	1.2	1.86	1.36	0.645161	3.03552	N/A	N/A	N/A
3	260	1.17	1.72	1.15	0.680233	2.31426	1.48	2.13	1.26	0.694836	3.97202	0.31	0.41	0.11	0.0146031	1.65776	0.264957	0.238372	0.0956522
3	260	1.48	1.76	1.26	0.840909	3.28205	1.52	2.2	1.49	0.690909	4.98256	0.04	0.44	0.23	-0.15	1.70051	0.027027	0.25	0.18254
3	260	1.37	1.72	1.3	0.796512	3.06332	1.44	2.11	1.27	0.682464	3.85877	0.07	0.39	-0.03	-0.114047	0.795448	0.0510949	0.226744	-0.0230769
3	260	1.53	1.72	1.33	0.889535	3.50003	1.29	1.8	1.36	0.716667	3.15792	-0.24	0.08	0.03	-0.172868	-0.342108	-0.156863	0.0465116	0.0225564
3	260	1.67	1.81	1.36	0.922652	4.11087	1.45	2.2	1.5	0.659091	4.785	-0.22	0.39	0.14	-0.263561	0.674128	-0.131737	0.21547	0.102941
3	260	1.52	1.65	1.21	0.921212	3.03468	1.46	2.59	1.55	0.563707	5.86117	-0.06	0.94	0.34	-0.357506	2.82649	-0.0394737	0.569697	0.280992
3	260	1.69	1.84	1.24	0.918478	3.8559	1.71	2.25	1.31	0.76	5.04023	0.02	0.41	0.07	-0.158478	1.18432	0.0118343	0.222826	0.0564516
3	260	1.11	1.69	1.33	0.656805	2.49495	1.52	2.16	1.37	0.703704	4.49798	0.41	0.47	0.04	0.046899	2.00304	0.369369	0.278107	0.0300752
3	260	1.28	1.72	1.15	0.744186	2.53184	1.47	2.26	1.48	0.650442	4.91686	0.19	0.54	0.33	-0.0937436	2.38502	0.148437	0.313953	0.286957
3	260	1.45	1.7	1.35	0.852941	3.32775	1.42	2.14	1.42	0.663551	4.3151	-0.03	0.44	0.07	-0.18939	0.987346	-0.0206897	0.258824	0.0518519
3	260	1.45	1.76	1.32	0.823864	3.36864	1.52	2.09	1.29	0.727273	4.09807	0.07	0.33	-0.03	-0.0965909	0.729432	0.0482759	0.1875	-0.0227273
3	260	1.43	1.69	1.3	0.846154	3.14171	1.39	2.24	1.39	0.620536	4.3279	-0.04	0.55	0.09	-0.225618	1.18619	-0.027972	0.325444	0.0692308
3	260	1.57	1.72	1.4	0.912791	3.78056	1.28	2.36	1.36	0.542373	4.10829	-0.29	0.64	-0.04	-0.370418	0.327728	-0.184713	0.372093	-0.0285714
3	260	1.54	1.71	1.21	0.900585	3.18641	1.43	1.99	1.4	0.718593	3.98398	-0.11	0.28	0.19	-0.181992	0.797566	-0.0714286	0.163743	0.157025
3	260	1.61	1.79	1.32	0.899441	3.80411	1.31	2.46	1.45	0.53252	4.67277	-0.3	0.67	0.13	-0.366921	0.868662	-0.186335	0.374302	0.0984848
3	260	1.42	1.7	1.3	0.835294	3.1382	1.6	2.23	1.43	0.717489	5.10224	0.18	0.53	0.13	-0.117805	1.96404	0.126761	0.311765	0.1
3	260	1.34	1.76	1.23	0.761364	2.90083	1.53	2.11	1.42	0.725118	4.58419	0.19	0.35	0.19	-0.0362452	1.68335	0.141791	0.198864	0.154472
3	260	1.59	1.67	1.26	0.952096	3.34568	1.9	2.25	1.32	0.844444	5.643	0.31	0.58	0.06	-0.107651	2.29732	0.194969	0.347305	0.047619
3	260	1.48	1.66	1.47	0.891566	3.6115	1.4	2.73	1.27	0.512821	4.85394	-0.08	1.07	-0.2	-0.378746	1.24244	-0.0540541	0.644578	-0.136054
3	260	1.27	1.77	1.28	0.717514	2.87731	N/A	N/A	N/A
5	260	1.5	1.83	1.39	0.819672	3.81555	1.31	2.27	1.4	0.577093	4.16318	-0.19	0.44	0.01	-0.24258	0.34763	-0.126667	0.240437	0.00719424
5	260	1.38	1.82	1.38	0.758242	3.46601	1.33	1.92	1.34	0.692708	3.42182	-0.05	0.1	-0.04	-0.0655334	-0.044184	-0.0362319	0.0549451	-0.0289855
5	260	1.61	1.77	1.43	0.909605	4.07507	1.37	2.07	1.3	0.661836	3.68667	-0.24	0.3	-0.13	-0.247769	-0.388401	-0.149068	0.169492	-0.0909091
5	260	1.33	1.79	1.38	0.743017	3.28537	1.12	2.14	1.26	0.523364	3.01997	-0.21	0.35	-0.12	-0.219652	-0.265398	-0.157895	0.195531	-0.0869565
5	260	1.36	1.67	1.29	0.814371	2.92985	1.39	1.87	1.35	0.743316	3.50906	0.03	0.2	0.06	-0.0710557	0.579207	0.0220588	0.11976	0.0465116
5	260	1.48	1.75	1.32	0.845714	3.4188	1.38	2.16	1.19	0.638889	3.54715	-0.1	0.41	-0.13	-0.206825	0.128352	-0.0675676	0.234286	-0.0984848
5	260	1.6	1.71	1.32	0.935673	3.61152	1.39	1.81	1.24	0.767956	3.11972	-0.21	0.1	-0.08	-0.167717	-0.491804	-0.13125	0.0584795	-0.0606061
5	260	1.44	1.68	1.28	0.857143	3.09658	1.37	2.29	1.27	0.598253	3.98437	-0.07	0.61	-0.01	-0.25889	0.887795	-0.0486111	0.363095	-0.0078125
5	260	1.51	1.8	1.36	0.838889	3.69648	1.51	2.18	1.3	0.692661	4.27934	0	0.38	-0.06	-0.146228	0.58286	0	0.211111	-0.0441176
5	260	1.3	1.76	1.36	0.738636	3.11168	1.67	2.37	1.3	0.704641	5.14527	0.37	0.61	-0.06	-0.033995	2.03359	0.284615	0.346591	-0.0441176
5	260	1.46	1.66	1.32	0.879518	3.19915	1.4	2	1.11	0.7	3.108	-0.06	0.34	-0.21	-0.179518	-0.091152	-0.0410959	0.204819	-0.159091
5	260	1.56	1.8	1.29	0.866667	3.62232	1.56	2.03	1.56	0.768473	4.94021	0	0.23	0.27	-0.0981938	1.31789	0	0.127778	0.209302
5	260	1.39	1.78	1.29	0.780899	3.19172	1.45	2.06	1.27	0.703883	3.79349	0.06	0.28	-0.02	-0.0770154	0.601772	0.0431655	0.157303	-0.0155039
5	260	1.21	1.81	1.42	0.668508	3.10994	1.61	2.52	1.53	0.638889	6.20752	0.4	0.71	0.11	-0.0296194	3.09757	0.330579	0.392265	0.0774648
5	260	1.63	1.93	1.45	0.84456	4.56155	1.15	2.14	1.3	0.537383	3.1993	-0.48	0.21	-0.15	-0.307176	-1.36225	-0.294479	0.108808	-0.103448
5	260	1.22	1.68	1.29	0.72619	2.64398	1.18	1.77	1.15	0.666667	2.40189	-0.04	0.09	-0.14	-0.0595238	-0.242094	-0.0327869	0.0535714	-0.108527
5	260	1.45	1.65	1.4	0.878788	3.3495	1.4	2.21	1.32	0.633484	4.08408	-0.05	0.56	-0.08	-0.245304	0.73458	-0.0344828	0.339394	-0.0571429
5	260	1.69	1.76	1.32	0.960227	3.92621	1.17	2.22	1.3	0.527027	3.37662	-0.52	0.46	-0.02	-0.4332	-0.549588	-0.307692	0.261364	-0.0151515
5	260	1.2	1.76	1.44	0.681818	3.04128	1.34	1.99	1.24	0.673367	3.30658	0.14	0.23	-0.2	-0.00845135	0.265304	0.116667	0.130682	-0.138889
5	260	1.58	1.79	1.33	0.882682	3.76151	1.55	2.15	1.31	0.72093	4.36557	-0.03	0.36	-0.02	-0.161751	0.604069	-0.0189873	0.201117	-0.0150376
1	270	1.39	1.71	1.27	0.812865	3.01866	1.87	2.29	1.51	0.816594	6.46627	0.48	0.58	0.24	0.00372839	3.44761	0.345324	0.339181	0.188976
1	270	1.41	1.84	1.46	0.766304	3.78782	1.59	2.56	1.59	0.621094	6.47194	0.18	0.72	0.13	-0.145211	2.68411	0.12766	0.391304	0.0890411
1	270	1.61	1.68	1.34	0.958333	3.62443	1.75	2.49	1.82	0.702811	7.93065	0.14	0.81	0.48	-0.255522	4.30622	0.0869565	0.482143	0.358209
1	270	1.38	1.84	1.41	0.75	3.58027	1.41	2.23	1.33	0.632287	4.18192	0.03	0.39	-0.08	-0.117713	0.601647	0.0217391	0.211957	-0.0567376
1	270	1.42	1.77	1.23	0.80226	3.09148	1.66	2.61	1.79	0.636015	7.75535	0.24	0.84	0.56	-0.166245	4.66387	0.169014	0.474576	0.455285
1	270	1.43	1.84	1.34	0.777174	3.52581	1.56	2.78	1.48	0.561151	6.41846	0.13	0.94	0.14	-0.216023	2.89266	0.0909091	0.51087	0.104478
1	270	1.43	1.94	1.34	0.737113	3.71743	1.52	2.53	1.22	0.600791	4.69163	0.09	0.59	-0.12	-0.136323	0.974204	0.0629371	0.304124	-0.0895522
1	270	1.37	1.74	1.25	0.787356	2.97975	1.49	2.28	1.36	0.653509	4.62019	0.12	0.54	0.11	-0.133848	1.64044	0.0875912	0.310345	0.088
1	270	1.36	1.86	1.42	0.731183	3.59203	1.32	2.27	1.34	0.581498	4.01518	-0.04	0.41	-0.08	-0.149685	0.423144	-0.0294118	0.22043	-0.056338
1	270	1.29	1.89	1.4	0.68254	3.41334	1.71	2.63	1.68	0.65019	7.55546	0.42	0.74	0.28	-0.0323496	4.14212	0.325581	0.391534	0.2
1	270	1.41	1.8	1.21	0.783333	3.07098	1.7	2.55	1.56	0.666667	6.7626	0.29	0.75	0.35	-0.116667	3.69162	0.205674	0.416667	0.289256
1	270	1.61	1.95	1.31	0.825641	4.11275	1.61	2.73	1.62	0.589744	7.12039	0	0.78	0.31	-0.235897	3.00764	0	0.4	0.236641
1	270	1.67	1.86	1.31	0.897849	4.06912	1.44	2.64	1.57	0.545455	5.96851	-0.23	0.78	0.26	-0.352395	1.89939	-0.137725	0.419355	0.198473
1	270	1.42	1.75	1.27	0.811429	3.15595	1.37	2.41	1.31	0.568465	4.32523	-0.05	0.66	0.04	-0.242964	1.16928	-0.0352113	0.377143	0.0314961
1	270	1.58	1.62	1.15	0.975309	2.94354	1.47	2.41	1.59	0.609959	5.63289	-0.11	0.79	0.44	-0.36535	2.68935	-0.0696203	0.487654	0.382609
1	270	1.47	1.72	1.25	0.854651	3.1605	1.75	2.76	1.64	0.634058	7.9212	0.28	1.04	0.39	-0.220593	4.7607	0.190476	0.604651	0.312
1	270	1.34	1.85	1.28	0.724324	3.17312	1.85	2.19	1.42	0.844749	5.75313	0.51	0.34	0.14	0.120425	2.58001	0.380597	0.183784	0.109375
1	270	1.5	1.74	1.25	0.862069	3.2625	1.5	2.72	1.45	0.551471	5.916	0	0.98	0.2	-0.310598	2.6535	0	0.563218	0.16
1	270	1.36	1.67	1.28	0.814371	2.90714	1.27	2.45	1.31	0.518367	4.07607	-0.09	0.78	0.03	-0.296004	1.16893	-0.0661765	0.467066	0.0234375
1	270	1.42	1.72	1.24	0.825581	3.02858	1.46	2.78	1.63	0.52518	6.61584	0.04	1.06	0.39	-0.300402	3.58727	0.028169	0.616279	0.314516
3	270	1.23	1.75	1.34	0.702857	2.88435	1.72	2.65	1.75	0.649057	7.9765	0.49	0.9	0.41	-0.0538005	5.09215	0.398374	0.514286	0.30597
3	270	1.41	1.86	1.34	0.758065	3.51428	1.88	2.6	2.07	0.723077	10.1182	0.47	0.74	0.73	-0.0349876	6.60388	0.333333	0.397849	0.544776
3	270	1.58	1.65	1.28	0.957576	3.33696	2.04	3.01	1.77	0.677741	10.8685	0.46	1.36	0.49	-0.279835	7.53155	0.291139	0.824242	0.382812
3	270	1.23	1.8	1.31	0.683333	2.90034	1.83	2.7	1.7	0.677778	8.3997	0.6	0.9	0.39	-0.00555556	5.49936	0.487805	0.5	0.29771
3	270	1.61	1.87	1.24	0.860963	3.73327	1.74	3	1.94	0.58	10.1268	0.13	1.13	0.7	-0.280963	6.39353	0.0807453	0.604278	0.564516
3	270	1.37	1.61	1.23	0.850932	2.71301	1.7	2.56	2.06	0.664062	8.96512	0.33	0.95	0.83	-0.186869	6.25211	0.240876	0.590062	0.674797
3	270	1.44	1.71	1.34	0.842105	3.29962	1.89	2.45	1.79	0.771429	8.2886	0.45	0.74	0.45	-0.0706767	4.98898	0.3125	0.432749	0.335821
3	270	1.42	1.74	1.39	0.816092	3.43441	1.77	2.7	1.77	0.655556	8.45883	0.35	0.96	0.38	-0.160536	5.02442	0.246479	0.551724	0.273381
3	270	1.56	1.82	1.32	0.857143	3.74774	1.76	2.86	1.72	0.615385	8.65779	0.2	1.04	0.4	-0.241758	4.91005	0.128205	0.571429	0.30303
3	270	1.36	1.77	1.3	0.768362	3.12936	1.75	3.03	1.81	0.577558	9.59752	0.39	1.26	0.51	-0.190804	6.46816	0.286765	0.711864	0.392308
3	270	1.55	1.73	1.29	0.895954	3.45914	1.7	3.2	1.58	0.53125	8.5952	0.15	1.47	0.29	-0.364704	5.13607	0.0967742	0.849711	0.224806
3	270	1.73	1.86	1.39	0.930108	4.47274	1.89	2.92	1.91	0.64726	10.5409	0.16	1.06	0.52	-0.282847	6.06817	0.0924855	0.569892	0.374101
3	270	1.41	1.68	1.15	0.839286	2.72412	1.78	3.21	2.07	0.554517	11.8276	0.37	1.53	0.92	-0.284769	9.10345	0.262411	0.910714	0.8
3	270	1.55	1.77	1.37	0.875706	3.7586	1.75	2.85	1.75	0.614035	8.72813	0.2	1.08	0.38	-0.261671	4.96953	0.129032	0.610169	0.277372
3	270	1.35	1.71	1.29	0.789474	2.97797	1.7	2.83	1.98	0.600707	9.52578	0.35	1.12	0.69	-0.188767	6.54781	0.259259	0.654971	0.534884
3	270	1.19	1.68	1.2	0.708333	2.39904	1.95	3.25	1.9	0.6	12.0412	0.76	1.57	0.7	-0.108333	9.64221	0.638655	0.934524	0.583333
3	270	1.54	1.66	1.32	0.927711	3.37445	2.09	2.66	1.74	0.785714	9.67336	0.55	1	0.42	-0.141997	6.29891	0.357143	0.60241	0.318182
3	270	1.42	1.62	1.3	0.876543	2.99052	1.59	3.85	2.1	0.412987	12.8552	0.17	2.23	0.8	-0.463556	9.86463	0.119718	1.37654	0.615385
3	270	1.46	1.67	1.32	0.874251	3.21842	2.03	3.2	2.26	0.634375	14.681	0.57	1.53	0.94	-0.239876	11.4625	0.390411	0.916168	0.712121
3	270	1.52	1.82	1.34	0.835165	3.70698	1.79	3.73	1.6	0.479893	10.6827	0.27	1.91	0.26	-0.355272	6.97574	0.177632	1.04945	0.19403
5	270	1.32	1.73	1.28	0.763006	2.92301	1.25	2.14	1.3	0.584112	3.4775	-0.07	0.41	0.02	-0.178894	0.554492	-0.0530303	0.236994	0.015625
5	270	1.73	1.87	1.31	0.925134	4.23798	1.23	1.88	1.19	0.654255	2.75176	-0.5	0.01	-0.12	-0.270878	-1.48623	-0.289017	0.00534759	-0.0916031
5	270	1.51	1.81	1.32	0.834254	3.60769	1.55	2.13	1.77	0.7277	5.84366	0.04	0.32	0.45	-0.106555	2.23596	0.0264901	0.176796	0.340909
5	270	1.28	1.77	1.3	0.723164	2.94528	2.13	2.51	1.93	0.848606	10.3184	0.85	0.74	0.63	0.125442	7.37308	0.664062	0.418079	0.484615
5	270	1.42	1.74	1.46	0.816092	3.60737	1.24	1.99	1.45	0.623116	3.57802	-0.18	0.25	-0.01	-0.192976	-0.029348	-0.126761	0.143678	-0.00684932
5	270	1.55	1.81	1.32	0.856354	3.70326	1.29	2.04	1.27	0.632353	3.34213	-0.26	0.23	-0.05	-0.224001	-0.361128	-0.167742	0.127072	-0.0378788
5	270	1.38	1.64	1.33	0.841463	3.01006	1.36	2.2	1.22	0.618182	3.65024	-0.02	0.56	-0.11	-0.223282	0.640184	-0.0144928	0.341463	-0.0827068
5	270	1.4	1.76	1.24	0.795455	3.05536	1.3	2.17	1.28	0.599078	3.61088	-0.1	0.41	0.04	-0.196376	0.55552	-0.0714286	0.232955	0.0322581
5	270	1.56	1.82	1.33	0.857143	3.77614	1.24	2.03	1.21	0.610837	3.04581	-0.32	0.21	-0.12	-0.246305	-0.730324	-0.205128	0.115385	-0.0902256
5	270	1.33	1.95	1.42	0.682051	3.68277	1.27	2.02	1.34	0.628713	3.43764	-0.06	0.07	-0.08	-0.0533384	-0.245134	-0.0451128	0.0358974	-0.056338
5	270	1.29	1.63	1.37	0.791411	2.8807	1.24	2.45	1.4	0.506122	4.2532	-0.05	0.82	0.03	-0.285289	1.3725	-0.0387597	0.503067	0.0218978
5	270	1.25	1.78	1.33	0.702247	2.95925	1.25	2.13	1.29	0.586854	3.43462	0	0.35	-0.04	-0.115393	0.475375	0	0.196629	-0.0300752
5	270	1.51	1.72	1.4	0.877907	3.63608	1.45	1.89	1.53	0.767196	4.19297	-0.06	0.17	0.13	-0.110711	0.556885	-0.0397351	0.0988372	0.0928571
5	270	1.01	1.68	1.3	0.60119	2.20584	1.35	2.03	1.58	0.665025	4.32999	0.34	0.35	0.28	0.0638342	2.12415	0.336634	0.208333	0.215385
5	270	1.56	1.77	1.29	0.881356	3.56195	1.56	2	1.33	0.78	4.1496	0	0.23	0.04	-0.101356	0.587652	0	0.129944	0.0310078
5	270	1.52	1.89	1.31	0.804233	3.76337	1.25	2.24	1.29	0.558036	3.612	-0.27	0.35	-0.02	-0.246197	-0.151368	-0.177632	0.185185	-0.0152672
5	270	1.47	1.7	1.46	0.864706	3.64854	1.48	2.12	1.35	0.698113	4.23576	0.01	0.42	-0.11	-0.166593	0.58722	0.00680272	0.247059	-0.0753425
5	270	1.47	1.78	1.42	0.825843	3.71557	1.4	2.38	1.34	0.588235	4.46488	-0.07	0.6	-0.08	-0.237607	0.749308	-0.047619	0.337079	-0.056338
5	270	1.39	1.73	1.44	0.803468	3.46277	1.13	2.04	1.25	0.553922	2.8815	-0.26	0.31	-0.19	-0.249547	-0.581268	-0.18705	0.179191	-0.131944
5	270	1.22	1.73	1.37	0.705202	2.89152	1.24	2.3	1.36	0.53913	3.87872	0.02	0.57	-0.01	-0.166072	0.987198	0.0163934	0.32948	-0.00729927
1	280	1.61	1.8	1.17	0.894444	3.39066	1.81	2.54	1.77	0.712598	8.1374	0.2	0.74	0.6	-0.181846	4.74674	0.124224	0.411111	0.512821
1	280	1.61	1.9	1.26	0.847368	3.85434	1.79	2.4	1.55	0.745833	6.6588	0.18	0.5	0.29	-0.101535	2.80446	0.111801	0.263158	0.230159
1	280	1.63	1.87	1.46	0.871658	4.45023	1.58	2.4	1.32	0.658333	5.00544	-0.05	0.53	-0.14	-0.213324	0.555214	-0.0306748	0.283422	-0.0958904
1	280	1.46	1.86	1.3	0.784946	3.53028	1.4	2.37	1.35	0.590717	4.4793	-0.06	0.51	0.05	-0.194229	0.94902	-0.0410959	0.274194	0.0384615
1	280	1.44	1.77	1.36	0.813559	3.46637	1.62	2.72	1.82	0.595588	8.01965	0.18	0.95	0.46	-0.217971	4.55328	0.125	0.536723	0.338235
1	280	1.28	1.78	1.47	0.719101	3.34925	1.51	2.11	1.63	0.71564	5.19334	0.23	0.33	0.16	-0.00346131	1.84409	0.179687	0.185393	0.108844
1	280	1.3	1.83	1.45	0.710383	3.44955	1.51	2.43	1.35	0.621399	4.95356	0.21	0.6	-0.1	-0.0889833	1.50401	0.161538	0.327869	-0.0689655
1	280	1.58	1.75	1.33	0.902857	3.67745	1.75	2.69	1.78	0.650558	8.37935	0.17	0.94	0.45	-0.2523	4.7019	0.107595	0.537143	0.338346
1	280	1.39	1.83	1.39	0.759563	3.53574	1.6	2.37	1.46	0.675105	5.53632	0.21	0.54	0.07	-0.0844574	2.00058	0.151079	0.295082	0.0503597
1	280	1.42	1.69	1.27	0.840237	3.04775	1.96	2.97	2.22	0.659933	12.9231	0.54	1.28	0.95	-0.180304	9.87532	0.380282	0.757396	0.748031
1	280	1.46	1.61	1.33	0.906832	3.1263	1.42	2.72	1.26	0.522059	4.86662	-0.04	1.11	-0.07	-0.384773	1.74033	-0.0273973	0.689441	-0.0526316
1	280	1.45	1.8	1.28	0.805556	3.3408	1.53	2.42	1.54	0.632231	5.702	0.08	0.62	0.26	-0.173324	2.3612	0.0551724	0.344444	0.203125
1	280	1.42	1.76	1.31	0.806818	3.27395	1.32	3.04	1.42	0.434211	5.69818	-0.1	1.28	0.11	-0.372608	2.42422	-0.0704225	0.727273	0.0839695
1	280	1.7	1.76	1.21	0.965909	3.62032	1.57	2.27	1.65	0.69163	5.88044	-0.13	0.51	0.44	-0.274279	2.26012	-0.0764706	0.289773	0.363636
1	280	1.26	1.73	1.2	0.728324	2.61576	1.62	2.44	1.53	0.663934	6.04778	0.36	0.71	0.33	-0.0643893	3.43202	0.285714	0.410405	0.275
1	280	1.37	1.82	1.35	0.752747	3.36609	2.02	2.73	1.88	0.739927	10.3674	0.65	0.91	0.53	-0.0128205	7.00136	0.474453	0.5	0.392593
1	280	1.42	1.73	1.41	0.820809	3.46381	1.57	2.38	1.39	0.659664	5.19387	0.15	0.65	-0.02	-0.161145	1.73007	0.105634	0.375723	-0.0141844
1	280	1.17	1.82	1.25	0.642857	2.66175	1.52	2.92	1.66	0.520548	7.36774	0.35	1.1	0.41	-0.122309	4.70599	0.299145	0.604396	0.328
1	280	1.51	1.79	1.46	0.843575	3.94623	2.41	2.72	2.43	0.886029	15.9291	0.9	0.93	0.97	0.042454	11.9829	0.596026	0.519553	0.664384
1	280	1.5	1.8	1.41	0.833333	3.807	1.58	2.78	1.78	0.568345	7.81847	0.08	0.98	0.37	-0.264988	4.01147	0.0533333	0.544444	0.262411
3	280	1.49	1.74	1.18	0.856322	3.05927	1.66	2.43	1.45	0.683128	5.84901	0.17	0.69	0.27	-0.173194	2.78974	0.114094	0.396552	0.228814
3	280	1.57	1.77	1.31	0.887006	3.64036	1.48	2.48	1.56	0.596774	5.72582	-0.09	0.71	0.25	-0.290231	2.08547	-0.0573248	0.40113	0.19084
3	280	1.72	1.81	1.39	0.950276	4.32735	1.32	2.2	1.39	0.6	4.03656	-0.4	0.39	0	-0.350276	-0.290788	-0.232558	0.21547	0
3	280	1.58	1.75	1.33	0.902857	3.67745	1.38	1.9	1.34	0.726316	3.51348	-0.2	0.15	0.01	-0.176541	-0.16397	-0.126582	0.0857143	0.0075188
3	280	1.32	1.63	1.2	0.809816	2.58192	1.56	2.6	1.57	0.6	6.36792	0.24	0.97	0.37	-0.209816	3.786	0.181818	0.595092	0.308333
3	280	1.52	1.79	1.14	0.849162	3.10171	1.46	2.31	1.54	0.632035	5.1938	-0.06	0.52	0.4	-0.217127	2.09209	-0.0394737	0.290503	0.350877
3	280	1.32	1.72	1.22	0.767442	2.76989	1.43	2.39	1.52	0.598326	5.1949	0.11	0.67	0.3	-0.169116	2.42502	0.0833333	0.389535	0.245902
3	280	1.39	1.83	1.49	0.759563	3.79011	1.43	2.31	1.39	0.619048	4.59159	0.04	0.48	-0.1	-0.140515	0.801474	0.028777	0.262295	-0.0671141
3	280	1.42	1.76	1.36	0.806818	3.39891	1.35	2.39	1.45	0.564854	4.67843	-0.07	0.63	0.09	-0.241965	1.27951	-0.0492958	0.357955	0.0661765
3	280	1.51	1.73	1.29	0.872832	3.36987	1.5	2.02	1.2	0.742574	3.636	-0.01	0.29	-0.09	-0.130258	0.266133	-0.00662252	0.16763	-0.0697674
3	280	1.45	1.78	1.43	0.814607	3.69083	1.38	2.26	1.44	0.610619	4.49107	-0.07	0.48	0.01	-0.203987	0.800242	-0.0482759	0.269663	0.00699301
3	280	1.4	1.77	1.35	0.79096	3.3453	1.87	1.95	1.98	0.958974	7.22007	0.47	0.18	0.63	0.168014	3.87477	0.335714	0.101695	0.466667
3	280	1.58	1.7	1.09	0.929412	2.92774	1.23	2.75	1.6	0.447273	5.412	-0.35	1.05	0.51	-0.482139	2.48426	-0.221519	0.617647	0.46789
3	280	1.63	1.7	1.35	0.958824	3.74085	1.78	2.15	1.56	0.827907	5.97012	0.15	0.45	0.21	-0.130917	2.22927	0.0920245	0.264706	0.155556
3	280	1.65	1.82	1.27	0.906593	3.81381	1.38	2.48	1.47	0.556452	5.03093	-0.27	0.66	0.2	-0.350142	1.21712	-0.163636	0.362637	0.15748
3	280	1.43	1.71	1.32	0.836257	3.2278	1.79	2	1.28	0.895	4.5824	0.36	0.29	-0.04	0.0587427	1.3546	0.251748	0.169591	-0.030303
3	280	1.38	1.79	1.3	0.77095	3.21126	1.43	2.39	1.72	0.598326	5.87844	0.05	0.6	0.42	-0.172623	2.66718	0.0362319	0.335196	0.323077
3	280	1.54	1.76	1.45	0.875	3.93008	1.18	2.28	1.44	0.517544	3.87418	-0.36	0.52	-0.01	-0.357456	-0.055904	-0.233766	0.295455	-0.00689655
3	280	1.5	1.93	1.38	0.777202	3.9951	1.76	2.55	1.7	0.690196	7.6296	0.26	0.62	0.32	-0.087006	3.6345	0.173333	0.321244	0.231884
3	280	1.75	1.78	1.45	0.983146	4.51675	1.22	2.53	1.23	0.482213	3.79652	-0.53	0.75	-0.22	-0.500933	-0.720232	-0.302857	0.421348	-0.151724
5	280	1.57	1.68	1.44	0.934524	3.79814	1.32	1.95	1.36	0.676923	3.50064	-0.25	0.27	-0.08	-0.257601	-0.297504	-0.159236	0.160714	-0.0555556
5	280	1.47	1.72	1.48	0.854651	3.74203	1.16	2.13	1.33	0.544601	3.28616	-0.31	0.41	-0.15	-0.31005	-0.455868	-0.210884	0.238372	-0.101351
5	280	1.41	1.79	1.42	0.787709	3.58394	1.39	2.1	1.52	0.661905	4.43688	-0.02	0.31	0.1	-0.125805	0.852942	-0.0141844	0.173184	0.0704225
5	280	1.36	1.85	1.46	0.735135	3.67336	1.59	2.11	1.28	0.753555	4.29427	0.23	0.26	-0.18	0.0184194	0.620912	0.169118	0.140541	-0.123288
5	280	1.53	1.76	1.42	0.869318	3.82378	1.39	2.17	1.38	0.640553	4.16249	-0.14	0.41	-0.04	-0.228765	0.338718	-0.0915033	0.232955	-0.028169
5	280	1.53	1.8	1.28	0.85	3.52512	1.52	2.2	1.29	0.690909	4.31376	-0.01	0.4	0.01	-0.159091	0.78864	-0.00653595	0.222222	0.0078125
5	280	1.3	1.67	1.31	0.778443	2.84401	1.57	2.13	1.32	0.737089	4.41421	0.27	0.46	0.01	-0.0413539	1.5702	0.207692	0.275449	0.00763359
5	280	1.44	1.85	1.44	0.778378	3.83616	1.38	2.03	1.46	0.679803	4.09004	-0.06	0.18	0.02	-0.0985754	0.253884	-0.0416667	0.0972973	0.0138889
5	280	1.57	1.82	1.4	0.862637	4.00036	1.44	2.16	1.4	0.666667	4.35456	-0.13	0.34	0	-0.195971	0.3542	-0.0828025	0.186813	0
5	280	1.51	1.79	1.2	0.843575	3.24348	1.48	2.1	1.46	0.704762	4.53768	-0.03	0.31	0.26	-0.138814	1.2942	-0.0198675	0.173184	0.216667
5	280	1.5	1.82	1.46	0.824176	3.9858	1.4	1.87	1.24	0.748663	3.24632	-0.1	0.05	-0.22	-0.0755127	-0.73948	-0.0666667	0.0274725	-0.150685
5	280	1.39	1.85	1.38	0.751351	3.54867	1.31	2.59	1.54	0.505792	5.22507	-0.08	0.74	0.16	-0.24556	1.6764	-0.057554	0.4	0.115942
5	280	1.71	1.79	1.23	0.955307	3.76491	1.43	2.01	1.35	0.711443	3.8803	-0.28	0.22	0.12	-0.243864	0.115398	-0.163743	0.122905	0.097561
5	280	1.26	1.77	1.4	0.711864	3.12228	1.16	2.28	1.27	0.508772	3.3589	-0.1	0.51	-0.13	-0.203092	0.236616	-0.0793651	0.288136	-0.0928571
5	280	1.26	1.8	1.41	0.7	3.19788	1.58	2.18	1.29	0.724771	4.44328	0.32	0.38	-0.12	0.0247706	1.2454	0.253968	0.211111	-0.0851064
5	280	1.51	1.8	1.43	0.838889	3.88674	1.57	2.06	1.32	0.762136	4.26914	0.06	0.26	-0.11	-0.076753	0.382404	0.0397351	0.144444	-0.0769231
5	280	1.7	1.75	1.47	0.971429	4.37325	1.2	2.16	1.36	0.555556	3.52512	-0.5	0.41	-0.11	-0.415873	-0.84813	-0.294118	0.234286	-0.0748299
5	280	1.34	1.69	1.1	0.792899	2.49106	1.27	2.11	1.39	0.601896	3.72478	-0.07	0.42	0.29	-0.191004	1.23372	-0.0522388	0.248521	0.263636
5	280	1.34	1.76	1.3	0.761364	3.06592	1.43	2.17	1.61	0.658986	4.99599	0.09	0.41	0.31	-0.102377	1.93007	0.0671642	0.232955	0.238462
5	280	1.51	1.78	1.28	0.848315	3.44038	1.37	2.14	1.28	0.640187	3.7527	-0.14	0.36	0	-0.208128	0.31232	-0.0927152	0.202247	0
1	290	1.39	1.78	1.27	0.780899	3.14223	1.69	2.88	1.69	0.586806	8.22557	0.3	1.1	0.42	-0.194093	5.08333	0.215827	0.617978	0.330709
1	290	1.39	1.72	1.31	0.80814	3.13195	1.56	3.32	2.29	0.46988	11.8604	0.17	1.6	0.98	-0.33826	8.72842	0.122302	0.930233	0.748092
1	290	1.45	1.78	1.35	0.814607	3.48435	1.29	2.56	1.6	0.503906	5.28384	-0.16	0.78	0.25	-0.3107	1.79949	-0.110345	0.438202	0.185185
1	290	1.7	1.72	1.38	0.988372	4.03512	1.53	2.36	1.57	0.648305	5.66896	-0.17	0.64	0.19	-0.340067	1.63384	-0.1	0.372093	0.137681
1	290	1.35	1.69	1.27	0.798817	2.8975	2.44	2.35	1.85	1.0383	10.6079	1.09	0.66	0.58	0.239481	7.7104	0.807407	0.390533	0.456693
1	290	1.53	1.74	1.38	0.87931	3.67384	1.3	2.38	1.62	0.546218	5.01228	-0.23	0.64	0.24	-0.333092	1.33844	-0.150327	0.367816	0.173913
1	290	1.5	1.88	1.39	0.797872	3.9198	1.42	2.66	1.52	0.533835	5.74134	-0.08	0.78	0.13	-0.264038	1.82154	-0.0533333	0.414894	0.0935252
1	290	1.3	1.78	1.35	0.730337	3.1239	1.84	2.53	1.99	0.727273	9.26385	0.54	0.75	0.64	-0.00306435	6.13995	0.415385	0.421348	0.474074
1	290	1.33	1.83	1.34	0.726776	3.26143	1.7	2.67	1.45	0.636704	6.58155	0.37	0.84	0.11	-0.0900718	3.32012	0.278195	0.459016	0.0820896
1	290	1.43	1.69	1.21	0.846154	2.92421	1.88	2.56	1.88	0.734375	9.04806	0.45	0.87	0.67	-0.111779	6.12386	0.314685	0.514793	0.553719
1	290	1.19	1.69	1.39	0.704142	2.79543	1.37	2.39	1.33	0.573222	4.35482	0.18	0.7	-0.06	-0.13092	1.55939	0.151261	0.414201	-0.0431655
1	290	1.6	1.72	1.21	0.930233	3.32992	1.78	3.34	1.93	0.532934	11.4742	0.18	1.62	0.72	-0.397298	8.14432	0.1125	0.94186	0.595041
1	290	1.69	1.73	1.42	0.976879	4.15165	1.72	2.63	1.64	0.653992	7.4187	0.03	0.9	0.22	-0.322886	3.26705	0.0177515	0.520231	0.15493
1	290	1.36	1.69	1.18	0.804734	2.71211	1.89	2.39	1.5	0.790795	6.77565	0.53	0.7	0.32	-0.0139387	4.06354	0.389706	0.414201	0.271186
1	290	1.68	1.86	1.3	0.903226	4.06224	1.8	2.47	1.69	0.728745	7.51374	0.12	0.61	0.39	-0.174481	3.4515	0.0714286	0.327957	0.3
1	290	1.47	1.75	1.37	0.84	3.52433	2.07	2.9	2.09	0.713793	12.5463	0.6	1.15	0.72	-0.126207	9.02194	0.408163	0.657143	0.525547
1	290	1.62	1.66	1.26	0.975904	3.38839	2.17	2.68	1.96	0.809701	11.3986	0.55	1.02	0.7	-0.166202	8.01018	0.339506	0.614458	0.555556
1	290	1.45	1.61	1.71	0.900621	3.992	1.68	2.47	1.53	0.680162	6.34889	0.23	0.86	-0.18	-0.220459	2.35689	0.158621	0.534161	-0.105263
1	290	1.25	1.7	1.29	0.735294	2.74125	1.65	2.64	1.59	0.625	6.92604	0.4	0.94	0.3	-0.110294	4.18479	0.32	0.552941	0.232558
1	290	1.56	1.75	1.33	0.891429	3.6309	1.62	2.99	1.61	0.541806	7.79852	0.06	1.24	0.28	-0.349623	4.16762	0.0384615	0.708571	0.210526
3	290	1.32	1.74	1.3	0.758621	2.98584	1.34	1.8	1.27	0.744444	3.06324	0.02	0.06	-0.03	-0.0141762	0.0774	0.0151515	0.0344828	-0.0230769
3	290	1.21	1.83	1.33	0.661202	2.94502	1.41	2.13	1.53	0.661972	4.59505	0.2	0.3	0.2	0.000769645	1.65003	0.165289	0.163934	0.150376
3	290	1.47	1.82	1.42	0.807692	3.79907	1.64	2.29	1.4	0.716157	5.25784	0.17	0.47	-0.02	-0.0915351	1.45877	0.115646	0.258242	-0.0140845
3	290	1.49	1.83	1.34	0.814208	3.65378	1.43	2.22	1.51	0.644144	4.79365	-0.06	0.39	0.17	-0.170064	1.13987	-0.0402685	0.213115	0.126866
3	290	1.57	1.74	1.38	0.902299	3.76988	1.57	1.92	1.3	0.817708	3.91872	0	0.18	-0.08	-0.0845905	0.148836	0	0.103448	-0.057971
3	290	1.33	1.84	1.41	0.722826	3.45055	1.77	2.14	1.32	0.827103	4.9999	0.44	0.3	-0.09	0.104277	1.54934	0.330827	0.163043	-0.0638298
3	290	1.48	1.6	1.21	0.925	2.86528	1.54	2.37	1.3	0.649789	4.74474	0.06	0.77	0.09	-0.275211	1.87946	0.0405405	0.48125	0.0743802
3	290	1.34	1.79	1.43	0.748603	3.43	1.29	3.07	1.33	0.420195	5.2672	-0.05	1.28	-0.1	-0.328408	1.8372	-0.0373134	0.715084	-0.0699301
3	290	1.42	1.78	1.39	0.797753	3.51336	1.32	2.42	1.38	0.545455	4.40827	-0.1	0.64	-0.01	-0.252298	0.894908	-0.0704225	0.359551	-0.00719424
3	290	1.5	1.77	1.25	0.847458	3.31875	1.29	2.12	1.3	0.608491	3.55524	-0.21	0.35	0.05	-0.238967	0.23649	-0.14	0.19774	0.04
3	290	1.45	1.85	1.3	0.783784	3.48725	1.42	2.17	1.45	0.654378	4.46803	-0.03	0.32	0.15	-0.129406	0.98078	-0.0206897	0.172973	0.115385
3	290	1.56	1.82	1.3	0.857143	3.69096	1.32	2.38	1.29	0.554622	4.05266	-0.24	0.56	-0.01	-0.302521	0.361704	-0.153846	0.307692	-0.00769231
3	290	1.35	1.75	1.25	0.771429	2.95313	1.63	2.53	1.48	0.644269	6.10337	0.28	0.78	0.23	-0.12716	3.15025	0.207407	0.445714	0.184
3	290	1.36	1.76	1.33	0.772727	3.18349	1.62	2.17	1.39	0.746544	4.88641	0.26	0.41	0.06	-0.0261835	1.70292	0.191176	0.232955	0.0451128
3	290	1.14	1.7	1.21	0.670588	2.34498	1.57	2.29	1.49	0.68559	5.357	0.43	0.59	0.28	0.0150013	3.01202	0.377193	0.347059	0.231405
3	290	1.21	1.75	1.46	0.691429	3.09155	1.41	2.39	1.4	0.589958	4.71786	0.2	0.64	-0.06	-0.10147	1.62631	0.165289	0.365714	-0.0410959
3	290	1.33	1.83	1.43	0.726776	3.48048	1.61	2.51	1.6	0.641434	6.46576	0.28	0.68	0.17	-0.0853417	2.98528	0.210526	0.371585	0.118881
3	290	1.2	1.83	1.28	0.655738	2.81088	1.74	2.54	1.73	0.685039	7.64591	0.54	0.71	0.45	0.0293017	4.83503	0.45	0.387978	0.351562
3	290	1.44	1.82	1.41	0.791209	3.69533	1.14	2.5	1.59	0.456	4.5315	-0.3	0.68	0.18	-0.335209	0.836172	-0.208333	0.373626	0.12766
3	290	1.62	1.73	1.21	0.936416	3.39115	1.22	3.24	1.47	0.376543	5.81062	-0.4	1.51	0.26	-0.559873	2.41947	-0.246914	0.872832	0.214876
5	290	1.47	1.72	1.3	0.854651	3.28692	1.51	1.58	1.34	0.955696	3.19697	0.04	-0.14	0.04	0.101045	-0.089948	0.0272109	-0.0813953	0.0307692
5	290	1.25	1.73	1.24	0.722543	2.6815	1.52	2.03	1.38	0.748768	4.25813	0.27	0.3	0.14	0.0262251	1.57663	0.216	0.17341	0.112903
5	290	1.51	1.66	1.19	0.909639	2.98285	1.67	2.27	1.69	0.735683	6.40662	0.16	0.61	0.5	-0.173956	3.42377	0.10596	0.36747	0.420168
5	290	1.63	1.84	1.45	0.88587	4.34884	1.5	2.33	1.39	0.643777	4.85805	-0.13	0.49	-0.06	-0.242093	0.50921	-0.0797546	0.266304	-0.0413793
5	290	1.69	1.81	1.44	0.933702	4.40482	1.64	2.46	1.79	0.666667	7.22158	-0.05	0.65	0.35	-0.267035	2.81676	-0.0295858	0.359116	0.243056
5	290	1.33	1.88	1.33	0.707447	3.32553	1.31	2.13	1.31	0.615023	3.65529	-0.02	0.25	-0.02	-0.0924233	0.329761	-0.0150376	0.132979	-0.0150376
5	290	1.45	1.8	1.26	0.805556	3.2886	1.42	2.56	1.53	0.554688	5.56186	-0.03	0.76	0.27	-0.250868	2.27326	-0.0206897	0.422222	0.214286
5	290	1.25	1.81	1.36	0.690608	3.077	1.35	2.52	1.49	0.535714	5.06898	0.1	0.71	0.13	-0.154893	1.99198	0.08	0.392265	0.0955882
5	290	1.35	1.84	1.37	0.733696	3.40308	1.07	2.54	1.29	0.42126	3.50596	-0.28	0.7	-0.08	-0.312436	0.102882	-0.207407	0.380435	-0.0583942
5	290	1.25	1.71	1.35	0.730994	2.88563	1.32	2.09	1.34	0.631579	3.69679	0.07	0.38	-0.01	-0.0994152	0.811167	0.056	0.222222	-0.00740741
5	290	1.45	1.83	1.29	0.79235	3.42302	1.52	2.66	1.55	0.571429	6.26696	0.07	0.83	0.26	-0.220921	2.84395	0.0482759	0.453552	0.20155
5	290	1.34	1.68	1.13	0.797619	2.54386	1.4	2.19	1.34	0.639269	4.10844	0.06	0.51	0.21	-0.15835	1.56458	0.0447761	0.303571	0.185841
5	290	1.18	1.76	1.42	0.670455	2.94906	1.53	2.23	1.39	0.686099	4.74254	0.35	0.47	-0.03	0.0156441	1.79349	0.29661	0.267045	-0.0211268
5	290	1.42	1.78	1.35	0.797753	3.41226	1.41	2.16	1.29	0.652778	3.92882	-0.01	0.38	-0.06	-0.144975	0.516564	-0.00704225	0.213483	-0.0444444
5	290	1.3	1.79	1.42	0.726257	3.30434	1.51	2.16	1.29	0.699074	4.20746	0.21	0.37	-0.13	-0.0271829	0.903124	0.161538	0.206704	-0.0915493
5	290	1.55	1.76	1.5	0.880682	4.092	1.26	1.8	1.27	0.7	2.88036	-0.29	0.04	-0.23	-0.180682	-1.21164	-0.187097	0.0227273	-0.153333
5	290	1.54	1.88	1.41	0.819149	4.08223	1.95	2.71	1.92	0.719557	10.1462	0.41	0.83	0.51	-0.0995917	6.06401	0.266234	0.441489	0.361702
5	290	1.57	1.76	1.44	0.892045	3.97901	1.5	2.19	1.77	0.684932	5.81445	-0.07	0.43	0.33	-0.207114	1.83544	-0.044586	0.244318	0.229167
5	290	1.23	1.8	1.38	0.683333	3.05532	1.29	2.33	1.54	0.553648	4.62878	0.06	0.53	0.16	-0.129685	1.57346	0.0487805	0.294444	0.115942
5	290	1.53	1.87	1.42	0.818182	4.06276	1.38	2.96	1.5	0.466216	6.1272	-0.15	1.09	0.08	-0.351966	2.06444	-0.0980392	0.582888	0.056338
1	300	1.5	2.09	1.62	0.717703	5.0787	1.63	2.63	1.6	0.619772	6.85904	0.13	0.54	-0.02	-0.0979315	1.78034	0.0866667	0.258373	-0.0123457
1	300	1.6	2.13	1.48	0.751174	5.04384	1.48	2.29	1.48	0.646288	5.01602	-0.12	0.16	0	-0.104885	-0.027824	-0.075	0.0751174	0
1	300	1.53	1.92	1.33	0.796875	3.90701	1.68	2.68	1.9	0.626866	8.55456	0.15	0.76	0.57	-0.170009	4.64755	0.0980392	0.395833	0.428571
1	300	1.6	1.85	1.3	0.864865	3.848	1.38	2.64	1.4	0.522727	5.10048	-0.22	0.79	0.1	-0.342138	1.25248	-0.1375	0.427027	0.0769231
1	300	1.83	2.09	1.48	0.875598	5.66056	1.55	2.81	1.71	0.551601	7.44791	-0.28	0.72	0.23	-0.323997	1.78735	-0.153005	0.344498	0.155405
1	300	1.57	2.03	1.65	0.773399	5.25871	1.46	1.99	1.36	0.733668	3.95134	-0.11	-0.04	-0.29	-0.0397307	-1.30737	-0.0700637	-0.0197044	-0.175758
1	300	1.49	2.08	1.51	0.716346	4.67979	1.75	2.13	1.52	0.821596	5.6658	0.26	0.05	0.01	0.10525	0.986008	0.174497	0.0240385	0.00662252
1	300	1.84	2.06	1.5	0.893204	5.6856	1.81	2.85	1.69	0.635088	8.71786	-0.03	0.79	0.19	-0.258116	3.03226	-0.0163043	0.383495	0.126667
1	300	1.86	2.01	1.35	0.925373	5.04711	1.54	2.44	1.61	0.631148	6.04974	-0.32	0.43	0.26	-0.294226	1.00263	-0.172043	0.21393	0.192593
1	300	1.74	1.95	1.39	0.892308	4.71627	1.78	2.46	1.67	0.723577	7.3126	0.04	0.51	0.28	-0.16873	2.59633	0.0229885	0.261538	0.201439
1	300	1.83	2.14	1.7	0.85514	6.65754	1.56	2.07	1.27	0.753623	4.10108	-0.27	-0.07	-0.43	-0.101517	-2.55646	-0.147541	-0.0327103	-0.252941
1	300	1.57	2.02	1.49	0.777228	4.72539	1.57	2.23	1.29	0.704036	4.51642	0	0.21	-0.2	-0.0731918	-0.208967	0	0.10396	-0.134228
1	300	1.68	2.13	1.64	0.788732	5.86858	1.12	2.9	1.35	0.386207	4.3848	-0.56	0.77	-0.29	-0.402525	-1.48378	-0.333333	0.361502	-0.176829
1	300	1.68	2.09	1.67	0.803828	5.8637	1.61	2.7	1.57	0.596296	6.82479	-0.07	0.61	-0.1	-0.207531	0.961086	-0.0416667	0.291866	-0.0598802
1	300	1.77	1.99	1.48	0.889447	5.213	1.75	3.01	2.18	0.581395	11.4832	-0.02	1.02	0.7	-0.308052	6.27015	-0.0112994	0.512563	0.472973
1	300	1.46	2.04	1.61	0.715686	4.79522	1.77	3.22	1.64	0.549689	9.34702	0.31	1.18	0.03	-0.165997	4.55179	0.212329	0.578431	0.0186335
1	300	1.43	1.84	1.42	0.777174	3.7363	1.91	2.52	1.94	0.757937	9.33761	0.48	0.68	0.52	-0.0192374	5.6013	0.335664	0.369565	0.366197
1	300	1.76	2.04	1.64	0.862745	5.88826	1.31	2.64	1.5	0.496212	5.1876	-0.45	0.6	-0.14	-0.366533	-0.700656	-0.255682	0.294118	-0.0853659
1	300	1.41	2.1	1.6	0.671429	4.7376	1.68	2.53	1.39	0.664032	5.90806	0.27	0.43	-0.21	-0.00739695	1.17046	0.191489	0.204762	-0.13125
1	300	1.42	2.01	1.47	0.706468	4.19567	1.33	2.97	1.77	0.447811	6.99168	-0.09	0.96	0.3	-0.258656	2.796	-0.0633803	0.477612	0.204082
3	300	1.31	1.88	1.25	0.696809	3.0785	1.61	2.57	1.66	0.626459	6.86858	0.3	0.69	0.41	-0.0703494	3.79008	0.229008	0.367021	0.328
3	300	1.56	1.86	1.27	0.83871	3.68503	1.41	2.46	1.44	0.573171	4.99478	-0.15	0.6	0.17	-0.265539	1.30975	-0.0961538	0.322581	0.133858
3	300	1.5	1.68	1.28	0.892857	3.2256	1.54	2.54	1.65	0.606299	6.45414	0.04	0.86	0.37	-0.286558	3.22854	0.0266667	0.511905	0.289062
3	300	1.35	1.8	1.37	0.75	3.3291	1.83	2.67	1.52	0.685393	7.42687	0.48	0.87	0.15	-0.0646067	4.09777	0.355556	0.483333	0.109489
3	300	1.56	1.79	1.32	0.871508	3.68597	1.47	2.2	1.57	0.668182	5.07738	-0.09	0.41	0.25	-0.203327	1.39141	-0.0576923	0.22905	0.189394
3	300	1.28	1.7	1.26	0.752941	2.74176	1.47	2.49	1.57	0.590361	5.74667	0.19	0.79	0.31	-0.16258	3.00491	0.148437	0.464706	0.246032
3	300	1.62	1.9	1.32	0.852632	4.06296	1.81	2.52	1.77	0.718254	8.07332	0.19	0.62	0.45	-0.134378	4.01036	0.117284	0.326316	0.340909
3	300	1.6	1.84	1.34	0.869565	3.94496	1.59	2.32	1.56	0.685345	5.75453	-0.01	0.48	0.22	-0.18422	1.80957	-0.00625	0.26087	0.164179
3	300	1.77	1.86	1.31	0.951613	4.31278	1.55	2.2	1.22	0.704545	4.1602	-0.22	0.34	-0.09	-0.247067	-0.152582	-0.124294	0.182796	-0.0687023
3	300	1.67	1.73	1.43	0.965318	4.13141	1.45	2.29	1.61	0.633188	5.346	-0.22	0.56	0.18	-0.33213	1.21459	-0.131737	0.323699	0.125874
3	300	1.33	1.82	1.35	0.730769	3.26781	1.59	2.85	1.66	0.557895	7.52229	0.26	1.03	0.31	-0.172874	4.25448	0.195489	0.565934	0.22963
3	300	1.32	1.74	1.36	0.758621	3.12365	1.56	2.39	1.57	0.65272	5.85359	0.24	0.65	0.21	-0.105901	2.72994	0.181818	0.373563	0.154412
3	300	1.69	1.82	1.43	0.928571	4.39839	1.57	2.59	1.62	0.606178	6.58741	-0.12	0.77	0.19	-0.322394	2.18901	-0.0710059	0.423077	0.132867
3	300	1.42	1.67	1.48	0.850299	3.50967	1.45	2.12	1.3	0.683962	3.9962	0.03	0.45	-0.18	-0.166337	0.486528	0.0211268	0.269461	-0.121622
3	300	1.61	1.69	1.23	0.952663	3.34671	1.43	2.27	1.62	0.629956	5.25868	-0.18	0.58	0.39	-0.322707	1.91198	-0.111801	0.343195	0.317073
3	300	1.72	1.82	1.37	0.945055	4.28865	1.7	2.95	1.82	0.576271	9.1273	-0.02	1.13	0.45	-0.368784	4.83865	-0.0116279	0.620879	0.328467
3	300	1.45	1.83	1.27	0.79235	3.36995	1.67	2.46	1.56	0.678862	6.40879	0.22	0.63	0.29	-0.113488	3.03885	0.151724	0.344262	0.228346
3	300	1.53	1.81	1.33	0.845304	3.68317	1.66	2.73	2.01	0.608059	9.10892	0.13	0.92	0.68	-0.237245	5.42575	0.0849673	0.508287	0.511278
3	300	1.28	1.62	1.14	0.790123	2.3639	2.12	2.61	2.48	0.812261	13.7223	0.84	0.99	1.34	0.0221371	11.3584	0.65625	0.611111	1.17544
3	300	1.32	1.82	1.26	0.725275	3.02702	2.2	2.68	2.04	0.820896	12.0278	0.88	0.86	0.78	0.0956208	9.00082	0.666667	0.472527	0.619048
5	300	1.86	1.84	1.33	1.01087	4.55179	1.5	2.26	1.37	0.663717	4.6443	-0.36	0.42	0.04	-0.347153	0.092508	-0.193548	0.228261	0.0300752
5	300	1.61	1.82	1.33	0.884615	3.89717	1.52	2.21	1.44	0.687783	4.83725	-0.09	0.39	0.11	-0.196833	0.940082	-0.0559006	0.214286	0.0827068
5	300	1.58	1.62	1.37	0.975309	3.50665	1.77	2.67	1.73	0.662921	8.17581	0.19	1.05	0.36	-0.312387	4.66915	0.120253	0.648148	0.262774
5	300	1.6	1.89	1.49	0.846561	4.50576	1.6	1.99	1.37	0.80402	4.36208	0	0.1	-0.12	-0.0425407	-0.14368	0	0.0529101	-0.0805369
5	300	1.42	1.83	1.5	0.775956	3.8979	1.73	2.42	1.68	0.714876	7.03349	0.31	0.59	0.18	-0.0610803	3.13559	0.21831	0.322404	0.12
5	300	1.58	1.87	1.31	0.84492	3.87053	1.59	2.19	1.49	0.726027	5.18833	0.01	0.32	0.18	-0.118892	1.3178	0.00632911	0.171123	0.137405
5	300	1.54	1.87	1.45	0.823529	4.17571	1.58	2.79	1.86	0.566308	8.19925	0.04	0.92	0.41	-0.257221	4.02354	0.025974	0.491979	0.282759
5	300	1.53	1.79	1.27	0.854749	3.47815	1.48	2.09	1.35	0.708134	4.17582	-0.05	0.3	0.08	-0.146615	0.697671	-0.0326797	0.167598	0.0629921
5	300	1.65	1.75	1.41	0.942857	4.07137	1.35	1.94	1.43	0.695876	3.74517	-0.3	0.19	0.02	-0.246981	-0.326205	-0.181818	0.108571	0.0141844
5	300	1.53	1.83	1.41	0.836066	3.94786	1.5	2.16	1.63	0.694444	5.2812	-0.03	0.33	0.22	-0.141621	1.33334	-0.0196078	0.180328	0.156028
5	300	1.52	1.85	1.49	0.821622	4.18988	1.65	2.29	1.55	0.720524	5.85668	0.13	0.44	0.06	-0.101098	1.66679	0.0855263	0.237838	0.0402685
5	300	1.47	1.74	1.4	0.844828	3.58092	1.39	2.25	1.49	0.617778	4.65998	-0.08	0.51	0.09	-0.22705	1.07906	-0.0544218	0.293103	0.0642857
5	300	1.77	1.88	1.43	0.941489	4.75847	1.41	2.08	1.53	0.677885	4.48718	-0.36	0.2	0.1	-0.263605	-0.271284	-0.20339	0.106383	0.0699301
5	300	1.43	1.75	1.28	0.817143	3.2032	1.67	2.46	1.47	0.678862	6.03905	0.24	0.71	0.19	-0.138281	2.83585	0.167832	0.405714	0.148437
5	300	1.39	1.8	1.4	0.772222	3.5028	1.43	2.56	1.66	0.558594	6.07693	0.04	0.76	0.26	-0.213628	2.57413	0.028777	0.422222	0.185714
5	300	1.44	1.78	1.42	0.808989	3.63974	1.51	2.12	1.57	0.712264	5.02588	0.07	0.34	0.15	-0.0967246	1.38614	0.0486111	0.191011	0.105634
5	300	1.56	1.8	1.29	0.866667	3.62232	1.55	2.15	1.63	0.72093	5.43197	-0.01	0.35	0.34	-0.145736	1.80965	-0.00641026	0.194444	0.263566
5	300	1.57	1.84	1.38	0.853261	3.98654	1.85	2.63	1.95	0.703422	9.48772	0.28	0.79	0.57	-0.149839	5.50118	0.178344	0.429348	0.413043
5	300	1.62	1.93	1.51	0.839378	4.72117	2.15	2.63	1.77	0.81749	10.0085	0.53	0.7	0.26	-0.0218877	5.2873	0.32716	0.362694	0.172185
5	300	1.29	1.77	1.31	0.728814	2.99112	N/A	N/A	N/A

## Sheet: Rice
Time (h)	Temperature (℃)	Before Carbonization					After Carbonization
		Length (mm)	Width (mm)	Thickness (mm)	L/W ratio	Volume (mm³)	Length (mm)	Width (mm)	Thickness (mm)	L/W ratio	Volume (mm³)	Length variation	Width variation	Thickness variation	L/W ratio variation	Volume variation	Shrinkage of length	Shrinkage of Width	Shrinkage of Thickness
1	240	4.71	2.75	2.03	1.71273	26.2936	4.88	2.74	2.16	1.78102	28.8818	0.17	-0.01	0.13	0.0682946	2.58822	0.0360934	-0.00363636	0.0640394
1	240	4.98	2.89	2.1	1.72318	30.2236	4.44	2.7	1.85	1.64444	22.1778	-0.54	-0.19	-0.25	-0.0787389	-8.04582	-0.108434	-0.0657439	-0.119048
1	240	5.23	3.13	2.32	1.67093	37.9782	4.35	2.87	2	1.51568	24.969	-0.88	-0.26	-0.32	-0.155247	-13.0092	-0.16826	-0.0830671	-0.137931
1	240	4.56	2.78	2.14	1.64029	27.1284	4.5	2.63	1.86	1.71103	22.0131	-0.06	-0.15	-0.28	0.0707388	-5.11525	-0.0131579	-0.0539568	-0.130841
1	240	5.05	2.95	2.19	1.71186	32.6255	4.75	2.67	1.93	1.77903	24.4772	-0.3	-0.28	-0.26	0.0671618	-8.1483	-0.0594059	-0.0949153	-0.118721
1	240	5.02	2.49	1.93	2.01606	24.1246	4.7	2.83	1.96	1.66078	26.07	-0.32	0.34	0.03	-0.355287	1.94535	-0.063745	0.136546	0.015544
1	240	4.55	2.95	1.99	1.54237	26.7108	4.94	2.77	2.1	1.78339	28.736	0.39	-0.18	0.11	0.241021	2.02521	0.0857143	-0.0610169	0.0552764
1	240	5.03	2.77	2.01	1.81588	28.0055	4.79	2.7	1.98	1.77407	25.6073	-0.24	-0.07	-0.03	-0.0418104	-2.39819	-0.0477137	-0.0252708	-0.0149254
1	240	5.18	2.94	2.27	1.7619	34.5703	4.74	2.92	2.38	1.62329	32.9411	-0.44	-0.02	0.11	-0.138617	-1.62918	-0.0849421	-0.00680272	0.0484581
1	240	6.1	2.89	2.32	2.11073	40.8993	4.7	2.91	2.01	1.61512	27.4908	-1.4	0.02	-0.31	-0.495606	-13.4085	-0.229508	0.00692042	-0.133621
1	240	4.77	3.01	2.25	1.58472	32.3048	4.6	2.56	2.04	1.79687	24.023	-0.17	-0.45	-0.21	0.212157	-8.28178	-0.0356394	-0.149502	-0.0933333
1	240	4.9	3.03	2.58	1.61716	38.3053	4.63	2.92	1.91	1.58562	25.8224	-0.27	-0.11	-0.67	-0.0315453	-12.4828	-0.055102	-0.0363036	-0.25969
1	240	4.81	3.14	2.07	1.53185	31.264	4.82	2.78	1.9	1.73381	25.4592	0.01	-0.36	-0.17	0.201966	-5.8048	0.002079	-0.11465	-0.0821256
1	240	4.97	2.77	2.09	1.79422	28.7728	4.39	2.54	2.06	1.72835	22.9702	-0.58	-0.23	-0.03	-0.0658774	-5.80258	-0.1167	-0.0830325	-0.0143541
1	240	4.86	2.72	2.15	1.78676	28.4213	4.82	2.91	1.87	1.65636	26.229	-0.04	0.19	-0.28	-0.130407	-2.19229	-0.00823045	0.0698529	-0.130233
1	240	4.91	2.93	2.24	1.67577	32.2253	4.42	2.8	1.93	1.57857	23.8857	-0.49	-0.13	-0.31	-0.0971965	-8.33963	-0.0997963	-0.0443686	-0.138393
1	240	5.01	3.15	2.13	1.59048	33.6146	4.33	2.75	2.06	1.57455	24.5295	-0.68	-0.4	-0.07	-0.0159307	-9.08514	-0.135729	-0.126984	-0.0328638
1	240	4.69	2.64	2.18	1.77652	26.9919	4.55	2.9	1.95	1.56897	25.7302	-0.14	0.26	-0.23	-0.20755	-1.26164	-0.0298507	0.0984848	-0.105505
1	240	4.98	3.09	2.07	1.61165	31.8536	4.66	2.75	2.12	1.69455	27.1678	-0.32	-0.34	0.05	0.082895	-4.68577	-0.064257	-0.110032	0.0241546
1	240	4.73	2.89	1.98	1.63668	27.066	4.69	2.29	1.82	2.04803	19.547	-0.04	-0.6	-0.16	0.411357	-7.51902	-0.00845666	-0.207612	-0.0808081
3	240	5.27	3.18	2.28	1.65723	38.2096	4.98	2.96	2.22	1.68243	32.7246	-0.29	-0.22	-0.06	0.0251997	-5.48503	-0.0550285	-0.0691824	-0.0263158
3	240	4.72	2.74	1.92	1.72263	24.831	5.11	2.66	2.22	1.92105	30.1756	0.39	-0.08	0.3	0.198425	5.3446	0.0826271	-0.0291971	0.15625
3	240	4.91	3	2.09	1.63667	30.7857	4.77	3.06	2.12	1.55882	30.9439	-0.14	0.06	0.03	-0.0778431	0.158244	-0.0285132	0.02	0.0143541
3	240	5.4	2.8	2.16	1.92857	32.6592	4.91	2.82	2.03	1.74113	28.1078	-0.49	0.02	-0.13	-0.187437	-4.55141	-0.0907407	0.00714286	-0.0601852
3	240	4.99	3.11	2.26	1.6045	35.0727	4.87	2.46	1.92	1.97967	23.002	-0.12	-0.65	-0.34	0.375173	-12.0707	-0.0240481	-0.209003	-0.150442
3	240	5.42	3	2.13	1.80667	34.6338	4.95	3.04	2.46	1.62829	37.0181	-0.47	0.04	0.33	-0.178377	2.38428	-0.0867159	0.0133333	0.15493
3	240	4.87	2.97	4.87	1.63973	70.4392	4.82	2.98	2.09	1.61745	30.0199	-0.05	0.01	-2.78	-0.022281	-40.4193	-0.0102669	0.003367	-0.570842
3	240	4.85	2.86	1.98	1.6958	27.4646	5.13	2.96	2.28	1.73311	34.6213	0.28	0.1	0.3	0.0373039	7.15676	0.057732	0.034965	0.151515
3	240	5.11	2.99	2.06	1.70903	31.4745	5.27	2.97	2.48	1.77441	38.8167	0.16	-0.02	0.42	0.0653807	7.34218	0.0313112	-0.00668896	0.203883
3	240	5.09	2.82	2.02	1.80496	28.9947	4.75	2.82	2.27	1.6844	30.4066	-0.34	0	0.25	-0.120567	1.41197	-0.0667976	0	0.123762
3	240	4.96	2.94	2.05	1.68707	29.8939	5.12	3.02	2.15	1.69536	33.2442	0.16	0.08	0.1	0.00828941	3.35024	0.0322581	0.0272109	0.0487805
3	240	4.99	3.1	2.15	1.60968	33.2584	4.61	2.91	2.06	1.58419	27.6351	-0.38	-0.19	-0.09	-0.025485	-5.62324	-0.0761523	-0.0612903	-0.0418605
3	240	4.94	3.22	2.02	1.53416	32.1317	4.54	2.86	2.05	1.58741	26.618	-0.4	-0.36	0.03	0.0532511	-5.51372	-0.0809717	-0.111801	0.0148515
3	240	4.74	2.79	2.22	1.69892	29.3586	5.06	2.95	2.09	1.71525	31.1974	0.32	0.16	-0.13	0.0163295	1.83882	0.0675105	0.0573477	-0.0585586
3	240	5.01	3.08	2.12	1.62662	32.7133	4.47	2.63	1.78	1.69962	20.9259	-0.54	-0.45	-0.34	0.0729964	-11.7874	-0.107784	-0.146104	-0.160377
3	240	5.13	2.7	2.12	1.9	29.3641	5.05	2.74	2.21	1.84307	30.5798	-0.08	0.04	0.09	-0.0569343	1.21565	-0.0155945	0.0148148	0.0424528
3	240	4.87	2.72	2.1	1.79044	27.8174	4.77	2.56	2.01	1.86328	24.5445	-0.1	-0.16	-0.09	0.0728401	-3.27293	-0.0205339	-0.0588235	-0.0428571
3	240	5.17	2.91	2.14	1.77663	32.1957	4.56	2.6	1.82	1.75385	21.5779	-0.61	-0.31	-0.32	-0.0227861	-10.6177	-0.117988	-0.106529	-0.149533
3	240	5.1	3.19	2.2	1.59875	35.7918	5.61	2.96	2.18	1.89527	36.2002	0.51	-0.23	-0.02	0.296524	0.408408	0.1	-0.0721003	-0.00909091
3	240	4.85	2.82	1.98	1.71986	27.0805	4.76	2.57	2.38	1.85214	29.115	-0.09	-0.25	0.4	0.132282	2.03456	-0.0185567	-0.0886525	0.20202
5	240	5.03	3.19	2.15	1.5768	34.4983	4.75	3.04	2.43	1.5625	35.0892	-0.28	-0.15	0.28	-0.0143025	0.590945	-0.055666	-0.0470219	0.130233
5	240	4.59	2.72	2.06	1.6875	25.7187	5.64	3.3	2.59	1.70909	48.2051	1.05	0.58	0.53	0.0215909	22.4864	0.228758	0.213235	0.257282
5	240	5	2.96	2.1	1.68919	31.08	5.76	3.06	2.34	1.88235	41.2439	0.76	0.1	0.24	0.193164	10.1639	0.152	0.0337838	0.114286
5	240	4.76	3.06	2.29	1.55556	33.3552	5.22	3.14	2.34	1.66242	38.3545	0.46	0.08	0.05	0.106865	4.99925	0.0966387	0.0261438	0.0218341
5	240	5.05	2.8	2.04	1.80357	28.8456	5.3	3.17	2.68	1.67192	45.0267	0.25	0.37	0.64	-0.131647	16.1811	0.049505	0.132143	0.313725
5	240	5	2.95	2.01	1.69492	29.6475	5.33	3.29	2.14	1.62006	37.5264	0.33	0.34	0.13	-0.0748545	7.8789	0.066	0.115254	0.0646766
5	240	4.96	2.85	2.09	1.74035	29.5442	5.02	2.91	2.23	1.72509	32.5763	0.06	0.06	0.14	-0.015265	3.03205	0.0120968	0.0210526	0.0669856
5	240	5.01	3.07	2.16	1.63192	33.2223	5.38	2.94	2.44	1.82993	38.594	0.37	-0.13	0.28	0.19801	5.37166	0.0738523	-0.0423453	0.12963
5	240	4.86	3.05	2.12	1.59344	31.4248	5.04	2.94	2.39	1.71429	35.4141	0.18	-0.11	0.27	0.120843	3.9893	0.037037	-0.0360656	0.127358
5	240	4.96	2.86	2.25	1.73427	31.9176	4.94	2.74	2.3	1.80292	31.1319	-0.02	-0.12	0.05	0.068654	-0.78572	-0.00403226	-0.041958	0.0222222
5	240	4.58	2.83	2.18	1.61837	28.2559	6.05	3.25	2.47	1.86154	48.5664	1.47	0.42	0.29	0.243164	20.3105	0.320961	0.14841	0.133028
5	240	4.82	2.81	1.99	1.7153	26.953	5.61	2.88	2.52	1.94792	40.7151	0.79	0.07	0.53	0.232614	13.7622	0.1639	0.024911	0.266332
5	240	4.6	3.16	2.41	1.4557	35.0318	5.41	3.25	2.33	1.66462	40.9672	0.81	0.09	-0.08	0.208919	5.93547	0.176087	0.028481	-0.033195
5	240	4.97	2.87	2.06	1.73171	29.3836	5.77	2.88	2.52	2.00347	41.8764	0.8	0.01	0.46	0.271765	12.4927	0.160966	0.00348432	0.223301
5	240	4.79	2.91	2.16	1.64605	30.108	5.12	3	2.19	1.70667	33.6384	0.33	0.09	0.03	0.0606186	3.53038	0.0688935	0.0309278	0.0138889
5	240	4.89	3.04	2.14	1.60855	31.8124	4.86	3.19	2.75	1.52351	42.6344	-0.03	0.15	0.61	-0.0850417	10.822	-0.00613497	0.0493421	0.285047
5	240	4.73	2.83	2.25	1.67138	30.1183	5.21	3.09	2.43	1.68608	39.1203	0.48	0.26	0.18	0.0147061	9.00205	0.10148	0.0918728	0.08
5	240	4.27	2.6	1.89	1.64231	20.9828	4.35	2.76	2.58	1.57609	30.9755	0.08	0.16	0.69	-0.0662207	9.9927	0.0187354	0.0615385	0.365079
5	240	4.8	2.9	2.08	1.65517	28.9536	5.65	3.15	2.71	1.79365	48.2312	0.85	0.25	0.63	0.138478	19.2776	0.177083	0.0862069	0.302885
5	240	4.71	2.57	1.85	1.83268	22.3937	5.16	3.17	2.7	1.62776	44.1644	0.45	0.6	0.85	-0.204925	21.7707	0.0955414	0.233463	0.459459
1	250	5.09	2.85	2.22	1.78596	32.2044	4.95	2.94	2.04	1.68367	29.6881	-0.14	0.09	-0.18	-0.102291	-2.51631	-0.0275049	0.0315789	-0.0810811
1	250	5.09	2.99	2.22	1.70234	33.7864	4.94	3.01	2.05	1.6412	30.4823	-0.15	0.02	-0.17	-0.0611451	-3.30413	-0.0294695	0.00668896	-0.0765766
1	250	5.18	2.74	2.08	1.89051	29.5219	4.87	2.85	2.21	1.70877	30.6737	-0.31	0.11	0.13	-0.181739	1.15184	-0.0598456	0.040146	0.0625
1	250	5.16	3.05	2.18	1.6918	34.3088	4.96	2.55	1.95	1.9451	24.6636	-0.2	-0.5	-0.23	0.253295	-9.64524	-0.0387597	-0.163934	-0.105505
1	250	5.09	3.16	2.13	1.61076	34.2598	4.52	2.81	1.99	1.60854	25.2754	-0.57	-0.35	-0.14	-0.00221857	-8.98438	-0.111984	-0.110759	-0.0657277
1	250	4.76	3.01	2.16	1.5814	30.9476	4.99	2.86	2.14	1.74476	30.5408	0.23	-0.15	-0.02	0.16336	-0.40682	0.0483193	-0.0498339	-0.00925926
1	250	4.94	3.08	2.15	1.6039	32.7127	4.88	2.61	1.98	1.86973	25.2189	-0.06	-0.47	-0.17	0.265836	-7.49382	-0.0121457	-0.152597	-0.0790698
1	250	5.21	2.92	2.19	1.78425	33.3169	4.65	2.74	1.98	1.69708	25.2272	-0.56	-0.18	-0.21	-0.0871663	-8.08973	-0.107486	-0.0616438	-0.0958904
1	250	4.67	2.98	1.99	1.56711	27.694	4.69	2.6	1.92	1.80385	23.4125	0.02	-0.38	-0.07	0.236732	-4.28155	0.00428266	-0.127517	-0.0351759
1	250	4.83	2.97	2.07	1.62626	29.6944	4.83	2.74	2.1	1.76277	27.7918	0	-0.23	0.03	0.136511	-1.90254	0	-0.0774411	0.0144928
1	250	5.11	2.96	2.26	1.72635	34.1839	4.51	2.75	1.91	1.64	23.6888	-0.6	-0.21	-0.35	-0.0863514	-10.4951	-0.117417	-0.0709459	-0.154867
1	250	4.87	3.2	2.08	1.52187	32.4147	4.85	2.63	2.1	1.84411	26.7865	-0.02	-0.57	0.02	0.322231	-5.62817	-0.00410678	-0.178125	0.00961538
1	250	4.89	3.04	2.09	1.60855	31.0691	4.37	2.79	1.95	1.56631	23.775	-0.52	-0.25	-0.14	-0.0422444	-7.29412	-0.106339	-0.0822368	-0.0669856
1	250	5.04	2.9	2.04	1.73793	29.8166	4.69	3.03	2.03	1.54785	28.8477	-0.35	0.13	-0.01	-0.190076	-0.968919	-0.0694444	0.0448276	-0.00490196
1	250	4.62	2.62	2.09	1.76336	25.2982	4.61	2.83	1.92	1.62898	25.0489	-0.01	0.21	-0.17	-0.134384	-0.2493	-0.0021645	0.0801527	-0.0813397
1	250	5.14	3.21	2.09	1.60125	34.4837	4.43	2.49	1.97	1.77912	21.7305	-0.71	-0.72	-0.12	0.17787	-12.7533	-0.138132	-0.224299	-0.0574163
1	250	5.18	3.04	2.18	1.70395	34.3289	4.8	3.01	2.01	1.59468	29.0405	-0.38	-0.03	-0.17	-0.109263	-5.28842	-0.0733591	-0.00986842	-0.0779817
1	250	5.25	2.66	2.12	1.97368	29.6058	4.97	2.85	2.12	1.74386	30.0287	-0.28	0.19	0	-0.229825	0.42294	-0.0533333	0.0714286	0
1	250	4.98	2.92	2.17	1.70548	31.5553	4.84	3.02	1.99	1.60265	29.0874	-0.14	0.1	-0.18	-0.10283	-2.46784	-0.0281124	0.0342466	-0.0829493
1	250	5.21	2.89	2.25	1.80277	33.878	4.83	2.75	2.04	1.75636	27.0963	-0.38	-0.14	-0.21	-0.0464045	-6.78172	-0.0729367	-0.0484429	-0.0933333
3	250	4.96	3.02	2.14	1.64238	32.0555	5.54	3.3	2.68	1.67879	48.9958	0.58	0.28	0.54	0.0364038	16.9403	0.116935	0.0927152	0.252336
3	250	4.78	2.64	2.25	1.81061	28.3932	6.31	3.02	2.49	2.0894	47.4499	1.53	0.38	0.24	0.278798	19.0567	0.320084	0.143939	0.106667
3	250	5.14	2.78	2.15	1.84892	30.7218	5.95	2.98	2.53	1.99664	44.8594	0.81	0.2	0.38	0.147723	14.1377	0.157588	0.0719424	0.176744
3	250	5.07	3.14	2.18	1.61465	34.7052	5.86	3.56	2.94	1.64607	61.3331	0.79	0.42	0.76	0.0314177	26.6279	0.155819	0.133758	0.348624
3	250	4.98	3.05	2.38	1.63279	36.1498	6.33	3.13	2.64	2.02236	52.3061	1.35	0.08	0.26	0.389577	16.1562	0.271084	0.0262295	0.109244
3	250	4.83	2.93	1.91	1.64846	27.0301	5.79	3.2	2.96	1.80937	54.8429	0.96	0.27	1.05	0.160911	27.8128	0.198758	0.0921502	0.549738
3	250	5.18	2.91	2.21	1.78007	33.3131	5.63	3.29	2.52	1.71125	46.6772	0.45	0.38	0.31	-0.0688225	13.3641	0.0868726	0.130584	0.140271
3	250	5.08	3.11	2.2	1.63344	34.7574	5.12	3.27	2.76	1.56575	46.209	0.04	0.16	0.56	-0.0676913	11.4517	0.00787402	0.0514469	0.254545
3	250	5.21	2.8	2.35	1.86071	34.2818	5.98	3.08	2.37	1.94156	43.6516	0.77	0.28	0.02	0.0808442	9.36981	0.147793	0.1	0.00851064
3	250	4.87	2.96	2.14	1.64527	30.8485	5.54	3.04	2.79	1.82237	46.9881	0.67	0.08	0.65	0.177098	16.1395	0.137577	0.027027	0.303738
3	250	4.86	3	1.99	1.62	29.0142	4.89	3.05	2.31	1.60328	34.4525	0.03	0.05	0.32	-0.0167213	5.43829	0.00617284	0.0166667	0.160804
3	250	5.26	2.98	2.18	1.7651	34.1711	6.31	3.57	3.12	1.76751	70.2833	1.05	0.59	0.94	0.00240633	36.1122	0.19962	0.197987	0.431193
3	250	4.93	2.86	2.11	1.72378	29.7506	5.82	3.33	2.4	1.74775	46.5134	0.89	0.47	0.29	0.0239715	16.7629	0.180527	0.164336	0.137441
3	250	5.02	2.82	2.15	1.78014	30.4363	5.64	3.33	2.41	1.69369	45.2627	0.62	0.51	0.26	-0.0864482	14.8264	0.123506	0.180851	0.12093
3	250	4.85	2.8	2.01	1.73214	27.2958	5.68	3.17	3.11	1.7918	55.9974	0.83	0.37	1.1	0.0596553	28.7016	0.171134	0.132143	0.547264
3	250	5.09	3.01	2.14	1.69103	32.7867	6	2.76	2.5	2.17391	41.4	0.91	-0.25	0.36	0.482883	8.61327	0.178782	-0.0830565	0.168224
3	250	5.07	2.9	2.26	1.74828	33.2288	5.38	2.9	2.32	1.85517	36.1966	0.31	0	0.06	0.106897	2.96786	0.061144	0	0.0265487
3	250	5.07	3.11	2.12	1.63023	33.4275	6.3	2.52	2.82	2.5	44.7703	1.23	-0.59	0.7	0.869775	11.3428	0.242604	-0.189711	0.330189
3	250	4.99	3.14	2.19	1.58917	34.3142	5.72	3.01	2.49	1.90033	42.8708	0.73	-0.13	0.3	0.31116	8.55659	0.146293	-0.0414013	0.136986
3	250	5.27	2.4	1.97	2.19583	24.9166	6.32	3.1	2.53	2.03871	49.5678	1.05	0.7	0.56	-0.157124	24.6512	0.199241	0.291667	0.284264
5	250	4.56	2.56	1.91	1.78125	22.2966	5.52	2.84	2.3	1.94366	36.0566	0.96	0.28	0.39	0.162412	13.7601	0.210526	0.109375	0.204188
5	250	4.75	3.09	2.38	1.53722	34.9324	5.27	3.05	2.34	1.72787	37.612	0.52	-0.04	-0.04	0.190652	2.67954	0.109474	-0.012945	-0.0168067
5	250	4.68	2.65	2.09	1.76604	25.9202	6.46	3.04	2.38	2.125	46.7394	1.78	0.39	0.29	0.358962	20.8192	0.380342	0.14717	0.138756
5	250	4.95	3	2.19	1.65	32.5215	5.66	3.04	2.45	1.86184	42.1557	0.71	0.04	0.26	0.211842	9.63418	0.143434	0.0133333	0.118721
5	250	4.86	2.85	2.34	1.70526	32.4113	5.97	2.88	2.23	2.07292	38.3417	1.11	0.03	-0.11	0.367654	5.93039	0.228395	0.0105263	-0.0470085
5	250	4.95	2.78	2.12	1.78058	29.1733	5.83	3.48	2.33	1.67529	47.272	0.88	0.7	0.21	-0.105288	18.0987	0.177778	0.251799	0.0990566
5	250	5.06	2.86	2.02	1.76923	29.2326	5.83	3.23	2.37	1.80495	44.6292	0.77	0.37	0.35	0.0357228	15.3966	0.152174	0.129371	0.173267
5	250	4.95	3.04	2.1	1.62829	31.6008	5.79	2.82	2.67	2.05319	43.5952	0.84	-0.22	0.57	0.424902	11.9944	0.169697	-0.0723684	0.271429
5	250	4.92	2.96	2.05	1.66216	29.8546	6	3.03	2.84	1.9802	51.6312	1.08	0.07	0.79	0.318036	21.7766	0.219512	0.0236486	0.385366
5	250	4.73	2.91	2.16	1.62543	29.7309	5.33	3.02	2.82	1.7649	45.3924	0.6	0.11	0.66	0.139471	15.6615	0.12685	0.0378007	0.305556
5	250	4.97	2.86	2.14	1.73776	30.4184	5.03	2.59	2.44	1.94208	31.7876	0.06	-0.27	0.3	0.204323	1.3692	0.0120724	-0.0944056	0.140187
5	250	4.87	2.76	2.01	1.76449	27.0168	5.27	3.02	2.57	1.74503	40.9026	0.4	0.26	0.56	-0.0194596	13.8858	0.0821355	0.0942029	0.278607
5	250	5.03	3.03	1.92	1.66007	29.2625	3.02	2.89	2.21	1.04498	19.2884	-2.01	-0.14	0.29	-0.615083	-9.97409	-0.399602	-0.0462046	0.151042
5	250	5.3	2.7	2.2	1.96296	31.482	5.96	2.9	2.14	2.05517	36.9878	0.66	0.2	-0.06	0.0922095	5.50576	0.124528	0.0740741	-0.0272727
5	250	4.94	3.27	2.1	1.5107	33.923	5.2	2.66	2.49	1.95489	34.4417	0.26	-0.61	0.39	0.444184	0.5187	0.0526316	-0.186544	0.185714
5	250	5.19	2.84	2.04	1.82746	30.0688	6.25	2.97	1.93	2.10438	35.8256	1.06	0.13	-0.11	0.276912	5.75684	0.204239	0.0457746	-0.0539216
5	250	4.94	3	2.04	1.64667	30.2328	5.21	2.94	2.74	1.77211	41.9697	0.27	-0.06	0.7	0.125442	11.7369	0.0546559	-0.02	0.343137
5	250	4.89	3.12	2.11	1.56731	32.1918	5.8	2.94	2.56	1.97279	43.6531	0.91	-0.18	0.45	0.405481	11.4613	0.186094	-0.0576923	0.21327
5	250	4.92	3.02	2.11	1.62914	31.3512	5.52	3.04	3.23	1.81579	54.202	0.6	0.02	1.12	0.18665	22.8508	0.121951	0.00662252	0.530806
5	250	5.02	3.1	2.15	1.61935	33.4583	5.85	2.84	2.67	2.05986	44.3594	0.83	-0.26	0.52	0.440504	10.9011	0.165339	-0.083871	0.24186
1	260	5.16	3.19	2.3	1.61755	37.8589	4.7	2.78	2.18	1.69065	28.4839	-0.46	-0.41	-0.12	0.0730926	-9.37504	-0.0891473	-0.128527	-0.0521739
1	260	5.08	2.85	2.1	1.78246	30.4038	4.82	2.8	2.05	1.72143	27.6668	-0.26	-0.05	-0.05	-0.0610276	-2.737	-0.0511811	-0.0175439	-0.0238095
1	260	4.85	3.02	2.25	1.60596	32.9557	4.8	2.9	2.1	1.65517	29.232	-0.05	-0.12	-0.15	0.0492121	-3.72375	-0.0103093	-0.0397351	-0.0666667
1	260	4.94	2.83	2.3	1.74558	32.1545	4.87	2.65	2.07	1.83774	26.7144	-0.07	-0.18	-0.23	0.0921528	-5.44008	-0.01417	-0.0636042	-0.1
1	260	4.97	3	2.14	1.65667	31.9074	4.68	2.85	2.08	1.64211	27.743	-0.29	-0.15	-0.06	-0.0145614	-4.16436	-0.0583501	-0.05	-0.0280374
1	260	5.04	2.95	2.22	1.70847	33.007	5.05	2.78	2.03	1.81655	28.4992	0.01	-0.17	-0.19	0.108072	-4.50779	0.00198413	-0.0576271	-0.0855856
1	260	5.36	2.9	2.15	1.84828	33.4196	5.06	2.64	2.14	1.91667	28.587	-0.3	-0.26	-0.01	0.0683908	-4.83262	-0.0559701	-0.0896552	-0.00465116
1	260	5.03	2.95	2.38	1.70508	35.3156	4.74	2.82	1.96	1.68085	26.1989	-0.29	-0.13	-0.42	-0.0242337	-9.1167	-0.0576541	-0.0440678	-0.176471
1	260	5.32	2.77	2.21	1.92058	32.5674	4.64	2.58	2	1.79845	23.9424	-0.68	-0.19	-0.21	-0.122128	-8.62504	-0.12782	-0.0685921	-0.0950226
1	260	4.84	2.98	2.17	1.62416	31.2983	4.68	2.88	1.99	1.625	26.822	-0.16	-0.1	-0.18	0.000838926	-4.47633	-0.0330579	-0.033557	-0.0829493
1	260	5	2.97	2.23	1.6835	33.1155	4.9	2.76	2.04	1.77536	27.589	-0.1	-0.21	-0.19	0.0918606	-5.52654	-0.02	-0.0707071	-0.0852018
1	260	5.13	2.85	2.18	1.8	31.8727	4.9	2.89	1.98	1.6955	28.0388	-0.23	0.04	-0.2	-0.104498	-3.83391	-0.0448343	0.0140351	-0.0917431
1	260	4.74	2.94	2.17	1.61224	30.2403	4.69	2.69	2.13	1.74349	26.8723	-0.05	-0.25	-0.04	0.13125	-3.36796	-0.0105485	-0.085034	-0.0184332
1	260	4.95	2.66	2.18	1.8609	28.7041	4.61	2.78	2.05	1.65827	26.2724	-0.34	0.12	-0.13	-0.202629	-2.43167	-0.0686869	0.0451128	-0.059633
1	260	5.18	2.85	2.17	1.81754	32.0357	4.75	2.92	2.05	1.62671	28.4335	-0.43	0.07	-0.12	-0.190832	-3.60221	-0.0830116	0.0245614	-0.0552995
1	260	5	3.16	2.07	1.58228	32.706	4.48	2.98	2.04	1.50336	27.2348	-0.52	-0.18	-0.03	-0.0789228	-5.47118	-0.104	-0.056962	-0.0144928
1	260	4.91	2.94	2.09	1.67007	30.17	4.9	2.98	2.21	1.6443	32.2704	-0.01	0.04	0.12	-0.0257727	2.10043	-0.00203666	0.0136054	0.0574163
1	260	5.03	2.96	2.25	1.69932	33.4998	4.44	2.7	2.03	1.64444	24.3356	-0.59	-0.26	-0.22	-0.0548799	-9.16416	-0.117296	-0.0878378	-0.0977778
1	260	4.99	2.58	2.27	1.93411	29.2244	4.8	2.97	1.99	1.61616	28.3694	-0.19	0.39	-0.28	-0.317947	-0.854994	-0.0380762	0.151163	-0.123348
1	260	4.75	3.13	2.15	1.51757	31.9651	4.77	2.73	2.11	1.74725	27.4766	0.02	-0.4	-0.04	0.229681	-4.48849	0.00421053	-0.127796	-0.0186047
3	260	5.05	2.98	2.19	1.69463	32.9573	5.71	3.24	2.19	1.76235	40.5159	0.66	0.26	0	0.0677148	7.55857	0.130693	0.0872483	0
3	260	5.05	3.02	2.14	1.67219	32.6371	6.33	3.4	3.06	1.86176	65.8573	1.28	0.38	0.92	0.189579	33.2202	0.253465	0.125828	0.429907
3	260	4.98	3.19	2.25	1.56113	35.7439	5.74	3.32	2.55	1.72892	48.5948	0.76	0.13	0.3	0.167787	12.8509	0.15261	0.0407524	0.133333
3	260	4.76	2.8	2.09	1.7	27.8555	6.27	3.41	3.22	1.83871	68.8459	1.51	0.61	1.13	0.13871	40.9903	0.317227	0.217857	0.54067
3	260	4.86	3.12	2.21	1.55769	33.5107	6.13	3.23	2.62	1.89783	51.8757	1.27	0.11	0.41	0.340141	18.3651	0.261317	0.0352564	0.18552
3	260	4.76	2.85	1.99	1.67018	26.9963	6.66	3.19	2.35	2.08777	49.9267	1.9	0.34	0.36	0.417599	22.9304	0.39916	0.119298	0.180905
3	260	4.93	2.87	2.21	1.71777	31.2695	6.04	2.91	2.46	2.0756	43.2379	1.11	0.04	0.25	0.357831	11.9684	0.225152	0.0139373	0.113122
3	260	4.62	2.92	1.95	1.58219	26.3063	5.78	3.41	2.91	1.69501	57.3555	1.16	0.49	0.96	0.112823	31.0492	0.251082	0.167808	0.492308
3	260	5.1	3.08	2.05	1.65584	32.2014	5.71	2.85	2.47	2.00351	40.1955	0.61	-0.23	0.42	0.347665	7.99415	0.119608	-0.0746753	0.204878
3	260	5	3	2.11	1.66667	31.65	5.76	2.84	2.55	2.02817	41.7139	0.76	-0.16	0.44	0.361502	10.0639	0.152	-0.0533333	0.208531
3	260	5.05	3.23	2.25	1.56347	36.7009	5.67	3.2	2.72	1.77187	49.3517	0.62	-0.03	0.47	0.208408	12.6508	0.122772	-0.00928793	0.208889
3	260	5.01	3.17	2.13	1.58044	33.828	6.67	3.25	2.6	2.05231	56.3615	1.66	0.08	0.47	0.471866	22.5335	0.331337	0.0252366	0.220657
3	260	4.91	3.06	2.26	1.60458	33.9556	6.11	3.12	2.77	1.95833	52.8051	1.2	0.06	0.51	0.353758	18.8495	0.244399	0.0196078	0.225664
3	260	4.86	2.92	2.03	1.66438	28.8081	5.29	3.05	3.15	1.73443	50.8237	0.43	0.13	1.12	0.0700427	22.0155	0.0884774	0.0445205	0.551724
3	260	4.89	2.83	2.27	1.72792	31.4138	6.09	3.13	2.73	1.94569	52.0384	1.2	0.3	0.46	0.217772	20.6246	0.245399	0.106007	0.202643
3	260	4.52	3.24	2.4	1.39506	35.1475	6.02	3.34	3.17	1.8024	63.7386	1.5	0.1	0.77	0.407333	28.591	0.331858	0.0308642	0.320833
3	260	4.99	3.25	2.19	1.53538	35.5163	6.35	3.41	2.81	1.86217	60.8463	1.36	0.16	0.62	0.326785	25.33	0.272545	0.0492308	0.283105
3	260	5.03	2.95	2.13	1.70508	31.606	6.23	3.41	3.1	1.82698	65.8573	1.2	0.46	0.97	0.121895	34.2513	0.238569	0.155932	0.455399
3	260	4.86	2.99	2.19	1.62542	31.8238	5.73	3.56	2.98	1.60955	60.7884	0.87	0.57	0.79	-0.0158675	28.9647	0.179012	0.190635	0.360731
3	260	4.98	3.14	2.29	1.58599	35.8092	5.98	3.12	2.96	1.91667	55.2265	1	-0.02	0.67	0.330679	19.4173	0.200803	-0.00636943	0.292576
5	260	4.46	2.98	2.25	1.49664	29.9043	5.56	2.92	2.66	1.90411	43.1856	1.1	-0.06	0.41	0.407465	13.2813	0.246637	-0.0201342	0.182222
5	260	5	2.92	2.33	1.71233	34.018	6	3.23	2.6	1.85759	50.388	1	0.31	0.27	0.145256	16.37	0.2	0.106164	0.11588
5	260	4.93	3.18	2.31	1.55031	36.2148	5.89	3.02	2.81	1.95033	49.9837	0.96	-0.16	0.5	0.400017	13.7689	0.194726	-0.0503145	0.21645
5	260	4.96	2.92	2.15	1.69863	31.1389	6.17	3.26	2.34	1.89264	47.0672	1.21	0.34	0.19	0.194008	15.9283	0.243952	0.116438	0.0883721
5	260	4.67	2.75	1.99	1.69818	25.5566	5.95	3.12	2.16	1.90705	40.0982	1.28	0.37	0.17	0.208869	14.5417	0.27409	0.134545	0.0854271
5	260	4.94	3.07	2.21	1.60912	33.5164	6.49	2.66	2.44	2.43985	42.1227	1.55	-0.41	0.23	0.830729	8.60628	0.313765	-0.13355	0.104072
5	260	4.91	2.88	2.13	1.70486	30.1199	5.7	2.81	2.21	2.02847	35.3976	0.79	-0.07	0.08	0.323609	5.27767	0.160896	-0.0243056	0.0375587
5	260	5.12	3.13	2.12	1.63578	33.9743	6.05	2.49	3.22	2.42972	48.5077	0.93	-0.64	1.1	0.793936	14.5334	0.181641	-0.204473	0.518868
5	260	4.58	2.94	2.16	1.55782	29.0848	6.84	3.02	2.57	2.2649	53.088	2.26	0.08	0.41	0.707078	24.0031	0.49345	0.0272109	0.189815
5	260	5.07	3.11	2.13	1.63023	33.5852	4.99	3.13	2.75	1.59425	42.9514	-0.08	0.02	0.62	-0.0359759	9.36622	-0.0157791	0.00643087	0.29108
5	260	4.48	2.94	1.94	1.52381	25.5521	6.35	2.74	2.27	2.31752	39.4957	1.87	-0.2	0.33	0.793709	13.9436	0.417411	-0.0680272	0.170103
5	260	4.97	3.06	2.05	1.62418	31.1768	5.14	2.9	2.52	1.77241	37.5631	0.17	-0.16	0.47	0.148231	6.38631	0.0342052	-0.0522876	0.229268
5	260	4.76	2.95	2	1.61356	28.084	5.95	3.63	3.11	1.63912	67.1713	1.19	0.68	1.11	0.0255591	39.0873	0.25	0.230508	0.555
5	260	5.15	2.79	2.06	1.84588	29.5991	4.95	2.89	2.53	1.7128	36.1929	-0.2	0.1	0.47	-0.133075	6.5938	-0.038835	0.0358423	0.228155
5	260	5.02	3.03	2.21	1.65677	33.6154	6.31	3.16	2.35	1.99684	46.8581	1.29	0.13	0.14	0.34007	13.2426	0.256972	0.0429043	0.0633484
5	260	4.92	2.81	2.1	1.75089	29.0329	5.53	2.83	2.71	1.95406	42.4112	0.61	0.02	0.61	0.203174	13.3783	0.123984	0.00711744	0.290476
5	260	4.26	2.88	1.93	1.47917	23.6788	5.25	2.69	2.31	1.95167	32.623	0.99	-0.19	0.38	0.472506	8.94419	0.232394	-0.0659722	0.196891
5	260	5.15	3.11	2.25	1.65595	36.0371	5.77	3.59	2.89	1.60724	59.8643	0.62	0.48	0.64	-0.0487062	23.8272	0.120388	0.154341	0.284444
5	260	4.99	3	2.13	1.66333	31.8861	6.33	2.55	2.85	2.48235	46.0033	1.34	-0.45	0.72	0.81902	14.1172	0.268537	-0.15	0.338028
5	260	4.34	2.72	2.06	1.59559	24.3179	5.59	3.15	2.5	1.7746	44.0212	1.25	0.43	0.44	0.179015	19.7034	0.288018	0.158088	0.213592
1	270	5.03	2.83	2.17	1.77739	30.8897	5.76	4.01	3.37	1.43641	77.8389	0.73	1.18	1.2	-0.340976	46.9492	0.145129	0.416961	0.552995
1	270	5.01	2.87	2.26	1.74564	32.4959	5.87	3.11	3.32	1.88746	60.6089	0.86	0.24	1.06	0.141815	28.1131	0.171657	0.0836237	0.469027
1	270	5.07	2.86	2.31	1.77273	33.4955	6.57	3.46	3.12	1.89884	70.9245	1.5	0.6	0.81	0.126117	37.429	0.295858	0.20979	0.350649
1	270	4.77	2.83	2.11	1.68551	28.4831	6.7	3.34	2.8	2.00599	62.6584	1.93	0.51	0.69	0.320476	34.1753	0.404612	0.180212	0.327014
1	270	5.05	3.04	2.2	1.66118	33.7744	6.07	3.87	3.7	1.56848	86.9163	1.02	0.83	1.5	-0.0927088	53.1419	0.20198	0.273026	0.681818
1	270	4.69	2.98	2.03	1.57383	28.3717	6.52	3.5	2.28	1.86286	52.0296	1.83	0.52	0.25	0.289032	23.6579	0.390192	0.174497	0.123153
1	270	5.12	2.89	2.04	1.77163	30.1855	6.8	3.13	3.2	2.17252	68.1088	1.68	0.24	1.16	0.400898	37.9233	0.328125	0.083045	0.568627
1	270	4.59	3.08	2.37	1.49026	33.5052	6.95	3.67	3.74	1.89373	95.3943	2.36	0.59	1.37	0.403473	61.8891	0.514161	0.191558	0.578059
1	270	4.54	2.98	2.08	1.52349	28.1407	7.32	3.77	3.02	1.94164	83.3411	2.78	0.79	0.94	0.418155	55.2004	0.612335	0.265101	0.451923
1	270	5.06	2.71	2.2	1.86716	30.1677	7.25	3.32	3.48	2.18373	83.7636	2.19	0.61	1.28	0.316576	53.5959	0.432806	0.225092	0.581818
1	270	5.4	3.06	2.15	1.76471	35.5266	5.52	3.13	3.12	1.76358	53.9061	0.12	0.07	0.97	-0.00112761	18.3795	0.0222222	0.0228758	0.451163
1	270	4.93	3.01	2.12	1.63787	31.4593	6.63	3.14	3.31	2.11146	68.9082	1.7	0.13	1.19	0.473591	37.4489	0.344828	0.0431894	0.561321
1	270	4.94	2.7	2.1	1.82963	28.0098	6.03	2.88	3.78	2.09375	65.645	1.09	0.18	1.68	0.26412	37.6352	0.220648	0.0666667	0.8
1	270	5	2.86	2.13	1.74825	30.459	6.17	3.21	2.57	1.92212	50.9006	1.17	0.35	0.44	0.173867	20.4416	0.234	0.122378	0.206573
1	270	4.83	2.98	2.13	1.62081	30.6579	6.34	3.46	3.29	1.83237	72.1708	1.51	0.48	1.16	0.211565	41.5128	0.312629	0.161074	0.544601
1	270	4.51	2.82	2	1.59929	25.4364	6.34	3.23	2.92	1.96285	59.7963	1.83	0.41	0.92	0.363558	34.3599	0.405765	0.14539	0.46
1	270	4.96	2.94	2.04	1.68707	29.7481	6.98	3.28	3.18	2.12805	72.8042	2.02	0.34	1.14	0.440974	43.0561	0.407258	0.115646	0.558824
1	270	4.87	3.05	2.14	1.59672	31.7865	6.68	3.82	4.37	1.74869	111.512	1.81	0.77	2.23	0.15197	79.7254	0.371663	0.252459	1.04206
1	270	4.8	2.91	2.25	1.64948	31.428	7.17	4.46	3.43	1.60762	109.685	2.37	1.55	1.18	-0.0418612	78.2572	0.49375	0.532646	0.524444
1	270	5.18	3.18	2.15	1.62893	35.4157	7.65	3.85	3.12	1.98701	91.8918	2.47	0.67	0.97	0.358082	56.4761	0.476834	0.210692	0.451163
3	270	5.03	2.82	2.16	1.78369	30.6387	5.54	3.16	2.81	1.75316	49.193	0.51	0.34	0.65	-0.0305234	18.5542	0.101392	0.120567	0.300926
3	270	4.65	3.01	2.27	1.54485	31.7721	6.15	3.31	2.52	1.85801	51.2984	1.5	0.3	0.25	0.313156	19.5263	0.322581	0.0996678	0.110132
3	270	5.12	2.77	2.39	1.84838	33.8959	6.13	3.06	3.12	2.00327	58.5243	1.01	0.29	0.73	0.154893	24.6284	0.197266	0.104693	0.305439
3	270	4.64	2.85	2.05	1.62807	27.1092	6.31	3.2	2.66	1.97187	53.7107	1.67	0.35	0.61	0.343805	26.6015	0.359914	0.122807	0.297561
3	270	4.88	2.96	2.18	1.64865	31.4897	6.45	3.28	2.9	1.96646	61.3524	1.57	0.32	0.72	0.317815	29.8627	0.321721	0.108108	0.330275
3	270	4.95	2.85	2.09	1.73684	29.4847	6.41	3.4	2.62	1.88529	57.1003	1.46	0.55	0.53	0.148452	27.6156	0.294949	0.192982	0.253589
3	270	4.81	2.87	2.27	1.67596	31.3367	6.25	3.5	2.99	1.78571	65.4062	1.44	0.63	0.72	0.109756	34.0696	0.299376	0.219512	0.317181
3	270	5.01	2.6	2.05	1.92692	26.7033	5.61	3.37	3.44	1.66469	65.0356	0.6	0.77	1.39	-0.262235	38.3323	0.11976	0.296154	0.678049
3	270	4.98	2.7	2.15	1.84444	28.9089	5.8	2.98	2.35	1.94631	40.6174	0.82	0.28	0.2	0.101864	11.7085	0.164659	0.103704	0.0930233
3	270	5.06	3.16	2.17	1.60127	34.6974	5.98	3.09	2.87	1.93528	53.0324	0.92	-0.07	0.7	0.334009	18.335	0.181818	-0.0221519	0.322581
3	270	4.88	3.02	2.24	1.61589	33.0122	6.93	3.64	2.77	1.90385	69.8738	2.05	0.62	0.53	0.287952	36.8616	0.420082	0.205298	0.236607
3	270	5.11	3.1	2.32	1.64839	36.7511	5.48	3.23	3.33	1.69659	58.9423	0.37	0.13	1.01	0.0482073	22.1912	0.072407	0.0419355	0.435345
3	270	4.97	2.86	2.12	1.73776	30.1341	5.99	2.97	2.67	2.01684	47.5001	1.02	0.11	0.55	0.279073	17.366	0.205231	0.0384615	0.259434
3	270	4.81	3.01	2.02	1.59801	29.2458	6.28	3.14	3.4	2	67.0453	1.47	0.13	1.38	0.401993	37.7995	0.305613	0.0431894	0.683168
3	270	4.75	2.68	2.01	1.77239	25.5873	6.35	3.47	2.88	1.82997	63.4594	1.6	0.79	0.87	0.0575831	37.8721	0.336842	0.294776	0.432836
3	270	4.93	3.03	2.03	1.62706	30.3239	5.97	2.83	2.9	2.10954	48.9958	1.04	-0.2	0.87	0.482478	18.6719	0.210953	-0.0660066	0.428571
3	270	5.1	2.95	2.37	1.72881	35.6566	5.24	3.36	2.86	1.55952	50.3543	0.14	0.41	0.49	-0.16929	14.6977	0.027451	0.138983	0.206751
3	270	5.13	2.71	2.33	1.89299	32.3924	6.31	2.71	2.72	2.32841	46.5123	1.18	0	0.39	0.435424	14.1199	0.230019	0	0.167382
3	270	4.79	2.96	2.11	1.61824	29.9164	5.69	2.89	3.02	1.96886	49.6612	0.9	-0.07	0.91	0.350615	19.7448	0.187891	-0.0236486	0.43128
3	270	5.25	3.14	2.22	1.67197	36.5967	5.56	3.24	2.9	1.71605	52.2418	0.31	0.1	0.68	0.0440749	15.6451	0.0590476	0.0318471	0.306306
5	270	4.87	3.33	2.44	1.46246	39.5697	6.01	3.56	2.44	1.6882	52.2053	1.14	0.23	0	0.22574	12.6355	0.234086	0.0690691	0
5	270	5.07	2.99	2.1	1.69565	31.8345	6.26	3.09	3.09	2.02589	59.7711	1.19	0.1	0.99	0.330238	27.9366	0.234714	0.0334448	0.471429
5	270	4.89	3.02	2.21	1.61921	32.6368	5.22	2.99	3.47	1.74582	54.1591	0.33	-0.03	1.26	0.126614	21.5222	0.0674847	-0.00993377	0.570136
5	270	4.94	3.12	2.12	1.58333	32.6751	5.77	2.87	2.46	2.01045	40.7374	0.83	-0.25	0.34	0.42712	8.06222	0.168016	-0.0801282	0.160377
5	270	4.96	2.91	2.15	1.70447	31.0322	5.75	2.88	3.14	1.99653	51.9984	0.79	-0.03	0.99	0.29206	20.9662	0.159274	-0.0103093	0.460465
5	270	4.94	2.91	2.08	1.69759	29.9008	5.19	3.39	2.82	1.53097	49.6154	0.25	0.48	0.74	-0.166621	19.7145	0.0506073	0.164948	0.355769
5	270	4.76	2.81	2.25	1.69395	30.0951	6.5	3.47	2.49	1.8732	56.162	1.74	0.66	0.24	0.179249	26.0669	0.365546	0.234875	0.106667
5	270	4.9	2.93	2.07	1.67235	29.719	5.91	2.86	2.34	2.06643	39.5521	1.01	-0.07	0.27	0.394079	9.83309	0.206122	-0.0238908	0.130435
5	270	4.94	3.05	2.27	1.61967	34.2021	6.61	3.28	2.81	2.01524	60.923	1.67	0.23	0.54	0.395572	26.721	0.338057	0.0754098	0.237885
5	270	5.01	2.94	2.22	1.70408	32.6993	6.03	3.27	2.6	1.84404	51.2671	1.02	0.33	0.38	0.139955	18.5678	0.203593	0.112245	0.171171
5	270	4.93	2.9	2.2	1.7	31.4534	6.39	3.23	3.58	1.97833	73.8901	1.46	0.33	1.38	0.278328	42.4367	0.296146	0.113793	0.627273
5	270	4.64	2.97	2.17	1.56229	29.9043	6.4	3.18	2.66	2.01258	54.1363	1.76	0.21	0.49	0.450289	24.232	0.37931	0.0707071	0.225806
5	270	4.74	2.88	2.07	1.64583	28.258	6.14	3.21	2.88	1.91277	56.7631	1.4	0.33	0.81	0.266939	28.5051	0.295359	0.114583	0.391304
5	270	4.87	2.84	2.08	1.71479	28.7681	6.08	3.16	2.41	1.92405	46.3028	1.21	0.32	0.33	0.209262	17.5348	0.24846	0.112676	0.158654
5	270	5.18	2.92	2.17	1.77397	32.8226	6.45	3.44	3.01	1.875	66.7859	1.27	0.52	0.84	0.101027	33.9633	0.245174	0.178082	0.387097
5	270	4.76	2.8	2.03	1.7	27.0558	6.6	3.29	2.79	2.00608	60.5821	1.84	0.49	0.76	0.306079	33.5262	0.386555	0.175	0.374384
5	270	4.32	2.83	2.17	1.5265	26.5296	5.49	2.89	3.59	1.89965	56.9593	1.17	0.06	1.42	0.373152	30.4297	0.270833	0.0212014	0.654378
5	270	4.98	2.86	2.16	1.74126	30.7644	5.67	2.82	2.73	2.01064	43.6511	0.69	-0.04	0.57	0.26938	12.8866	0.138554	-0.013986	0.263889
5	270	4.69	2.97	2.36	1.57912	32.8731	5.36	3.55	3	1.50986	57.084	0.67	0.58	0.64	-0.0692654	24.2109	0.142857	0.195286	0.271186
5	270	5.17	3.01	2.39	1.71761	37.1925	6.24	N/A	N/A
1	280	4.99	2.95	2.22	1.69153	32.6795	6.11	3.55	3.12	1.72113	67.6744	1.12	0.6	0.9	0.0296013	34.9948	0.224449	0.20339	0.405405
1	280	5.35	2.89	2.23	1.85121	34.4791	7.61	4	4.5	1.9025	136.98	2.26	1.11	2.27	0.0512889	102.501	0.42243	0.384083	1.01794
1	280	4.9	2.94	2.18	1.66667	31.4051	N/A	N/A	N/A
1	280	4.85	2.93	2.15	1.65529	30.5526	N/A	N/A	N/A
1	280	5.2	2.74	2.29	1.89781	32.6279	N/A	N/A	N/A
1	280	4.9	3.04	2.08	1.61184	30.9837	N/A	N/A	N/A
1	280	4.82	2.94	2.37	1.63946	33.5848	N/A	N/A	N/A
1	280	4.83	3.29	2.28	1.46809	36.2308	N/A	N/A	N/A
1	280	4.97	3.12	2.15	1.59295	33.3388	N/A	N/A	N/A
1	280	4.72	3.22	2.5	1.46584	37.996	N/A	N/A	N/A
1	280	4.97	2.97	2.2	1.6734	32.474	N/A	N/A	N/A
1	280	5.24	3.04	2.24	1.72368	35.6823	N/A	N/A	N/A
1	280	4.8	2.9	2.14	1.65517	29.7888	N/A	N/A	N/A
1	280	4.81	2.86	2.11	1.68182	29.0264	N/A	N/A	N/A
1	280	4.88	2.9	2.14	1.68276	30.2853	N/A	N/A	N/A
1	280	4.65	3.06	2.28	1.51961	32.4421	N/A	N/A	N/A
1	280	4.97	3.08	2.15	1.61364	32.9113	N/A	N/A	N/A
1	280	5	2.9	2.08	1.72414	30.16	N/A	N/A	N/A
1	280	4.92	2.73	2.35	1.8022	31.5643	N/A	N/A	N/A
1	280	5.14	3.15	2.14	1.63175	34.6487	N/A	N/A	N/A
3	280	4.78	3.27	2.37	1.46177	37.0445	6.77	3.71	3.56	1.8248	89.4155	1.99	0.44	1.19	0.363024	52.3709	0.416318	0.134557	0.50211
3	280	4.81	3.18	2.12	1.51258	32.4271	6.05	3.07	3	1.97068	55.7205	1.24	-0.11	0.88	0.458105	23.2934	0.257796	-0.0345912	0.415094
3	280	5.13	3.06	2.16	1.67647	33.9072	7.27	3.46	3.37	2.10116	84.7697	2.14	0.4	1.21	0.424685	50.8624	0.417154	0.130719	0.560185
3	280	5.2	3.09	2.23	1.68285	35.8316	6.4	4.08	2.98	1.56863	77.8138	1.2	0.99	0.75	-0.11422	41.9821	0.230769	0.320388	0.336323
3	280	5.08	3.11	2.26	1.63344	35.7053	7.27	3.46	2.88	2.10116	72.4441	2.19	0.35	0.62	0.467716	36.7388	0.431102	0.11254	0.274336
3	280	5.45	3.13	2.22	1.74121	37.8699	7.07	3.74	3.3	1.89037	87.2579	1.62	0.61	1.08	0.14916	49.3881	0.297248	0.194888	0.486486
3	280	4.98	3.09	2.12	1.61165	32.623	6.33	3.14	3.14	2.01592	62.4113	1.35	0.05	1.02	0.404273	29.7883	0.271084	0.0161812	0.481132
3	280	5.13	3.16	2.32	1.62342	37.6091	6.18	3.24	2.58	1.90741	51.6599	1.05	0.08	0.26	0.28399	14.0508	0.204678	0.0253165	0.112069
3	280	5.17	2.77	2.08	1.86643	29.7875	6.2	N/A	N/A
3	280	5.29	2.89	2.14	1.83045	32.7165	7.35	N/A	N/A
3	280	5.03	2.81	2.13	1.79004	30.1061	6.49	N/A	N/A
3	280	5.2	2.85	2.14	1.82456	31.7148	7	N/A	N/A
3	280	4.74	2.81	2.13	1.68683	28.3703	7.9	N/A	N/A
3	280	5.06	3.03	2.21	1.66997	33.8833	6.27	N/A	N/A
3	280	4.8	2.75	2.1	1.74545	27.72	6.99	N/A	N/A
3	280	5.05	2.84	2.08	1.77817	29.8314	7	N/A	N/A
3	280	4.88	3.26	2.09	1.49693	33.2494	6.6	N/A	N/A
3	280	5.38	3.17	2.26	1.69716	38.5434	6.46	N/A	N/A
3	280	4.48	2.89	2.2	1.55017	28.4838	6.36	N/A	N/A
3	280	4.81	2.92	2.34	1.64726	32.8658	6.54	N/A	N/A
5	280	4.67	3.18	2.48	1.46855	36.8295	5.63	2.77	2.49	2.03249	38.8318	0.96	-0.41	0.01	0.563938	2.00231	0.205567	-0.128931	0.00403226
5	280	4.84	2.78	2.19	1.74101	29.4669	5.36	3.34	3.59	1.60479	64.2696	0.52	0.56	1.4	-0.136217	34.8027	0.107438	0.201439	0.639269
5	280	4.88	2.69	2.08	1.81413	27.3046	6.64	2.82	2.61	2.35461	48.8717	1.76	0.13	0.53	0.540484	21.5672	0.360656	0.0483271	0.254808
5	280	4.74	2.88	2.12	1.64583	28.9405	5.33	3.19	2.47	1.67085	41.9967	0.59	0.31	0.35	0.0250131	13.0561	0.124473	0.107639	0.165094
5	280	4.94	2.92	2.08	1.69178	30.0036	6.16	3.25	2.86	1.89538	57.2572	1.22	0.33	0.78	0.203604	27.2536	0.246964	0.113014	0.375
5	280	5	2.98	2.04	1.67785	30.396	5.67	2.97	2.45	1.90909	41.2578	0.67	-0.01	0.41	0.231239	10.8618	0.134	-0.0033557	0.20098
5	280	4.86	2.87	2.28	1.69338	31.8019	6.68	2.98	2.83	2.24161	56.3351	1.82	0.11	0.55	0.548231	24.5332	0.374486	0.0383275	0.241228
5	280	4.51	2.62	1.86	1.72137	21.9781	6.52	3.24	2.65	2.01235	55.9807	2.01	0.62	0.79	0.290972	34.0026	0.445676	0.236641	0.424731
5	280	4.82	2.94	2.13	1.63946	30.1838	6.19	2.79	2.41	2.21864	41.6209	1.37	-0.15	0.28	0.579182	11.4371	0.284232	-0.0510204	0.131455
5	280	4.75	2.87	2.09	1.65505	28.4919	5.59	2.76	2.49	2.02536	38.4167	0.84	-0.11	0.4	0.37031	9.92479	0.176842	-0.0383275	0.191388
5	280	5.02	3.03	2.3	1.65677	34.9844	5.56	2.96	3.15	1.87838	51.8414	0.54	-0.07	0.85	0.221613	16.8571	0.10757	-0.0231023	0.369565
5	280	5.52	2.84	2.14	1.94366	33.5484	N/A	N/A	N/A
5	280	4.78	2.83	2.35	1.68905	31.7894	N/A	N/A	N/A
5	280	4.93	3.02	2.27	1.63245	33.7971	N/A	N/A	N/A
5	280	4.85	2.88	2.04	1.68403	28.4947	N/A	N/A	N/A
5	280	5.12	2.94	2.17	1.7415	32.6646	N/A	N/A	N/A
5	280	4.95	2.82	2.11	1.75532	29.4535	N/A	N/A	N/A
5	280	4.97	3.05	2.15	1.62951	32.5908	N/A	N/A	N/A
5	280	4.85	2.75	2.07	1.76364	27.6086	N/A	N/A	N/A
5	280	4.99	3.08	2.18	1.62013	33.5049	N/A	N/A	N/A
1	290	4.84	2.98	2.16	1.62416	31.1541	N/A	N/A	N/A
1	290	4.88	3.07	2.11	1.58958	31.6112	N/A	N/A	N/A
1	290	5.02	2.83	2.14	1.77385	30.4021	N/A	N/A	N/A
1	290	4.78	3.17	4.78	1.50789	72.4294	N/A	N/A	N/A
1	290	5.05	3.02	2.22	1.67219	33.8572	N/A	N/A	N/A
1	290	4.89	3.11	2.14	1.57235	32.5449	N/A	N/A	N/A
1	290	4.97	2.87	2.2	1.73171	31.3806	N/A	N/A	N/A
1	290	5.29	2.97	2.17	1.78114	34.0935	N/A	N/A	N/A
1	290	5.25	2.93	2.09	1.79181	32.1494	N/A	N/A	N/A
1	290	4.47	3.04	2.21	1.47039	30.0312	N/A	N/A	N/A
1	290	4.87	2.9	2.09	1.67931	29.5171	N/A	N/A	N/A
1	290	5.41	3.06	2.26	1.76797	37.4134	N/A	N/A	N/A
1	290	4.65	2.82	2.05	1.64894	26.8816	N/A	N/A	N/A
1	290	4.97	3.17	2.19	1.56782	34.5032	N/A	N/A	N/A
1	290	4.97	2.81	2.08	1.76868	29.0487	N/A	N/A	N/A
1	290	5.29	3.05	2.09	1.73443	33.7211	N/A	N/A	N/A
1	290	4.69	2.8	2.1	1.675	27.5772	N/A	N/A	N/A
1	290	4.75	2.95	1.95	1.61017	27.3244	N/A	N/A	N/A
1	290	5.1	2.94	2.16	1.73469	32.387	N/A	N/A	N/A
1	290	4.75	2.67	2.01	1.77903	25.4918	N/A	N/A	N/A
3	290	5.06	3.11	2.35	1.62701	36.981	5.92	3.63	2.9	1.63085	62.3198	0.86	0.52	0.55	0.00384435	25.3388	0.16996	0.167203	0.234043
3	290	5.14	3.25	2.19	1.58154	36.5839	7.22	3.35	3.01	2.15522	72.8029	2.08	0.1	0.82	0.573685	36.2189	0.404669	0.0307692	0.374429
3	290	5.01	3.14	2.38	1.59554	37.4407	5.56	3.32	3.28	1.6747	60.5462	0.55	0.18	0.9	0.0791574	23.1054	0.10978	0.0573248	0.378151
3	290	5.24	2.99	2.43	1.75251	38.0723	7.33	3.55	2.73	2.06479	71.0387	2.09	0.56	0.3	0.31228	32.9664	0.398855	0.187291	0.123457
3	290	4.89	2.98	2.29	1.64094	33.3703	7.23	3.8	3.62	1.90263	99.4559	2.34	0.82	1.33	0.261692	66.0855	0.478528	0.275168	0.580786
3	290	5.26	3.15	2.1	1.66984	34.7949	6.84	3.99	3.58	1.71429	97.7039	1.58	0.84	1.48	0.0444444	62.909	0.30038	0.266667	0.704762
3	290	5.31	3.07	2.17	1.72964	35.3747	6.49	3.32	3.32	1.95482	71.5354	1.18	0.25	1.15	0.225178	36.1607	0.222222	0.0814332	0.529954
3	290	5.17	2.96	2.23	1.74662	34.1261	6.65	3.22	3.83	2.06522	82.0118	1.48	0.26	1.6	0.318596	47.8857	0.286267	0.0878378	0.717489
3	290	5.41	3	2.17	1.80333	35.2191	7.15	3.07	3.51	2.32899	77.0463	1.74	0.07	1.34	0.525657	41.8272	0.321627	0.0233333	0.617512
3	290	5.35	2.96	2.46	1.80743	38.9566	7.86	N/A	N/A			2.51
3	290	5.15	3.24	2.1	1.58951	35.0406	6.7	N/A	N/A			1.55
3	290	5.37	3.23	2.29	1.66254	39.7203	7.37	N/A	N/A			2
3	290	5.23	3.16	2.19	1.65506	36.1937	6.96	N/A	N/A			1.73
3	290	5.2	2.98	2.35	1.74497	36.4156	6.39	N/A	N/A			1.19
3	290	5.19	2.95	2.2	1.75932	33.6831	6.21	N/A	N/A			1.02
3	290	5.32	3.25	2.51	1.63692	43.3979	6.58	N/A	N/A			1.26
3	290	5.15	3.18	2.44	1.6195	39.9599	6.76	N/A	N/A			1.61
3	290	5.06	3.15	2.44	1.60635	38.8912	6.67	N/A	N/A			1.61
3	290	5.2	2.76	2.45	1.88406	35.1624	6.79	N/A	N/A			1.59
3	290	5.1	2.98	2.37	1.71141	36.0193	N/A	N/A	N/A
5	290	5.06	3.05	2.14	1.65902	33.0266	N/A	N/A	N/A
5	290	4.53	2.02	3.13	2.24257	28.6414	N/A	N/A	N/A
5	290	4.74	2.93	2.01	1.61775	27.9153	N/A	N/A	N/A
5	290	4.64	2.8	2.11	1.65714	27.4131	N/A	N/A	N/A
5	290	4.97	2.95	1.98	1.68475	29.0298	N/A	N/A	N/A
5	290	4.59	2.79	2.13	1.64516	27.277	N/A	N/A	N/A
5	290	4.77	2.85	2.01	1.67368	27.3249	N/A	N/A	N/A
5	290	4.69	3.05	1.99	1.5377	28.466	N/A	N/A	N/A
5	290	4.98	3.05	2.05	1.63279	31.1374	N/A	N/A	N/A
5	290	4.83	3.05	2.08	1.58361	30.6415	N/A	N/A	N/A
5	290	4.84	2.55	2.02	1.89804	24.9308	N/A	N/A	N/A
5	290	4.89	2.79	2.03	1.75269	27.6955	N/A	N/A	N/A
5	290	5.07	3.03	2.07	1.67327	31.7995	N/A	N/A	N/A
5	290	4.47	2.88	2.01	1.55208	25.8759	N/A	N/A	N/A
5	290	4.47	2.71	1.95	1.64945	23.6217	N/A	N/A	N/A
5	290	4.88	2.98	2.05	1.63758	29.8119	N/A	N/A	N/A
5	290	5	3.07	2.1	1.62866	32.235	N/A	N/A	N/A
5	290	4.87	2.83	2.05	1.72085	28.2533	N/A	N/A	N/A
5	290	4.92	2.99	2.06	1.64548	30.3042	N/A	N/A	N/A
5	290	4.94	2.89	2.22	1.70934	31.6941	N/A	N/A	N/A
1	300	5.06	2.78	2.25	1.82014	31.6503	N/A	N/A	N/A
1	300	5.11	2.92	2.25	1.75	33.5727	N/A	N/A	N/A
1	300	5.05	2.9	2.22	1.74138	32.5119	N/A	N/A	N/A
1	300	5.21	3.13	2.37	1.66454	38.6483	N/A	N/A	N/A
1	300	4.71	2.97	2.1	1.58586	29.3763	N/A	N/A	N/A
1	300	4.76	2.86	2.08	1.66434	28.3163	N/A	N/A	N/A
1	300	4.77	2.91	2.13	1.63918	29.5659	N/A	N/A	N/A
1	300	4.89	3.06	2.14	1.59804	32.0217	N/A	N/A	N/A
1	300	5.13	3.06	2.25	1.67647	35.32	N/A	N/A	N/A
1	300	5.08	2.98	2.13	1.7047	32.2448	N/A	N/A	N/A
1	300	4.98	3.02	2.18	1.64901	32.7863	N/A	N/A	N/A
1	300	4.67	2.99	2.27	1.56187	31.6967	N/A	N/A	N/A
1	300	4.88	3.08	2.11	1.58442	31.7141	N/A	N/A	N/A
1	300	4.97	3.04	2.21	1.63487	33.3904	N/A	N/A	N/A
1	300	4.93	2.87	2.33	1.71777	32.9674	N/A	N/A	N/A
1	300	5.09	2.84	2.36	1.79225	34.1152	N/A	N/A	N/A
1	300	4.98	2.85	2.22	1.74737	31.5085	N/A	N/A	N/A
1	300	4.77	3.16	2.12	1.50949	31.9552	N/A	N/A	N/A
1	300	4.89	2.9	2.08	1.68621	29.4965	N/A	N/A	N/A
1	300	5	2.85	1.97	1.75439	28.0725	N/A	N/A	N/A
3	300	5.2	2.85	2.36	1.82456	34.9752	6.88	3.6	3.05	1.91111	75.5424	1.68	0.75	0.69	0.0865497	40.5672	0.323077	0.263158	0.292373
3	300	5.02	3	2.09	1.67333	31.4754	7.32	N/A	N/A
3	300	5.04	3	2.2	1.68	33.264	6.56	N/A	N/A
3	300	4.74	3.03	2.17	1.56436	31.166	7.4	N/A	N/A
3	300	4.93	2.94	2.11	1.67687	30.5828	7.29	N/A	N/A
3	300	4.86	2.93	2.13	1.6587	30.3308	7.96	N/A	N/A
3	300	5.07	3.08	2.15	1.6461	33.5735	6.94	N/A	N/A
3	300	5.1	2.76	2.12	1.84783	29.8411	6.41	N/A	N/A
3	300	5.27	2.92	2.08	1.80479	32.0079	N/A	N/A	N/A
3	300	4.79	3.12	2.25	1.53526	33.6258	N/A	N/A	N/A
3	300	4.87	2.92	2.14	1.66781	30.4317	N/A	N/A	N/A
3	300	4.99	3.25	2.6	1.53538	42.1655	N/A	N/A	N/A
3	300	5.08	2.84	2.31	1.78873	33.3268	N/A	N/A	N/A
3	300	5.08	3.01	2.14	1.68771	32.7223	N/A	N/A	N/A
3	300	4.96	2.83	2.18	1.75265	30.6002	N/A	N/A	N/A
3	300	5.04	3.14	2.09	1.6051	33.0755	N/A	N/A	N/A
3	300	5.19	3.13	2.12	1.65815	34.4388	N/A	N/A	N/A
3	300	4.89	2.98	2.07	1.64094	30.1645	N/A	N/A	N/A
3	300	5.04	2.98	2.11	1.69128	31.6905	N/A	N/A	N/A
3	300	4.86	3.03	2.16	1.60396	31.8077	N/A	N/A	N/A
5	300	4.79	2.83	2.04	1.69258	27.6536	N/A	N/A	N/A
5	300	4.85	2.77	1.96	1.7509	26.3316	N/A	N/A	N/A
5	300	5.07	2.98	2	1.70134	30.2172	N/A	N/A	N/A
5	300	4.7	2.84	2.07	1.65493	27.6304	N/A	N/A	N/A
5	300	4.91	2.95	2.23	1.66441	32.3004	N/A	N/A	N/A
5	300	4.3	2.73	1.94	1.57509	22.7737	N/A	N/A	N/A
5	300	4.73	2.9	1.95	1.63103	26.7481	N/A	N/A	N/A
5	300	4.29	2.8	1.86	1.53214	22.3423	N/A	N/A	N/A
5	300	4.57	2.47	1.88	1.8502	21.2213	N/A	N/A	N/A
5	300	4.45	2.72	2.01	1.63603	24.329	N/A	N/A	N/A
5	300	4.56	2.78	2.11	1.64029	26.748	N/A	N/A	N/A
5	300	4.53	2.54	2.1	1.78346	24.163	N/A	N/A	N/A
5	300	5.1	2.91	2.1	1.75258	31.1661	N/A	N/A	N/A
5	300	4.33	2.92	1.85	1.48288	23.3907	N/A	N/A	N/A
5	300	4.83	3.01	2.14	1.60465	31.112	N/A	N/A	N/A
5	300	4.72	2.81	2.02	1.67972	26.7917	N/A	N/A	N/A
5	300	5.17	2.58	1.96	2.00388	26.1437	N/A	N/A	N/A
5	300	4.76	2.9	2.03	1.64138	28.0221	N/A	N/A	N/A
5	300	5.1	3.01	2.11	1.69435	32.3906	N/A	N/A	N/A
5	300	4.35	2.76	1.89	1.57609	22.6913	N/A	N/A	N/A

## Sheet: Wheat
Time (h)	Temperature (℃)	Before Carbonization					After Carbonization
		Length (mm)	Width (mm)	Thickness (mm)	L/W ratio	Volume (mm³)	Length (mm)	Width (mm)	Thickness (mm)	L/W ratio	Volume (mm³)	Length variation	Width variation	Thickness variation	L/W ratio variation	Volume variation	Shrinkage of length	Shrinkage of Width	Shrinkage of Thickness
1	240	6.97	3.69	3.43	1.88889	88.2172	6.9	4.19	4.04	1.64678	116.8	-0.07	0.5	0.61	-0.242111	28.5832	-0.010043	0.135501	0.177843
1	240	5.98	3.15	3.14	1.89841	59.1482	6.53	3.96	3.75	1.64899	96.9705	0.55	0.81	0.61	-0.249423	37.8223	0.0919732	0.257143	0.194268
1	240	6.82	3.18	3	2.14465	65.0628	6.88	4.55	3.82	1.51209	119.581	0.06	1.37	0.82	-0.632566	54.5185	0.00879765	0.430818	0.273333
1	240	7.24	3.67	3.53	1.97275	93.7949	6.6	3.81	3.39	1.73228	85.2449	-0.64	0.14	-0.14	-0.240469	-8.54998	-0.0883978	0.0381471	-0.0396601
1	240	6.56	3.53	3.42	1.85836	79.1963	6.81	4.09	3.64	1.66504	101.385	0.25	0.56	0.22	-0.19332	22.1883	0.0381098	0.15864	0.0643275
1	240	6.06	3.47	2.89	1.7464	60.7715	7.25	4.08	3.46	1.77696	102.347	1.19	0.61	0.57	0.0305631	41.5753	0.19637	0.175793	0.197232
1	240	6.09	3.3	2.97	1.84545	59.6881	7.01	4.23	3.64	1.65721	107.934	0.92	0.93	0.67	-0.188244	48.2463	0.151067	0.281818	0.225589
1	240	6.15	3.26	3.39	1.8865	67.9661	6.47	3.96	3.51	1.63384	89.9304	0.32	0.7	0.12	-0.252665	21.9643	0.0520325	0.214724	0.0353982
1	240	6.54	3.2	2.88	2.04375	60.2726	6.68	4.29	3.63	1.55711	104.026	0.14	1.09	0.75	-0.48664	43.753	0.0214067	0.340625	0.260417
1	240	5.56	2.8	3.05	1.98571	47.4824	6.28	3.55	2.93	1.76901	65.3214	0.72	0.75	-0.12	-0.2167	17.839	0.129496	0.267857	-0.0393443
1	240	7.65	3.84	3.58	1.99219	105.166	6.41	3.84	3.51	1.66927	86.3965	-1.24	0	-0.07	-0.322917	-18.7695	-0.162092	0	-0.0195531
1	240	7.02	3.82	3.61	1.8377	96.8072	6.5	3.54	3.02	1.83616	69.4902	-0.52	-0.28	-0.59	-0.00153814	-27.317	-0.0740741	-0.0732984	-0.163435
1	240	6.14	3.4	3.2	1.80588	66.8032	6.57	3.92	3.49	1.67602	89.8829	0.43	0.52	0.29	-0.129862	23.0797	0.0700326	0.152941	0.090625
1	240	7.1	3.77	3.43	1.88329	91.8108	5.81	3.73	3.14	1.55764	68.0479	-1.29	-0.04	-0.29	-0.325648	-23.7629	-0.18169	-0.0106101	-0.0845481
1	240	6.66	3.52	3.33	1.89205	78.0659	6.14	3.66	3.14	1.6776	70.5633	-0.52	0.14	-0.19	-0.21445	-7.50252	-0.0780781	0.0397727	-0.0570571
1	240	6.9	3.65	3.48	1.89041	87.6438	6.35	3.26	3.38	1.94785	69.9694	-0.55	-0.39	-0.1	0.0574418	-17.6744	-0.0797101	-0.106849	-0.0287356
1	240	6.75	3.33	3.14	2.02703	70.5794	5.92	3.54	2.91	1.67232	60.9843	-0.83	0.21	-0.23	-0.354711	-9.59506	-0.122963	0.0630631	-0.0732484
1	240	5.73	3.38	2.99	1.69527	57.9085	5.92	3.61	2.98	1.63989	63.6862	0.19	0.23	-0.01	-0.0553771	5.77765	0.0331588	0.0680473	-0.00334448
1	240	7.21	3.91	4.13	1.84399	116.429	5.91	3.26	2.99	1.81288	57.6071	-1.3	-0.65	-1.14	-0.0311063	-58.8221	-0.180305	-0.16624	-0.276029
1	240	7.15	3.83	3.5	1.86684	95.8458	5.4	3.31	3.11	1.63142	55.5881	-1.75	-0.52	-0.39	-0.235421	-40.2576	-0.244755	-0.13577	-0.111429
3	240	6.64	3.85	3.75	1.72468	95.865	6.87	4.47	3.73	1.53691	114.544	0.23	0.62	-0.02	-0.187763	18.6792	0.0346386	0.161039	-0.00533333
3	240	6.65	3.55	3.47	1.87324	81.918	6.2	3.98	3.85	1.55779	95.0026	-0.45	0.43	0.38	-0.31545	13.0846	-0.0676692	0.121127	0.10951
3	240	6.83	3.68	3.41	1.85598	85.7083	6.62	4.09	3.58	1.61858	96.9314	-0.21	0.41	0.17	-0.237396	11.2231	-0.0307467	0.111413	0.0498534
3	240	6.6	3.49	3.14	1.89112	72.3268	7.07	3.69	3.29	1.91599	85.8305	0.47	0.2	0.15	0.0248717	13.5037	0.0712121	0.0573066	0.0477707
3	240	6.91	3.41	3	2.02639	70.6893	6.46	3.78	3.6	1.70899	87.9077	-0.45	0.37	0.6	-0.317398	17.2184	-0.065123	0.108504	0.2
3	240	7.16	3.93	3.72	1.82188	104.676	6.17	3.73	3.39	1.65416	78.0178	-0.99	-0.2	-0.33	-0.167727	-26.6585	-0.138268	-0.0508906	-0.0887097
3	240	6.79	3.76	3.69	1.80585	94.2072	6.49	3.72	3.29	1.74462	79.4298	-0.3	-0.04	-0.4	-0.0612274	-14.7774	-0.0441826	-0.0106383	-0.108401
3	240	6.98	3.29	3.05	2.12158	70.0408	5.89	3.61	3.42	1.63158	72.7191	-1.09	0.32	0.37	-0.490002	2.67831	-0.15616	0.0972644	0.121311
3	240	6.21	3.46	3.18	1.7948	68.3274	6.59	3.85	3.66	1.71169	92.8597	0.38	0.39	0.48	-0.0831094	24.5323	0.0611916	0.112717	0.150943
3	240	6.89	3.63	3.6	1.89807	90.0385	5.81	3.34	3.01	1.73952	58.4103	-1.08	-0.29	-0.59	-0.158551	-31.6283	-0.156749	-0.0798898	-0.163889
3	240	6.31	3.43	3.22	1.83965	69.6914	6.58	3.71	3.08	1.77358	75.1883	0.27	0.28	-0.14	-0.0660652	5.49692	0.0427892	0.0816327	-0.0434783
3	240	6.78	3.29	3.26	2.06079	72.7182	5.94	3.28	3.21	1.81098	62.5411	-0.84	-0.01	-0.05	-0.249815	-10.1771	-0.123894	-0.00303951	-0.0153374
3	240	6.95	3.6	3.22	1.93056	80.5644	6.67	4.22	3.44	1.58057	96.8271	-0.28	0.62	0.22	-0.349987	16.2627	-0.0402878	0.172222	0.068323
3	240	5.94	3.14	2.78	1.89172	51.8514	6.49	4.02	3.46	1.61443	90.2707	0.55	0.88	0.68	-0.277292	38.4193	0.0925926	0.280255	0.244604
3	240	6.81	3.56	3.36	1.91292	81.4585	6.06	3.9	3.53	1.55385	83.428	-0.75	0.34	0.17	-0.359075	1.96952	-0.110132	0.0955056	0.0505952
3	240	6.57	3.37	3.18	1.94955	70.4081	6.55	4.03	3.51	1.62531	92.6517	-0.02	0.66	0.33	-0.324245	22.2437	-0.00304414	0.195846	0.103774
3	240	7.21	3.93	3.38	1.83461	95.7733	6.44	3.57	3.5	1.80392	80.4678	-0.77	-0.36	0.12	-0.030684	-15.3055	-0.106796	-0.0916031	0.035503
3	240	6.16	3.14	3.1	1.96178	59.9614	6.64	4.21	3.59	1.5772	100.356	0.48	1.07	0.49	-0.384586	40.3949	0.0779221	0.340764	0.158065
3	240	6.6	3.31	3.36	1.99396	73.4026	6.37	3.58	3.33	1.77933	75.9393	-0.23	0.27	-0.03	-0.214628	2.53676	-0.0348485	0.081571	-0.00892857
3	240	7.14	3.47	3.21	2.05764	79.5303	6.07	3.65	3.37	1.66301	74.664	-1.07	0.18	0.16	-0.394623	-4.86628	-0.14986	0.0518732	0.0498442
5	240	6.82	3.39	3.32	2.0118	76.7577	5.77	4.8	3.89	1.20208	107.737	-1.05	1.41	0.57	-0.809716	30.9797	-0.153959	0.415929	0.171687
5	240	6.26	3.44	2.99	1.81977	64.3879	6.02	4.32	3.76	1.39352	97.7841	-0.24	0.88	0.77	-0.426249	33.3962	-0.0383387	0.255814	0.257525
5	240	6.9	3.73	3.4	1.84987	87.5058	6.03	4.19	3.73	1.43914	94.2411	-0.87	0.46	0.33	-0.410725	6.73526	-0.126087	0.123324	0.0970588
5	240	6.35	3.63	3.31	1.74931	76.2972	5.84	4.53	3.65	1.28918	96.5615	-0.51	0.9	0.34	-0.460128	20.2643	-0.080315	0.247934	0.102719
5	240	7.33	3.57	3.52	2.05322	92.1117	5.94	4.57	3.59	1.29978	97.4534	-1.39	1	0.07	-0.75344	5.34171	-0.189632	0.280112	0.0198864
5	240	6.88	3.51	3.38	1.96011	81.6229	4.94	3.67	3.26	1.34605	59.1031	-1.94	0.16	-0.12	-0.614065	-22.5198	-0.281977	0.045584	-0.035503
5	240	6.35	3.62	3.25	1.75414	74.7077	5.8	4.24	3.46	1.36792	85.0883	-0.55	0.62	0.21	-0.386219	10.3806	-0.0866142	0.171271	0.0646154
5	240	5.65	3.29	2.93	1.71733	54.4643	6.06	4.39	3.72	1.38041	98.9646	0.41	1.1	0.79	-0.336915	44.5003	0.0725664	0.334347	0.269625
5	240	7.15	3.95	3.52	1.81013	99.4136	6.09	4	3.35	1.5225	81.606	-1.06	0.05	-0.17	-0.287627	-17.8076	-0.148252	0.0126582	-0.0482955
5	240	5.96	3.21	3.01	1.8567	57.5861	6.13	4.17	3.36	1.47002	85.8887	0.17	0.96	0.35	-0.386674	28.3025	0.0285235	0.299065	0.116279
5	240	6.41	3.69	3.36	1.73713	79.4737	5.39	4.43	3.4	1.2167	81.1842	-1.02	0.74	0.04	-0.520423	1.71044	-0.159126	0.200542	0.0119048
5	240	5.71	3.46	3.23	1.65029	63.8138	5.48	4.38	3.56	1.25114	85.4485	-0.23	0.92	0.33	-0.399147	21.6347	-0.0402802	0.265896	0.102167
5	240	5.16	2.49	2.57	2.07229	33.0204	5.54	4.21	3.49	1.31591	81.3987	0.38	1.72	0.92	-0.756375	48.3783	0.0736434	0.690763	0.357977
5	240	7.25	3.52	3.36	2.05966	85.7472	6.17	4.38	3.6	1.40868	97.2886	-1.08	0.86	0.24	-0.650983	11.5414	-0.148966	0.244318	0.0714286
5	240	6.77	3.63	3.41	1.86501	83.8011	5.33	3.9	3.25	1.36667	67.5577	-1.44	0.27	-0.16	-0.498347	-16.2433	-0.212703	0.0743802	-0.0469208
5	240	6.89	3.58	3.03	1.92458	74.7386	5.6	3.88	3.3	1.4433	71.7024	-1.29	0.3	0.27	-0.481282	-3.03619	-0.187228	0.0837989	0.0891089
5	240	5.81	3.07	2.96	1.89251	52.7966	5.74	3.5	3.03	1.64	60.8727	-0.07	0.43	0.07	-0.252508	8.07607	-0.0120482	0.140065	0.0236486
5	240	6.65	3.85	3.42	1.72727	87.5606	4.52	2.71	2.68	1.6679	32.8279	-2.13	-1.14	-0.74	-0.059376	-54.7327	-0.320301	-0.296104	-0.216374
5	240	7.19	3.79	3.6	1.8971	98.1004	5.14	3.55	3.07	1.44789	56.0183	-2.05	-0.24	-0.53	-0.44921	-42.0821	-0.285118	-0.0633245	-0.147222
5	240	6.42	3.15	3.04	2.0381	61.4779	5.34	3.63	3.11	1.47107	60.2849	-1.08	0.48	0.07	-0.567021	-1.19306	-0.168224	0.152381	0.0230263
1	250	7.02	3.91	3.3	1.7954	90.5791	6.42	4.2	3.58	1.52857	96.5311	-0.6	0.29	0.28	-0.266825	5.95206	-0.0854701	0.0741688	0.0848485
1	250	6.02	3.36	2.9	1.79167	58.6589	6.32	4.66	3.44	1.35622	101.312	0.3	1.3	0.54	-0.435443	42.6532	0.0498339	0.386905	0.186207
1	250	6.91	3.65	3.56	1.89315	89.7885	6.56	3.92	3.26	1.67347	83.8316	-0.35	0.27	-0.3	-0.219681	-5.95699	-0.0506512	0.0739726	-0.0842697
1	250	6.9	3.71	3.26	1.85984	83.4527	6.8	3.92	3.61	1.73469	96.2282	-0.1	0.21	0.35	-0.125144	12.7754	-0.0144928	0.0566038	0.107362
1	250	6.66	3.68	3.41	1.80978	83.575	6.96	4.34	3.65	1.60369	110.253	0.3	0.66	0.24	-0.206096	26.6784	0.045045	0.179348	0.0703812
1	250	6.56	3.2	2.93	2.05	61.5066	5.68	3.56	2.95	1.59551	59.6514	-0.88	0.36	0.02	-0.454494	-1.8552	-0.134146	0.1125	0.00682594
1	250	7.12	3.68	3.74	1.93478	97.994	6.49	4.42	3.67	1.46833	105.277	-0.63	0.74	-0.07	-0.466457	7.2829	-0.0884831	0.201087	-0.0187166
1	250	7.33	3.88	3.44	1.88918	97.835	6.74	4.29	4.06	1.5711	117.393	-0.59	0.41	0.62	-0.31808	19.5583	-0.0804911	0.10567	0.180233
1	250	7.35	3.89	3.56	1.88946	101.786	6.86	4.14	3.44	1.657	97.6974	-0.49	0.25	-0.12	-0.232455	-4.08836	-0.0666667	0.0642674	-0.0337079
1	250	6.58	3.71	3.62	1.77358	88.3707	6.22	3.75	2.93	1.65867	68.3423	-0.36	0.04	-0.69	-0.114918	-20.0285	-0.0547112	0.0107817	-0.190608
1	250	6.73	3.6	3.47	1.86944	84.0712	5.66	4	3.45	1.415	78.108	-1.07	0.4	-0.02	-0.454444	-5.96316	-0.15899	0.111111	-0.00576369
1	250	7.08	3.76	3.64	1.88298	96.8997	5.67	3.75	3.06	1.512	65.0632	-1.41	-0.01	-0.58	-0.370979	-31.8365	-0.199153	-0.00265957	-0.159341
1	250	7.09	3.57	3.38	1.98599	85.5522	6.09	4.33	3.46	1.40647	91.2392	-1	0.76	0.08	-0.579528	5.68697	-0.141044	0.212885	0.0236686
1	250	6.38	3.52	3.32	1.8125	74.5592	6.42	4.32	3.42	1.48611	94.8516	0.04	0.8	0.1	-0.326389	20.2924	0.00626959	0.227273	0.0301205
1	250	6.08	3.5	3.03	1.73714	64.4784	5.86	4.66	3.71	1.25751	101.311	-0.22	1.16	0.68	-0.479632	36.8328	-0.0361842	0.331429	0.224422
1	250	6.61	3.41	3.31	1.93842	74.6077	6.05	3.82	3.54	1.58377	81.8129	-0.56	0.41	0.23	-0.354647	7.20521	-0.0847201	0.120235	0.0694864
1	250	6.61	3.05	3.23	2.16721	65.1184	5.85	4.01	3.1	1.45885	72.7213	-0.76	0.96	-0.13	-0.70836	7.60293	-0.114977	0.314754	-0.0402477
1	250	6.56	3.45	3.36	1.90145	76.0435	6.61	3.87	3.65	1.70801	93.3696	0.05	0.42	0.29	-0.193439	17.326	0.00762195	0.121739	0.0863095
1	250	6.9	3.67	3.7	1.88011	93.6951	6.34	3.61	3.05	1.75623	69.8066	-0.56	-0.06	-0.65	-0.123876	-23.8885	-0.0811594	-0.0163488	-0.175676
1	250	6.18	3.47	3.37	1.78098	72.2683	6.67	4.09	3.89	1.63081	106.12	0.49	0.62	0.52	-0.150173	33.8521	0.079288	0.178674	0.154303
3	250	6.87	3.86	3.4	1.77979	90.1619	6.29	4.42	3.73	1.42308	103.701	-0.58	0.56	0.33	-0.356716	13.5388	-0.084425	0.145078	0.0970588
3	250	6.81	3.6	3.34	1.89167	81.8834	6.21	4.45	3.83	1.39551	105.84	-0.6	0.85	0.49	-0.496161	23.9567	-0.0881057	0.236111	0.146707
3	250	6.9	3.45	3.16	2	75.2238	6.06	4.75	4.03	1.27579	116.004	-0.84	1.3	0.87	-0.724211	40.7797	-0.121739	0.376812	0.275316
3	250	6.46	3.46	2.94	1.86705	65.7137	6.08	4.84	3.77	1.2562	110.941	-0.38	1.38	0.83	-0.610854	45.2268	-0.0588235	0.398844	0.282313
3	250	6.94	3.58	3.02	1.93855	75.0325	6.07	4.94	3.37	1.22874	101.052	-0.87	1.36	0.35	-0.709803	26.0196	-0.12536	0.379888	0.115894
3	250	6.94	3.78	3.33	1.83598	87.3566	5.98	4.07	3.36	1.46929	81.7777	-0.96	0.29	0.03	-0.366691	-5.57886	-0.138329	0.0767196	0.00900901
3	250	6.38	3.35	3.13	1.90448	66.8975	5.54	4.51	3.63	1.22838	90.697	-0.84	1.16	0.5	-0.676096	23.7995	-0.131661	0.346269	0.159744
3	250	6.74	3.42	3.26	1.97076	75.1456	6.1	4.32	3.3	1.41204	86.9616	-0.64	0.9	0.04	-0.558723	11.816	-0.0949555	0.263158	0.0122699
3	250	6.39	3.45	3.48	1.85217	76.7183	6.04	4.08	3.4	1.48039	83.7869	-0.35	0.63	-0.08	-0.371782	7.06854	-0.0547731	0.182609	-0.0229885
3	250	6.86	3.43	3.78	2	88.9426	5.57	3.84	3.14	1.45052	67.1608	-1.29	0.41	-0.64	-0.549479	-21.7818	-0.188047	0.119534	-0.169312
3	250	6.8	3.57	3.36	1.90476	81.5674	6.08	4.41	3.83	1.37868	102.693	-0.72	0.84	0.47	-0.526077	21.1257	-0.105882	0.235294	0.139881
3	250	6.38	3.31	3.01	1.92749	63.5646	5.98	4.03	3.94	1.48387	94.9516	-0.4	0.72	0.93	-0.443621	31.3871	-0.0626959	0.217523	0.30897
3	250	7.01	3.82	3.49	1.83508	93.4559	5.66	3.95	3.55	1.43291	79.3674	-1.35	0.13	0.06	-0.402167	-14.0886	-0.192582	0.0340314	0.017192
3	250	7.22	3.56	3.38	2.02809	86.8768	6.24	4.11	3.67	1.51825	94.1223	-0.98	0.55	0.29	-0.509842	7.24547	-0.135734	0.154494	0.0857988
3	250	6.3	3.29	2.97	1.91489	61.5592	5.97	4.07	3.59	1.46683	87.2295	-0.33	0.78	0.62	-0.448063	25.6703	-0.052381	0.237082	0.208754
3	250	6.82	3.7	3.43	1.84324	86.5526	5.86	3.88	3.12	1.51031	70.9388	-0.96	0.18	-0.31	-0.332934	-15.6138	-0.140762	0.0486486	-0.090379
3	250	6.07	3.04	2.62	1.99671	48.3463	5.73	4.79	3.78	1.19624	103.749	-0.34	1.75	1.16	-0.800468	55.4022	-0.0560132	0.575658	0.442748
3	250	7.39	3.63	3.51	2.03581	94.1582	5.99	4.43	3.67	1.35214	97.386	-1.4	0.8	0.16	-0.683668	3.22781	-0.189445	0.220386	0.045584
3	250	6.79	3.86	3.39	1.75907	88.8499	5.46	3.72	3.16	1.46774	64.1834	-1.33	-0.14	-0.23	-0.291325	-24.6665	-0.195876	-0.0362694	-0.0678466
3	250	7.28	3.45	3.6	2.11014	90.4176	5.52	4.09	3.44	1.34963	77.6642	-1.76	0.64	-0.16	-0.760512	-12.7534	-0.241758	0.185507	-0.0444444
5	250	7.22	3.76	3.57	1.92021	96.9155	5.05	3.99	3.46	1.26566	69.7173	-2.17	0.23	-0.11	-0.654549	-27.1982	-0.300554	0.0611702	-0.0308123
5	250	7.06	3.72	3.52	1.89785	92.4465	5.76	4.34	3.68	1.32719	91.9941	-1.3	0.62	0.16	-0.570661	-0.452352	-0.184136	0.166667	0.0454545
5	250	6.67	3.94	3.41	1.69289	89.6141	5.91	4.2	3.72	1.40714	92.3378	-0.76	0.26	0.31	-0.285751	2.72372	-0.113943	0.0659898	0.0909091
5	250	6.52	3.57	3.15	1.82633	73.3207	6.2	4.03	3.58	1.53846	89.4499	-0.32	0.46	0.43	-0.287869	16.1292	-0.0490798	0.128852	0.136508
5	250	6.24	3.52	3.32	1.77273	72.9231	5.73	4.48	3.59	1.27902	92.1567	-0.51	0.96	0.27	-0.493709	19.2336	-0.0817308	0.272727	0.0813253
5	250	6.62	3.58	3.37	1.84916	79.8677	6.03	4.19	3.33	1.43914	84.1348	-0.59	0.61	-0.04	-0.410021	4.26713	-0.0891239	0.170391	-0.0118694
5	250	6.41	3.62	3.27	1.77072	75.8777	5.47	4.54	3.79	1.20485	94.1201	-0.94	0.92	0.52	-0.565872	18.2424	-0.146646	0.254144	0.159021
5	250	6.63	3.73	3.05	1.77748	75.4262	5.74	4.89	3.99	1.17382	111.994	-0.89	1.16	0.94	-0.603656	36.5675	-0.134238	0.310992	0.308197
5	250	6.43	3.58	3.58	1.79609	82.4095	5.89	4.6	3.69	1.28043	99.9769	-0.54	1.02	0.11	-0.515655	17.5674	-0.0839813	0.284916	0.0307263
5	250	7.04	3.77	3.68	1.86737	97.6701	5.05	3.55	2.88	1.42254	51.6312	-1.99	-0.22	-0.8	-0.444839	-46.0389	-0.28267	-0.0583554	-0.217391
5	250	7.37	3.65	3.64	2.01918	97.9178	5.27	4.29	3.5	1.22844	79.1291	-2.1	0.64	-0.14	-0.79074	-18.7888	-0.284939	0.175342	-0.0384615
5	250	7.01	3.77	3.38	1.85942	89.3256	5.12	4.4	3.68	1.16364	82.903	-1.89	0.63	0.3	-0.69578	-6.42259	-0.269615	0.167109	0.0887574
5	250	6.7	3.64	3.19	1.84066	77.7977	5.41	4.27	3.65	1.26698	84.3176	-1.29	0.63	0.46	-0.57368	6.51984	-0.192537	0.173077	0.144201
5	250	6.81	3.48	3.44	1.9569	81.5239	5.26	4.3	3.54	1.22326	80.0677	-1.55	0.82	0.1	-0.733641	-1.45615	-0.227606	0.235632	0.0290698
5	250	6.05	3.35	3.08	1.80597	62.4239	5.05	3.75	3.29	1.34667	62.3044	-1	0.4	0.21	-0.459303	-0.119525	-0.165289	0.119403	0.0681818
5	250	6.61	3.88	3.45	1.70361	88.4815	5.08	4.77	3.76	1.06499	91.1108	-1.53	0.89	0.31	-0.638619	2.62936	-0.231467	0.229381	0.0898551
5	250	5.96	3.05	2.77	1.9541	50.3531	5.26	4.26	3.27	1.23474	73.2729	-0.7	1.21	0.5	-0.719357	22.9198	-0.11745	0.396721	0.180505
5	250	5.91	3.31	2.91	1.7855	56.9257	5.64	4.43	3.58	1.27314	89.447	-0.27	1.12	0.67	-0.512361	32.5213	-0.0456853	0.338369	0.230241
5	250	6.6	3.77	3.54	1.75066	88.0823	5.37	4.24	3.5	1.26651	79.6908	-1.23	0.47	-0.04	-0.484154	-8.39148	-0.186364	0.124668	-0.0112994
5	250	6.6	3.21	3.07	2.05607	65.041	5.52	3.75	3.15	1.472	65.205	-1.08	0.54	0.08	-0.584075	0.16398	-0.163636	0.168224	0.0260586
1	260	6.64	3.6	3.28	1.84444	78.4051	6.37	4.69	4.01	1.35821	119.8	-0.27	1.09	0.73	-0.486235	41.3948	-0.0406627	0.302778	0.222561
1	260	4.75	3.88	3.51	1.22423	64.6893	6.57	4.02	3.43	1.63433	90.5911	1.82	0.14	-0.08	0.410102	25.9018	0.383158	0.0360825	-0.022792
1	260	6.98	3.98	3.48	1.75377	96.6758	5.72	4.3	3.67	1.33023	90.2673	-1.26	0.32	0.19	-0.423536	-6.40847	-0.180516	0.080402	0.0545977
1	260	6.15	3.53	3.51	1.74221	76.2003	6.2	3.41	2.91	1.81818	61.5232	0.05	-0.12	-0.6	0.0759722	-14.6771	0.00813008	-0.0339943	-0.17094
1	260	6.79	3.59	3.23	1.89136	78.7348	6.13	4.82	4.29	1.27178	126.755	-0.66	1.23	1.06	-0.619581	48.0201	-0.0972018	0.342618	0.328173
1	260	6.96	3.92	3.34	1.77551	91.1259	6.56	3.96	3.52	1.65657	91.4412	-0.4	0.04	0.18	-0.118945	0.315264	-0.0574713	0.0102041	0.0538922
1	260	6.69	3.91	3.3	1.711	86.3211	6.13	4.13	3.51	1.48426	88.8623	-0.56	0.22	0.21	-0.226736	2.54125	-0.083707	0.056266	0.0636364
1	260	6.33	3.37	3.61	1.87834	77.0089	6.12	4.31	3.5	1.41995	92.3202	-0.21	0.94	-0.11	-0.458385	15.3113	-0.0331754	0.278932	-0.0304709
1	260	6.43	3.55	3.71	1.81127	84.6863	6.03	4.3	3.64	1.40233	94.3816	-0.4	0.75	-0.07	-0.408942	9.69524	-0.0622084	0.211268	-0.0188679
1	260	6.26	3.33	3.21	1.87988	66.915	6.49	4.02	3.45	1.61443	90.0098	0.23	0.69	0.24	-0.265452	23.0948	0.0367412	0.207207	0.0747664
1	260	7.13	3.7	3.63	1.92703	95.763	5.51	4.69	3.8	1.17484	98.1992	-1.62	0.99	0.17	-0.752187	2.43619	-0.227209	0.267568	0.046832
1	260	6.8	3.68	3.31	1.84783	82.8294	5.54	4.85	3.98	1.14227	106.939	-1.26	1.17	0.67	-0.705558	24.1092	-0.185294	0.317935	0.202417
1	260	6.72	3.37	3.15	1.99407	71.3362	5.99	4.99	3.95	1.2004	118.066	-0.73	1.62	0.8	-0.793664	46.7297	-0.108631	0.480712	0.253968
1	260	6.38	3.2	3.19	1.99375	65.127	6.14	3.96	3.72	1.55051	90.4496	-0.24	0.76	0.53	-0.443245	25.3225	-0.0376176	0.2375	0.166144
1	260	6.5	3.77	3.22	1.72414	78.9061	6.01	4.47	3.65	1.34452	98.0562	-0.49	0.7	0.43	-0.379619	19.1501	-0.0753846	0.185676	0.13354
1	260	6.78	3.53	3.19	1.92068	76.3475	6.05	4.26	3.53	1.42019	90.9787	-0.73	0.73	0.34	-0.500492	14.6311	-0.10767	0.206799	0.106583
1	260	6.6	3.56	3.45	1.85393	81.0612	6.38	5.07	3.95	1.25838	127.769	-0.22	1.51	0.5	-0.59555	46.7079	-0.0333333	0.424157	0.144928
1	260	6.82	3.4	3.38	2.00588	78.3754	5.72	4.03	3.66	1.41935	84.3689	-1.1	0.63	0.28	-0.586528	5.99342	-0.16129	0.185294	0.0828402
1	260	6.56	3.33	3.64	1.96997	79.5151	6.28	4.11	3.36	1.52798	86.7243	-0.28	0.78	-0.28	-0.441989	7.20922	-0.0426829	0.234234	-0.0769231
1	260	5.8	3.25	2.85	1.78462	53.7225	5.73	3.55	2.98	1.61408	60.6177	-0.07	0.3	0.13	-0.170531	6.89517	-0.012069	0.0923077	0.045614
3	260	6.32	3.83	3.28	1.65013	79.3944	5.43	4.62	3.63	1.17532	91.0644	-0.89	0.79	0.35	-0.474806	11.67	-0.140823	0.206266	0.106707
3	260	6.68	3.17	3.35	2.10726	70.9383	5.68	4.48	3.83	1.26786	97.4597	-1	1.31	0.48	-0.839398	26.5215	-0.149701	0.413249	0.143284
3	260	6.53	3.23	3.4	2.02167	71.7125	6.02	4.39	3.54	1.3713	93.5544	-0.51	1.16	0.14	-0.650373	21.842	-0.0781011	0.359133	0.0411765
3	260	6.51	3.68	3.32	1.76902	79.5366	6.33	4.41	3.76	1.43537	104.962	-0.18	0.73	0.44	-0.333648	25.425	-0.0276498	0.19837	0.13253
3	260	6.95	3.57	3.57	1.94678	88.5771	6.14	4.21	3.73	1.45843	96.4183	-0.81	0.64	0.16	-0.488346	7.84121	-0.116547	0.179272	0.0448179
3	260	6.75	3.5	3.48	1.92857	82.215	5.57	4.65	3.89	1.19785	100.753	-1.18	1.15	0.41	-0.730722	18.5379	-0.174815	0.328571	0.117816
3	260	5.83	3.53	3.15	1.65156	64.8267	5.9	4.42	3.84	1.33484	100.14	0.07	0.89	0.69	-0.316716	35.3128	0.0120069	0.252125	0.219048
3	260	7.07	3.69	3.47	1.91599	90.5264	5.42	4.03	3.74	1.34491	81.6913	-1.65	0.34	0.27	-0.571076	-8.83508	-0.23338	0.0921409	0.0778098
3	260	7.33	3.62	3.37	2.02486	89.4216	5.48	3.94	3.61	1.39086	77.9442	-1.85	0.32	0.24	-0.633999	-11.4774	-0.252387	0.0883978	0.0712166
3	260	6.72	3.69	3.36	1.82114	83.3172	5.68	4.51	3.75	1.25942	96.063	-1.04	0.82	0.39	-0.561715	12.7458	-0.154762	0.222222	0.116071
3	260	6.85	3.61	3.2	1.89751	79.1312	5.79	4.14	3.77	1.39855	90.3692	-1.06	0.53	0.57	-0.498956	11.238	-0.154745	0.146814	0.178125
3	260	6.74	3.7	3.49	1.82162	87.0336	6.16	4.4	3.39	1.4	91.8826	-0.58	0.7	-0.1	-0.421622	4.84894	-0.0860534	0.189189	-0.0286533
3	260	6.72	3.75	3.39	1.792	85.428	5.47	4.35	3.48	1.25747	82.8049	-1.25	0.6	0.09	-0.534529	-2.62314	-0.186012	0.16	0.0265487
3	260	6.46	3.63	3.16	1.77961	74.1014	5.95	4.28	3.72	1.39019	94.7335	-0.51	0.65	0.56	-0.389427	20.6322	-0.0789474	0.179063	0.177215
3	260	7.19	3.74	3.3	1.92246	88.739	5.85	4.22	3.62	1.38626	89.3669	-1.34	0.48	0.32	-0.536204	0.62796	-0.18637	0.128342	0.0969697
3	260	6.58	3.45	3.11	1.90725	70.6001	5.88	3.85	3.49	1.52727	79.0066	-0.7	0.4	0.38	-0.379974	8.40651	-0.106383	0.115942	0.122186
3	260	6.88	3.51	3.42	1.96011	82.5889	6.11	4.23	4.14	1.44444	107	-0.77	0.72	0.72	-0.51567	24.4106	-0.111919	0.205128	0.210526
3	260	6.38	3.26	3.22	1.95706	66.9721	5.63	4.06	3.68	1.3867	84.1167	-0.75	0.8	0.46	-0.570356	17.1446	-0.117555	0.245399	0.142857
3	260	7.18	3.48	3.28	2.06322	81.9554	5.92	4.05	3.89	1.46173	93.2666	-1.26	0.57	0.61	-0.60149	11.3112	-0.175487	0.163793	0.185976
3	260	6.73	3.69	3.53	1.82385	87.663	5.11	4.18	3.51	1.22249	74.9729	-1.62	0.49	-0.02	-0.60136	-12.6901	-0.240713	0.132791	-0.00566572
5	260	6.19	3.41	2.97	1.81525	62.6905	5.72	4.04	3.49	1.41584	80.6497	-0.47	0.63	0.52	-0.399408	17.9592	-0.0759289	0.184751	0.175084
5	260	6.26	3.23	3.09	1.93808	62.4792	5.78	4.46	3.5	1.29596	90.2258	-0.48	1.23	0.41	-0.642116	27.7466	-0.0766773	0.380805	0.132686
5	260	5.95	3.22	3.06	1.84783	58.6265	5.66	3.32	2.92	1.70482	54.8703	-0.29	0.1	-0.14	-0.143007	-3.75624	-0.0487395	0.0310559	-0.0457516
5	260	6.09	3.27	3.25	1.86239	64.7215	5.31	4.12	3.31	1.28883	72.4135	-0.78	0.85	0.06	-0.57355	7.69206	-0.128079	0.259939	0.0184615
5	260	6.65	3.63	3.56	1.83196	85.9366	5.51	3.88	3.3	1.4201	70.55	-1.14	0.25	-0.26	-0.411853	-15.3866	-0.171429	0.0688705	-0.0730337
5	260	6.69	3.69	3.57	1.81301	88.1294	5.21	4.23	3.41	1.23168	75.1506	-1.48	0.54	-0.16	-0.58133	-12.9788	-0.221226	0.146341	-0.0448179
5	260	6.76	3.6	3.32	1.87778	80.7955	5.13	3.69	3.17	1.39024	60.0071	-1.63	0.09	-0.15	-0.487534	-20.7884	-0.241124	0.025	-0.0451807
5	260	6.58	3.38	3.19	1.94675	70.9469	4.8	3.76	3.31	1.2766	59.7389	-1.78	0.38	0.12	-0.67015	-11.208	-0.270517	0.112426	0.0376176
5	260	6.34	3.63	3.2	1.74656	73.6454	5.84	4.33	3.65	1.34873	92.2983	-0.5	0.7	0.45	-0.397827	18.6528	-0.0788644	0.192837	0.140625
5	260	7.06	3.59	3.37	1.96657	85.414	5.48	3.62	3.43	1.51381	68.043	-1.58	0.03	0.06	-0.452762	-17.371	-0.223796	0.00835655	0.0178042
5	260	6.11	3.3	2.86	1.85152	57.6662	5.27	3.86	3.43	1.36528	69.7737	-0.84	0.56	0.57	-0.48623	12.1076	-0.13748	0.169697	0.199301
5	260	7.01	3.81	3.57	1.8399	95.3479	4.85	4.05	3.15	1.19753	61.8739	-2.16	0.24	-0.42	-0.642364	-33.474	-0.308131	0.0629921	-0.117647
5	260	7.07	3.62	3.46	1.95304	88.5532	5.16	4.28	3.73	1.20561	82.3763	-1.91	0.66	0.27	-0.747431	-6.17686	-0.270156	0.18232	0.0780347
5	260	6.35	3.24	3	1.95988	61.722	5.58	4.25	3.48	1.31294	82.5282	-0.77	1.01	0.48	-0.646935	20.8062	-0.12126	0.311728	0.16
5	260	6.56	3.43	3.16	1.91254	71.1025	5.17	3.67	3.11	1.40872	59.0088	-1.39	0.24	-0.05	-0.503817	-12.0937	-0.21189	0.0699708	-0.0158228
5	260	6.38	3.37	3.46	1.89318	74.3921	5.07	5.02	4.03	1.00996	102.569	-1.31	1.65	0.57	-0.883215	28.1771	-0.205329	0.489614	0.16474
5	260	7	3.51	3.44	1.9943	84.5208	5.07	3.96	3.36	1.2803	67.4594	-1.93	0.45	-0.08	-0.713999	-17.0614	-0.275714	0.128205	-0.0232558
5	260	6.43	3.14	3.25	2.04777	65.6181	5.55	4.08	3.27	1.36029	74.0459	-0.88	0.94	0.02	-0.687477	8.42773	-0.136858	0.299363	0.00615385
5	260	6.42	3.03	2.91	2.11881	56.6071	5.93	4.23	3.6	1.40189	90.302	-0.49	1.2	0.69	-0.716921	33.695	-0.076324	0.39604	0.237113
5	260	6.13	3.5	3.45	1.75143	74.0198	4.85	3.75	3.4	1.29333	61.8375	-1.28	0.25	-0.05	-0.458095	-12.1823	-0.208809	0.0714286	-0.0144928
1	270	6.96	3.85	3.27	1.80779	87.6229	5.87	4.37	3.79	1.34325	97.2207	-1.09	0.52	0.52	-0.464543	9.59778	-0.156609	0.135065	0.159021
1	270	7.21	3.58	3.4	2.01397	87.7601	5.47	5.04	4.46	1.08532	122.957	-1.74	1.46	1.06	-0.928649	35.1967	-0.241331	0.407821	0.311765
1	270	6.68	3.78	3.29	1.7672	83.0738	5.77	4.56	3.95	1.26535	103.929	-0.91	0.78	0.66	-0.501845	20.8554	-0.136228	0.206349	0.200608
1	270	6.83	3.89	3.7	1.75578	98.3042	6.03	4.79	4.14	1.25887	119.579	-0.8	0.9	0.44	-0.496911	21.2743	-0.11713	0.231362	0.118919
1	270	6.96	3.7	3.45	1.88108	88.8444	5.58	4.29	3.63	1.3007	86.8957	-1.38	0.59	0.18	-0.580382	-1.94873	-0.198276	0.159459	0.0521739
1	270	6.62	3.45	3.1	1.91884	70.8009	5.48	3.68	3.47	1.48913	69.9774	-1.14	0.23	0.37	-0.42971	-0.823492	-0.172205	0.0666667	0.119355
1	270	7.12	3.52	3.4	2.02273	85.2122	5.9	4.49	3.81	1.31403	100.931	-1.22	0.97	0.41	-0.708696	15.7186	-0.171348	0.275568	0.120588
1	270	6.93	3.55	3.7	1.95211	91.0255	5.19	4.26	3.64	1.21831	80.4782	-1.74	0.71	-0.06	-0.733803	-10.5473	-0.251082	0.2	-0.0162162
1	270	7.33	3.8	3.49	1.92895	97.2105	5.85	4.32	3.66	1.35417	92.4955	-1.48	0.52	0.17	-0.574781	-4.71494	-0.20191	0.136842	0.0487106
1	270	6.49	3.43	3.32	1.89213	73.9055	5.66	5.1	3.73	1.1098	107.67	-0.83	1.67	0.41	-0.782324	33.7647	-0.127889	0.48688	0.123494
1	270	6.22	3.17	2.96	1.96215	58.3635	5.74	4.77	4.19	1.20335	114.721	-0.48	1.6	1.23	-0.758791	56.3579	-0.0771704	0.504732	0.415541
1	270	6.61	3.29	3.07	2.00912	66.763	5.74	5	4.01	1.148	115.087	-0.87	1.71	0.94	-0.861119	48.324	-0.131619	0.519757	0.306189
1	270	6.97	3.67	3.67	1.89918	93.8782	5.04	3.89	3.16	1.29563	61.9537	-1.93	0.22	-0.51	-0.603553	-31.9245	-0.276901	0.0599455	-0.138965
1	270	6.71	3.67	3.21	1.82834	79.0485	5.53	4.82	3.91	1.1473	104.219	-1.18	1.15	0.7	-0.681035	25.171	-0.175857	0.313351	0.218069
1	270	6.83	3.79	3.56	1.80211	92.1531	5.78	4.08	3.56	1.41667	83.9533	-1.05	0.29	0	-0.385444	-8.19975	-0.153734	0.0765172	0
1	270	6.7	3.73	3.18	1.79625	79.4714	5.85	5.07	4.19	1.15385	124.273	-0.85	1.34	1.01	-0.6424	44.8019	-0.126866	0.359249	0.31761
1	270	7.21	3.78	3.61	1.90741	98.3862	5.78	5.12	4.2	1.12891	124.293	-1.43	1.34	0.59	-0.778501	25.9069	-0.198336	0.354497	0.163435
1	270	6.92	3.43	3.35	2.01749	79.5143	5.6	4.59	3.97	1.22004	102.045	-1.32	1.16	0.62	-0.797449	22.5306	-0.190751	0.338192	0.185075
1	270	5.68	3.17	2.82	1.7918	50.7758	5.89	4.53	4.05	1.30022	108.061	0.21	1.36	1.23	-0.491577	57.2851	0.0369718	0.429022	0.43617
1	270	6.91	3.58	3.3	1.93017	81.6347	5.87	4.48	3.95	1.31027	103.876	-1.04	0.9	0.65	-0.6199	22.2408	-0.150507	0.251397	0.19697
3	270	6.38	3.63	3.61	1.75758	83.6054	5.77	4.69	3.93	1.23028	106.351	-0.61	1.06	0.32	-0.527299	22.7455	-0.0956113	0.292011	0.0886427
3	270	6.63	3.62	3.64	1.83149	87.3622	5.43	4.57	3.87	1.18818	96.0344	-1.2	0.95	0.23	-0.643308	8.67225	-0.180995	0.262431	0.0631868
3	270	6.82	3.53	3.68	1.93201	88.5945	6.04	4.26	3.74	1.41784	96.2317	-0.78	0.73	0.06	-0.514171	7.63717	-0.11437	0.206799	0.0163043
3	270	6.03	3.58	3.04	1.68436	65.6257	5.37	4.95	4.02	1.08485	106.858	-0.66	1.37	0.98	-0.599509	41.2319	-0.109453	0.382682	0.322368
3	270	6.7	3.73	3.49	1.79625	87.2186	5.64	5.26	4.25	1.07224	126.082	-1.06	1.53	0.76	-0.724003	38.8636	-0.158209	0.410188	0.217765
3	270	7.12	3.69	3.36	1.92954	88.2766	5.21	4.85	4.22	1.07423	106.633	-1.91	1.16	0.86	-0.855312	18.3565	-0.268258	0.314363	0.255952
3	270	6.59	3.46	3.54	1.90462	80.717	5.24	5.15	4.3	1.01748	116.04	-1.35	1.69	0.76	-0.887149	35.3228	-0.204856	0.488439	0.214689
3	270	6.8	3.79	3.41	1.7942	87.8825	5.4	4.4	4.01	1.22727	95.2776	-1.4	0.61	0.6	-0.566923	7.39508	-0.205882	0.16095	0.175953
3	270	6.49	3.28	2.75	1.97866	58.5398	5.38	4.12	3.39	1.30583	75.1414	-1.11	0.84	0.64	-0.672833	16.6016	-0.171032	0.256098	0.232727
3	270	6.63	3.46	3.1	1.91618	71.1134	5.28	4.86	4.22	1.08642	108.289	-1.35	1.4	1.12	-0.829765	37.1752	-0.20362	0.404624	0.36129
3	270	6.33	3.42	3.52	1.85088	76.2031	5.48	4.71	4.34	1.16348	112.019	-0.85	1.29	0.82	-0.687395	35.8158	-0.134281	0.377193	0.232955
3	270	6.58	3.55	3.42	1.85352	79.8878	5.24	4.11	3.66	1.27494	78.8232	-1.34	0.56	0.24	-0.578582	-1.06456	-0.203647	0.157746	0.0701754
3	270	7.65	3.84	3.46	1.99219	101.641	5.2	4.48	3.83	1.16071	89.2237	-2.45	0.64	0.37	-0.831473	-12.4173	-0.320261	0.166667	0.106936
3	270	6.91	3.62	3.25	1.90884	81.2962	4.69	4.49	3.67	1.04454	77.2832	-2.22	0.87	0.42	-0.864296	-4.01292	-0.321274	0.240331	0.129231
3	270	6.7	3.42	3.24	1.95906	74.2414	5.36	3.73	3.17	1.437	63.3772	-1.34	0.31	-0.07	-0.522067	-10.8642	-0.2	0.0906433	-0.0216049
3	270	6.23	3.28	3.25	1.89939	66.4118	6.28	4.54	3.98	1.38326	113.475	0.05	1.26	0.73	-0.51613	47.0628	0.00802568	0.384146	0.224615
3	270	7.08	3.73	3.59	1.89812	94.8062	5.49	4.27	3.49	1.28571	81.8136	-1.59	0.54	-0.1	-0.612409	-12.9925	-0.224576	0.144772	-0.0278552
3	270	6.78	3.82	3.91	1.77487	101.267	5.37	4.16	3.97	1.29087	88.6866	-1.41	0.34	0.06	-0.484004	-12.5808	-0.207965	0.0890052	0.0153453
3	270	6.35	3.53	3.61	1.79887	80.92	5.66	4.23	3.54	1.33806	84.754	-0.69	0.7	-0.07	-0.460805	3.83402	-0.108661	0.1983	-0.0193906
3	270	7.09	3.88	3.56	1.82732	97.9328	5.29	4.11	3.93	1.2871	85.4457	-1.8	0.23	0.37	-0.540215	-12.4871	-0.253879	0.0592784	0.103933
5	270	3.98	6.92	4.21	0.575145	115.95	5.38	4.25	3.45	1.26588	78.8842	1.4	-2.67	-0.76	0.690738	-37.0659	0.351759	-0.385838	-0.180523
5	270	6.06	3.22	3.23	1.88199	63.0276	4.69	4.24	3.71	1.10613	73.7756	-1.37	1.02	0.48	-0.775856	10.7479	-0.226073	0.31677	0.148607
5	270	6.59	3.58	3.44	1.84078	81.1572	5.44	4	3.34	1.36	72.6784	-1.15	0.42	-0.1	-0.480782	-8.47877	-0.174507	0.117318	-0.0290698
5	270	6.84	3.64	3.04	1.87912	75.6887	5.53	4.26	3.55	1.29812	83.6302	-1.31	0.62	0.51	-0.580999	7.94149	-0.19152	0.17033	0.167763
5	270	6.47	3.31	3.34	1.95468	71.5284	4.89	3.96	3.36	1.23485	65.0644	-1.58	0.65	0.02	-0.719834	-6.46405	-0.244204	0.196375	0.00598802
5	270	6.54	3.5	2.88	1.86857	65.9232	4.79	4.03	3.6	1.18859	69.4933	-1.75	0.53	0.72	-0.679986	3.57012	-0.267584	0.151429	0.25
5	270	7.08	3.37	3.24	2.10089	77.3051	5.21	4.15	3.5	1.25542	75.6753	-1.87	0.78	0.26	-0.845469	-1.62985	-0.264124	0.231454	0.0802469
5	270	6.61	3.28	3.09	2.01524	66.9937	4.92	4.56	3.66	1.07895	82.1128	-1.69	1.28	0.57	-0.936297	15.1192	-0.255673	0.390244	0.184466
5	270	5.74	3.06	2.69	1.87582	47.2482	4.91	3.62	3.14	1.35635	55.811	-0.83	0.56	0.45	-0.519463	8.56275	-0.144599	0.183007	0.167286
5	270	6.71	3.61	3.12	1.85873	75.5761	5.11	3.56	3.34	1.43539	60.7599	-1.6	-0.05	0.22	-0.423333	-14.8161	-0.23845	-0.0138504	0.0705128
5	270	6.51	3.17	3.06	2.05363	63.1483	4.9	4.08	3.5	1.20098	69.972	-1.61	0.91	0.44	-0.852647	6.8237	-0.247312	0.287066	0.143791
5	270	6.94	3.5	3.4	1.98286	82.586	5.16	4.16	3.58	1.24038	76.8468	-1.78	0.66	0.18	-0.742473	-5.73915	-0.256484	0.188571	0.0529412
5	270	6.77	3.42	3.17	1.97953	73.3963	4.44	3.05	3.03	1.45574	41.0323	-2.33	-0.37	-0.14	-0.523794	-32.364	-0.344165	-0.108187	-0.044164
5	270	7.08	3.68	3.31	1.92391	86.2401	5.44	4.02	3.48	1.35323	76.1034	-1.64	0.34	0.17	-0.570679	-10.1366	-0.231638	0.0923913	0.0513595
5	270	6.97	3.76	3.3	1.85372	86.4838	4.86	4.41	3.61	1.10204	77.3717	-2.11	0.65	0.31	-0.751683	-9.11207	-0.302726	0.172872	0.0939394
5	270	6.73	3.64	3.48	1.8489	85.2503	5.13	4.29	3.59	1.1958	79.0076	-1.6	0.65	0.11	-0.653097	-6.24261	-0.237741	0.178571	0.0316092
5	270	5.95	2.98	2.7	1.99664	47.8737	5.1	4.33	3.31	1.17783	73.0947	-0.85	1.35	0.61	-0.818815	25.221	-0.142857	0.45302	0.225926
5	270	7.04	3.73	3.41	1.8874	89.5439	4.66	3.54	3.03	1.31638	49.9841	-2.38	-0.19	-0.38	-0.571015	-39.5598	-0.338068	-0.0509383	-0.111437
5	270	6.35	3.34	3.27	1.9012	69.3534	5.18	4.04	3.23	1.28218	67.5949	-1.17	0.7	-0.04	-0.619019	-1.75857	-0.184252	0.209581	-0.0122324
5	270	5.52	2.59	2.75	2.13127	39.3162	5.64	4.74	4.06	1.18987	108.538	0.12	2.15	1.31	-0.941401	69.2222	0.0217391	0.830116	0.476364
1	280	6.92	3.62	3.64	1.9116	91.1835	5.9	4.25	3.62	1.38824	90.7715	-1.02	0.63	-0.02	-0.523367	-0.411956	-0.147399	0.174033	-0.00549451
1	280	6.51	3.71	3.43	1.75472	82.8417	6.34	4.5	4.04	1.40889	115.261	-0.17	0.79	0.61	-0.345828	32.4195	-0.0261137	0.212938	0.177843
1	280	6.49	3.2	3.07	2.02812	63.7578	5.24	4.3	3.4	1.2186	76.6088	-1.25	1.1	0.33	-0.80952	12.851	-0.192604	0.34375	0.107492
1	280	6.35	3.22	3.58	1.97205	73.2003	6.01	4.38	3.79	1.37215	99.7672	-0.34	1.16	0.21	-0.599904	26.5669	-0.0535433	0.360248	0.0586592
1	280	7	3.83	3.68	1.82768	98.6608	5.65	5.07	4.2	1.1144	120.311	-1.35	1.24	0.52	-0.713278	21.6503	-0.192857	0.32376	0.141304
1	280	6.63	3.45	3.27	1.92174	74.7963	5.69	4.8	4.26	1.18542	116.349	-0.94	1.35	0.99	-0.736322	41.5528	-0.14178	0.391304	0.302752
1	280	7.01	3.63	3.29	1.93113	83.7183	5.55	5.06	4.36	1.09684	122.442	-1.46	1.43	1.07	-0.834292	38.7236	-0.208274	0.393939	0.325228
1	280	7.1	3.61	3.58	1.96676	91.759	6.17	4.99	4.09	1.23647	125.924	-0.93	1.38	0.51	-0.730286	34.1652	-0.130986	0.382271	0.142458
1	280	7.33	3.49	3.41	2.10029	87.2336	5.38	4.46	3.56	1.20628	85.4215	-1.95	0.97	0.15	-0.894009	-1.81211	-0.26603	0.277937	0.0439883
1	280	7.1	3.81	3.45	1.86352	93.326	5.69	4.36	3.87	1.30505	96.0085	-1.41	0.55	0.42	-0.558471	2.68256	-0.198592	0.144357	0.121739
1	280	6.58	3.55	3.64	1.85352	85.0268	5.59	4.88	3.97	1.14549	108.298	-0.99	1.33	0.33	-0.708029	23.2717	-0.150456	0.374648	0.0906593
1	280	6.4	3.43	3.34	1.86589	73.3197	5.21	4.37	3.59	1.19222	81.736	-1.19	0.94	0.25	-0.67367	8.41636	-0.185938	0.274052	0.0748503
1	280	6.19	3.4	3.13	1.82059	65.874	5.11	4.45	3.59	1.14831	81.6348	-1.08	1.05	0.46	-0.672274	15.7608	-0.174475	0.308824	0.146965
1	280	6.73	3.62	3.5	1.85912	85.2691	6.43	4.88	4.31	1.31762	135.241	-0.3	1.26	0.81	-0.541493	49.9718	-0.0445765	0.348066	0.231429
1	280	6.58	3.67	3.33	1.79292	80.4148	5.57	4.63	3.84	1.20302	99.0301	-1.01	0.96	0.51	-0.589892	18.6153	-0.153495	0.26158	0.153153
1	280	6.96	3.57	3.5	1.94958	86.9652	5.33	4.66	3.98	1.14378	98.8544	-1.63	1.09	0.48	-0.805803	11.8892	-0.234195	0.305322	0.137143
1	280	6.85	3.39	3.46	2.02065	80.3464	5.36	4.97	4.11	1.07847	109.487	-1.49	1.58	0.65	-0.942178	29.1407	-0.217518	0.466077	0.187861
1	280	7.15	3.7	3.68	1.93243	97.3544	6.07	4.4	3.82	1.37955	102.025	-1.08	0.7	0.14	-0.552887	4.67016	-0.151049	0.189189	0.0380435
1	280	6.89	3.24	3.57	2.12654	79.6953	5.26	4.12	3.87	1.2767	83.8675	-1.63	0.88	0.3	-0.849844	4.17229	-0.236575	0.271605	0.0840336
1	280	6.84	3.75	3.53	1.824	90.5445	5.13	4.32	3.9	1.1875	86.4302	-1.71	0.57	0.37	-0.6365	-4.11426	-0.25	0.152	0.104816
3	280	7.08	3.51	3.33	2.01709	82.7532	5.3	5.23	4.08	1.01338	113.094	-1.78	1.72	0.75	-1.00371	30.3404	-0.251412	0.490028	0.225225
3	280	6.85	3.52	2.98	1.94602	71.8538	5.35	4.78	4.02	1.11925	102.803	-1.5	1.26	1.04	-0.826776	30.9497	-0.218978	0.357955	0.348993
3	280	7.02	3.72	3.4	1.8871	88.789	4.6	4.4	4.04	1.04545	81.7696	-2.42	0.68	0.64	-0.841642	-7.01936	-0.344729	0.182796	0.188235
3	280	7.05	3.83	3.4	1.84073	91.8051	4.46	4.46	3.86	1	76.7816	-2.59	0.63	0.46	-0.840731	-15.0235	-0.367376	0.164491	0.135294
3	280	6.87	3.36	3.54	2.04464	81.7145	5.33	5.45	4.4	0.977982	127.813	-1.54	2.09	0.86	-1.06666	46.0989	-0.224163	0.622024	0.242938
3	280	6.79	3.87	3.35	1.75452	88.029	5.04	4.88	4.27	1.03279	105.022	-1.75	1.01	0.92	-0.721735	16.9925	-0.257732	0.260982	0.274627
3	280	7.49	3.87	3.48	1.9354	100.872	5.56	4.45	4	1.24944	98.968	-1.93	0.58	0.52	-0.685962	-1.90432	-0.257677	0.149871	0.149425
3	280	6.78	3.62	3.3	1.87293	80.9939	5.32	4.93	3.91	1.07911	102.55	-1.46	1.31	0.61	-0.793821	21.556	-0.215339	0.361878	0.184848
3	280	6.92	3.81	3.36	1.81627	88.5871	4.75	4.48	3.83	1.06027	81.5024	-2.17	0.67	0.47	-0.756005	-7.08467	-0.313584	0.175853	0.139881
3	280	6.16	3.35	3.61	1.83881	74.496	5.24	4.75	3.93	1.10316	97.8177	-0.92	1.4	0.32	-0.735648	23.3217	-0.149351	0.41791	0.0886427
3	280	6.62	3.9	3.32	1.69744	85.7158	4.7	4.59	3.62	1.02397	78.0943	-1.92	0.69	0.3	-0.673471	-7.6215	-0.29003	0.176923	0.0903614
3	280	7.17	3.79	3.77	1.89182	102.447	5.46	5.03	4.29	1.08549	117.82	-1.71	1.24	0.52	-0.806334	15.3726	-0.238494	0.327177	0.137931
3	280	7.36	3.83	3.61	1.92167	101.762	5.13	4.57	3.78	1.12254	88.6187	-2.23	0.74	0.17	-0.799133	-13.1429	-0.302989	0.193211	0.0470914
3	280	6.98	3.75	3.38	1.86133	88.4715	4.91	5.5	4.03	0.892727	108.83	-2.07	1.75	0.65	-0.968606	20.3587	-0.296562	0.466667	0.192308
3	280	7.51	3.97	3.68	1.89169	109.718	5.49	4.56	4.17	1.20395	104.393	-2.02	0.59	0.49	-0.68774	-5.32465	-0.268975	0.148615	0.133152
3	280	6.84	3.64	3.34	1.87912	83.158	5.27	4.15	3.44	1.26988	75.2345	-1.57	0.51	0.1	-0.609241	-7.92346	-0.229532	0.14011	0.0299401
3	280	6.46	3.35	2.98	1.92836	64.4902	5.4	4.74	3.47	1.13924	88.8181	-1.06	1.39	0.49	-0.789118	24.3279	-0.164087	0.414925	0.16443
3	280	6.88	3.35	3.16	2.05373	72.8317	5.17	4.28	3.82	1.20794	84.5274	-1.71	0.93	0.66	-0.845787	11.6958	-0.248547	0.277612	0.208861
3	280	6.06	3.07	2.86	1.97394	53.208	5.52	4.29	3.49	1.28671	82.646	-0.54	1.22	0.63	-0.687228	29.438	-0.0891089	0.397394	0.22028
3	280	6.22	3.52	3.1	1.76705	67.8726	4.79	3.56	3.09	1.34551	52.6919	-1.43	0.04	-0.01	-0.42154	-15.1807	-0.229904	0.0113636	-0.00322581
5	280	5.85	3.01	2.84	1.94352	50.0081	4.97	4.47	3.58	1.11186	79.5329	-0.88	1.46	0.74	-0.831665	29.5248	-0.150427	0.48505	0.260563
5	280	6.57	3.55	3.03	1.8507	70.6702	4.78	4.02	3.37	1.18905	64.7566	-1.79	0.47	0.34	-0.661649	-5.91363	-0.272451	0.132394	0.112211
5	280	6.62	3.51	3.03	1.88604	70.4057	4.8	4.03	3.44	1.19107	66.5434	-1.82	0.52	0.41	-0.694973	-3.86233	-0.274924	0.148148	0.135314
5	280	6.8	3.68	3.57	1.84783	89.3357	5.48	3.94	3.18	1.39086	68.66	-1.32	0.26	-0.39	-0.456963	-20.6757	-0.194118	0.0706522	-0.109244
5	280	6.73	3.67	3.29	1.83379	81.26	4.56	3.02	2.52	1.50993	34.7034	-2.17	-0.65	-0.77	-0.323854	-46.5566	-0.322437	-0.177112	-0.234043
5	280	6.41	3.06	3.24	2.09477	63.5513	4.51	3.59	3.19	1.25627	51.649	-1.9	0.53	-0.05	-0.838504	-11.9023	-0.296412	0.173203	-0.0154321
5	280	5.85	3.09	2.92	1.8932	52.7834	4.37	3.94	3.02	1.10914	51.9978	-1.48	0.85	0.1	-0.784067	-0.785624	-0.252991	0.275081	0.0342466
5	280	6.53	3.2	3.5	2.04062	73.136	4.81	3.52	3.18	1.36648	53.8412	-1.72	0.32	-0.32	-0.674148	-19.2948	-0.2634	0.1	-0.0914286
5	280	6.87	3.45	3.12	1.9913	73.9487	4.83	3.89	3.25	1.24165	61.0633	-2.04	0.44	0.13	-0.749659	-12.8854	-0.296943	0.127536	0.0416667
5	280	6.19	3.09	3.17	2.00324	60.6329	5.13	4.32	3.59	1.1875	79.5601	-1.06	1.23	0.42	-0.815736	18.9272	-0.171244	0.398058	0.132492
5	280	6.92	3.32	2.96	2.08434	68.0042	4.77	3.69	3.12	1.29268	54.9161	-2.15	0.37	0.16	-0.791654	-13.0882	-0.310694	0.111446	0.0540541
5	280	7.22	3.38	3.25	2.13609	79.3117	4.69	4.32	3.83	1.08565	77.5989	-2.53	0.94	0.58	-1.05045	-1.71284	-0.350416	0.278107	0.178462
5	280	7.61	3.74	3.45	2.03476	98.1918	4.28	3.83	3.12	1.11749	51.1443	-3.33	0.09	-0.33	-0.917266	-47.0475	-0.437582	0.0240642	-0.0956522
5	280	7.2	3.61	3.54	1.99446	92.0117	5.68	3.84	3.2	1.47917	69.7958	-1.52	0.23	-0.34	-0.515293	-22.2158	-0.211111	0.0637119	-0.0960452
5	280	6.52	3.56	2.95	1.83146	68.473	4.73	4.33	3.56	1.09238	72.912	-1.79	0.77	0.61	-0.739082	4.43896	-0.27454	0.216292	0.20678
5	280	6.31	3.39	2.88	1.86136	61.6058	6.09	4.46	3.76	1.36547	102.127	-0.22	1.07	0.88	-0.495886	40.5211	-0.0348653	0.315634	0.305556
5	280	6.64	3.14	2.97	2.11465	61.9233	4.99	3.96	3.23	1.2601	63.8261	-1.65	0.82	0.26	-0.854549	1.90278	-0.248494	0.261146	0.0875421
5	280	6.58	3.32	3.25	1.98193	70.9982	5.42	4.24	3.66	1.2783	84.1097	-1.16	0.92	0.41	-0.703626	13.1115	-0.176292	0.277108	0.126154
5	280	6.65	3.4	3.34	1.95588	75.5174	5.09	4.12	3.49	1.23544	73.1881	-1.56	0.72	0.15	-0.720445	-2.32931	-0.234586	0.211765	0.0449102
5	280	5.64	2.5	2.54	2.256	35.814	5.58	4.1	3.5	1.36098	80.073	-0.06	1.6	0.96	-0.895024	44.259	-0.0106383	0.64	0.377953
1	290	6.77	3.53	3.15	1.91785	75.279	5.68	4.62	3.88	1.22944	101.817	-1.09	1.09	0.73	-0.68841	26.5384	-0.161004	0.308782	0.231746
1	290	6.64	3.32	3.29	2	72.5274	5.9	4.3	3.66	1.37209	92.8542	-0.74	0.98	0.37	-0.627907	20.3268	-0.111446	0.295181	0.112462
1	290	6.66	3.53	3.1	1.88669	72.8804	4.92	4.7	4.13	1.04681	95.5021	-1.74	1.17	1.03	-0.839877	22.6217	-0.261261	0.331445	0.332258
1	290	6.45	3.21	3.14	2.00935	65.0121	5.3	4.34	4.07	1.2212	93.6181	-1.15	1.13	0.93	-0.788148	28.606	-0.178295	0.352025	0.296178
1	290	7.22	3.85	3.5	1.87532	97.2895	6.34	4.69	3.93	1.35181	116.857	-0.88	0.84	0.43	-0.523512	19.5675	-0.121884	0.218182	0.122857
1	290	7.13	3.79	3.76	1.88127	101.605	5.53	4.69	3.86	1.1791	100.112	-1.6	0.9	0.1	-0.702162	-1.49355	-0.224404	0.237467	0.0265957
1	290	6.38	3.25	3.11	1.96308	64.4858	6.08	4.16	3.69	1.46154	93.3304	-0.3	0.91	0.58	-0.501538	28.8446	-0.0470219	0.28	0.186495
1	290	6.53	3.72	3.62	1.75538	87.9356	6.05	4.83	3.88	1.25259	113.379	-0.48	1.11	0.26	-0.502788	25.4438	-0.0735069	0.298387	0.0718232
1	290	6.44	3.58	3.26	1.79888	75.16	5.13	5.32	4.21	0.964286	114.898	-1.31	1.74	0.95	-0.834597	39.7377	-0.203416	0.486034	0.291411
1	290	7.18	3.6	3.58	1.99444	92.5358	5.23	6.17	4.88	0.84765	157.473	-1.95	2.57	1.3	-1.14679	64.9374	-0.271588	0.713889	0.363128
1	290	6.74	3.55	3.2	1.89859	76.5664	5.55	4.5	3.76	1.23333	93.906	-1.19	0.95	0.56	-0.665258	17.3396	-0.176558	0.267606	0.175
1	290	6.36	3.47	2.99	1.83285	65.9869	4.97	4.6	3.86	1.08043	88.2473	-1.39	1.13	0.87	-0.752418	22.2604	-0.218553	0.325648	0.29097
1	290	6.57	3.33	3.34	1.97297	73.0729	6.28	4.87	3.97	1.28953	121.417	-0.29	1.54	0.63	-0.683445	48.344	-0.04414	0.462462	0.188623
1	290	6.3	3.19	3.22	1.97492	64.7123	5.29	3.94	3.6	1.34264	75.0334	-1.01	0.75	0.38	-0.632282	10.321	-0.160317	0.23511	0.118012
1	290	7.12	3.68	3.33	1.93478	87.2513	5.75	3.99	3.49	1.4411	80.0693	-1.37	0.31	0.16	-0.49368	-7.182	-0.192416	0.0842391	0.048048
1	290	7.3	3.43	3.31	2.12828	82.8791	5.56	4.56	3.84	1.2193	97.3578	-1.74	1.13	0.53	-0.908982	14.4787	-0.238356	0.329446	0.160121
1	290	7.18	3.63	3.28	1.97796	85.488	4.67	4.62	4.04	1.01082	87.1646	-2.51	0.99	0.76	-0.967139	1.67666	-0.349582	0.272727	0.231707
1	290	7.01	3.58	3.34	1.9581	83.82	5.08	4.27	3.8	1.1897	82.4281	-1.93	0.69	0.46	-0.768405	-1.39189	-0.275321	0.192737	0.137725
1	290	6.85	2.64	3.24	2.5947	58.5922	5.41	5.56	2.84	0.973022	85.4261	-1.44	2.92	-0.4	-1.62168	26.8339	-0.210219	1.10606	-0.123457
1	290	6.16	3.18	3.06	1.93711	59.9417	N/A	N/A	N/A
3	290	7.53	4.22	4.1	1.78436	130.284	5.15	4.32	4.03	1.19213	89.6594	-2.38	0.1	-0.07	-0.592231	-40.6246	-0.316069	0.0236967	-0.0170732
3	290	7.3	3.76	3.65	1.94149	100.185	5.39	4.85	4.12	1.11134	107.703	-1.91	1.09	0.47	-0.830149	7.51778	-0.261644	0.289894	0.128767
3	290	6.29	3.55	3.33	1.77183	74.3572	5.25	4.28	3.63	1.22664	81.5661	-1.04	0.73	0.3	-0.545195	7.20887	-0.165342	0.205634	0.0900901
3	290	6.75	3.67	3.79	1.83924	93.8878	5.5	4.36	4.02	1.26147	96.3996	-1.25	0.69	0.23	-0.577769	2.51182	-0.185185	0.188011	0.060686
3	290	7.01	3.86	3.29	1.81606	89.0228	5.08	4.14	3.71	1.22705	78.0258	-1.93	0.28	0.42	-0.589009	-10.997	-0.275321	0.0725389	0.12766
3	290	6.82	3.51	3	1.94302	71.8146	5.48	4.39	3.98	1.24829	95.7477	-1.34	0.88	0.98	-0.694728	23.9331	-0.196481	0.250712	0.326667
3	290	7	3.57	3.93	1.96078	98.2107	5.92	4.65	4.25	1.27312	116.994	-1.08	1.08	0.32	-0.687666	18.7833	-0.154286	0.302521	0.0814249
3	290	7.1	3.57	3.46	1.9888	87.7006	4.91	4.69	4	1.04691	92.1116	-2.19	1.12	0.54	-0.941887	4.41098	-0.308451	0.313725	0.156069
3	290	7.18	3.96	3.6	1.81313	102.358	5.63	4.61	3.89	1.22126	100.962	-1.55	0.65	0.29	-0.591873	-1.39585	-0.215877	0.164141	0.0805556
3	290	6.94	3.87	3.58	1.79328	96.1509	4.84	4.44	3.62	1.09009	77.7924	-2.1	0.57	0.04	-0.703192	-18.3586	-0.302594	0.147287	0.0111732
3	290	6.82	3.4	3.51	2.00588	81.3899	5.89	4.56	4.4	1.29167	118.177	-0.93	1.16	0.89	-0.714216	36.7871	-0.136364	0.341176	0.253561
3	290	6.99	3.71	3.42	1.8841	88.6905	5.5	4.3	3.63	1.27907	85.8495	-1.49	0.59	0.21	-0.605027	-2.84102	-0.213162	0.15903	0.0614035
3	290	6.85	4	3.42	1.7125	93.708	5.76	4.89	4.07	1.17791	114.637	-1.09	0.89	0.65	-0.534586	20.9292	-0.159124	0.2225	0.190058
3	290	7.62	3.82	3.64	1.99476	105.955	4.8	4.45	3.78	1.07865	80.7408	-2.82	0.63	0.14	-0.916113	-25.2138	-0.370079	0.164921	0.0384615
3	290	6.89	3.81	3.69	1.8084	96.8658	5.02	4.58	3.78	1.09607	86.9082	-1.87	0.77	0.09	-0.712329	-9.95757	-0.271408	0.2021	0.0243902
3	290	7.11	3.96	3.63	1.79545	102.205	5.6	4.6	3.9	1.21739	100.464	-1.51	0.64	0.27	-0.578063	-1.74083	-0.212377	0.161616	0.0743802
3	290	6.98	3.76	3.57	1.85638	93.6939	5.22	4.11	3.51	1.27007	75.3042	-1.76	0.35	-0.06	-0.58631	-18.3897	-0.252149	0.0930851	-0.0168067
3	290	7.28	4.07	3.78	1.7887	112	4.72	4.19	3.8	1.12649	75.1518	-2.56	0.12	0.02	-0.662206	-36.848	-0.351648	0.029484	0.00529101
3	290	6.42	3.79	3.26	1.69393	79.3217	5.01	4.49	3.71	1.11581	83.4561	-1.41	0.7	0.45	-0.578118	4.13441	-0.219626	0.184697	0.138037
3	290	6.97	3.72	3.49	1.87366	90.4901	5.04	3.82	3.14	1.31937	60.4538	-1.93	0.1	-0.35	-0.554284	-30.0363	-0.276901	0.0268817	-0.100287
5	290	6.15	3.41	3.51	1.80352	73.61	4.8	4.18	3.57	1.14833	71.6285	-1.35	0.77	0.06	-0.655194	-1.98149	-0.219512	0.225806	0.017094
5	290	6.99	3.07	2.93	2.27687	62.8757	4.47	4.15	3.92	1.07711	72.718	-2.52	1.08	0.99	-1.19976	9.84221	-0.360515	0.351792	0.337884
5	290	6.57	3.41	3.1	1.92669	69.4515	4.84	4.47	3.7	1.08277	80.0488	-1.73	1.06	0.6	-0.843912	10.5973	-0.263318	0.31085	0.193548
5	290	5.91	3.34	2.86	1.76946	56.4547	4.78	4.56	3.84	1.04825	83.6997	-1.13	1.22	0.98	-0.721215	27.245	-0.191201	0.365269	0.342657
5	290	6.25	3.23	3.59	1.93498	72.4731	4.45	4.18	3.71	1.06459	69.0097	-1.8	0.95	0.12	-0.870391	-3.46341	-0.288	0.294118	0.0334262
5	290	6.25	3.09	2.93	2.02265	56.5856	4.3	5.1	4.18	0.843137	91.6674	-1.95	2.01	1.25	-1.17952	35.0818	-0.312	0.650485	0.426621
5	290	6.03	3.63	3.27	1.66116	71.5767	4.28	3.55	2.61	1.20563	39.6563	-1.75	-0.08	-0.66	-0.455523	-31.9204	-0.290216	-0.0220386	-0.201835
5	290	6.08	3.67	3.45	1.65668	76.9819	5.18	3.7	3.1	1.4	59.4146	-0.9	0.03	-0.35	-0.256676	-17.5673	-0.148026	0.00817439	-0.101449
5	290	6.9	3.6	3.67	1.91667	91.1628	4.29	4.35	3.73	0.986207	69.6074	-2.61	0.75	0.06	-0.93046	-21.5554	-0.378261	0.208333	0.0163488
5	290	6.79	3.62	3.28	1.87569	80.6217	5.21	4.3	3.7	1.21163	82.8911	-1.58	0.68	0.42	-0.664063	2.26936	-0.232695	0.187845	0.128049
5	290	6.11	3.36	3.35	1.81845	68.7742	4.91	4.22	3.63	1.16351	75.2143	-1.2	0.86	0.28	-0.654945	6.44017	-0.196399	0.255952	0.0835821
5	290	6.55	3.78	3.33	1.7328	82.4475	4.48	3.85	3.12	1.16364	53.8138	-2.07	0.07	-0.21	-0.569168	-28.6337	-0.316031	0.0185185	-0.0630631
5	290	6.91	3.39	3.17	2.03835	74.2569	4.2	4.56	3.76	0.921053	72.0115	-2.71	1.17	0.59	-1.1173	-2.24541	-0.392185	0.345133	0.18612
5	290	6.98	3.56	3.39	1.96067	84.2374	5.93	4.44	2.75	1.33559	72.4053	-1.05	0.88	-0.64	-0.625089	-11.8321	-0.15043	0.247191	-0.188791
5	290	5.84	2.8	2.56	2.08571	41.8611	4.13	4.22	3.64	0.978673	63.4401	-1.71	1.42	1.08	-1.10704	21.579	-0.292808	0.507143	0.421875
5	290	6.26	3.27	3.35	1.91437	68.5752	4.36	4.35	3.38	1.0023	64.1051	-1.9	1.08	0.03	-0.912074	-4.47009	-0.303514	0.330275	0.00895522
5	290	6.83	3.53	3.39	1.93484	81.7326	4.17	4.6	2.81	0.906522	53.9014	-2.66	1.07	-0.58	-1.02832	-27.8311	-0.389458	0.303116	-0.171091
5	290	3.76	6.68	3.31	0.562874	83.1366	3.78	4.57	3.34	0.827133	57.6972	0.02	-2.11	0.03	0.264259	-25.4394	0.00531915	-0.315868	0.00906344
5	290	6.59	3.39	3.16	1.94395	70.5947	4.07	4.38	4.04	0.929224	72.0195	-2.52	0.99	0.88	-1.01473	1.42475	-0.382398	0.292035	0.278481
5	290	7.26	3.37	3.19	2.1543	78.0472	N/A	N/A	N/A
1	300	7.37	3.76	3.64	1.96011	100.869	5.66	4.71	4.07	1.2017	108.501	-1.71	0.95	0.43	-0.758408	7.63173	-0.232022	0.25266	0.118132
1	300	7.13	3.61	3.56	1.97507	91.6319	6.23	4.44	3.55	1.40315	98.1973	-0.9	0.83	-0.01	-0.571916	6.56535	-0.126227	0.229917	-0.00280899
1	300	7.08	3.66	3.71	1.93443	96.1365	5.45	4.72	4.23	1.15466	108.813	-1.63	1.06	0.52	-0.779765	12.676	-0.230226	0.289617	0.140162
1	300	7.74	3.77	3.62	2.05305	105.631	5.52	4.77	4.13	1.15723	108.745	-2.22	1	0.51	-0.895818	3.11368	-0.286822	0.265252	0.140884
1	300	5.85	3.8	3.42	1.53947	76.0266	5.03	4.23	3.32	1.18913	70.6393	-0.82	0.43	-0.1	-0.350348	-5.38729	-0.140171	0.113158	-0.0292398
1	300	6.28	3.41	3.24	1.84164	69.384	5.32	4.53	3.83	1.17439	92.3015	-0.96	1.12	0.59	-0.667249	22.9175	-0.152866	0.328446	0.182099
1	300	7.05	3.62	3.5	1.94751	89.3235	6.81	4.79	3.93	1.42171	128.196	-0.24	1.17	0.43	-0.525802	38.8727	-0.0340426	0.323204	0.122857
1	300	7.46	2.53	3.68	2.94862	69.4556	5	4.35	3.37	1.14943	73.2975	-2.46	1.82	-0.31	-1.79919	3.84192	-0.329759	0.719368	-0.0842391
1	300	6.44	3.32	3.15	1.93976	67.3495	4.66	4.74	4.21	0.983122	92.9922	-1.78	1.42	1.06	-0.956637	25.6426	-0.276398	0.427711	0.336508
1	300	6.51	3.52	3.49	1.84943	79.974	5.9	4.61	4.02	1.27983	109.34	-0.61	1.09	0.53	-0.569605	29.3659	-0.093702	0.309659	0.151862
1	300	7	3.7	3.34	1.89189	86.506	6.33	4.72	4.01	1.3411	119.809	-0.67	1.02	0.67	-0.55079	33.3032	-0.0957143	0.275676	0.200599
1	300	6.35	3.64	3.18	1.74451	73.5025	5.69	4.52	3.87	1.25885	99.5318	-0.66	0.88	0.69	-0.485656	26.0292	-0.103937	0.241758	0.216981
1	300	6.95	3.68	3.37	1.88859	86.1911	7.87	4.68	4.17	1.68162	153.588	0.92	1	0.8	-0.206963	67.3967	0.132374	0.271739	0.237389
1	300	6.87	3.71	3.45	1.85175	87.9326	5.02	4.49	3.72	1.11804	83.8481	-1.85	0.78	0.27	-0.733712	-4.08451	-0.269287	0.210243	0.0782609
1	300	6.9	3.53	3.19	1.95467	77.6988	5.07	4.89	4.16	1.03681	103.136	-1.83	1.36	0.97	-0.917864	25.4371	-0.265217	0.385269	0.304075
1	300	6.23	3.45	2.97	1.8058	63.8357	5.81	5.21	3.53	1.11516	106.853	-0.42	1.76	0.56	-0.690634	43.0178	-0.0674157	0.510145	0.188552
1	300	6.92	3.7	3.8	1.87027	97.2952	5.55	4.6	3.72	1.20652	94.9716	-1.37	0.9	-0.08	-0.663749	-2.3236	-0.197977	0.243243	-0.0210526
1	300	6.98	3.82	3.61	1.82723	96.2556	5.6	4.77	4.3	1.174	114.862	-1.38	0.95	0.69	-0.653221	18.606	-0.197708	0.248691	0.191136
1	300	6.17	3.17	3.04	1.94637	59.4591	5.5	4.57	3.67	1.2035	92.2455	-0.67	1.4	0.63	-0.742871	32.7864	-0.10859	0.44164	0.207237
1	300	6.26	3.39	3.15	1.84661	66.8474	5.66	4.9	4.24	1.1551	117.592	-0.6	1.51	1.09	-0.691506	50.7448	-0.0958466	0.445428	0.346032
3	300	7.1	3.69	3.55	1.92412	93.0064	4.7	4.3	3.88	1.09302	78.4148	-2.4	0.61	0.33	-0.831096	-14.5916	-0.338028	0.165312	0.0929577
3	300	6.94	3.9	3.44	1.77949	93.107	4.82	4.75	4.25	1.01474	97.3038	-2.12	0.85	0.81	-0.76475	4.19671	-0.305476	0.217949	0.235465
3	300	6.3	3.33	3.12	1.89189	65.4545	5.39	4.46	3.77	1.20852	90.6285	-0.91	1.13	0.65	-0.683372	25.1741	-0.144444	0.339339	0.208333
3	300	6.81	3.71	3.53	1.83558	89.1858	4.98	5.18	3.96	0.96139	102.154	-1.83	1.47	0.43	-0.87419	12.9679	-0.268722	0.396226	0.121813
3	300	7.22	3.58	3.28	2.01676	84.7801	5.73	4.77	4	1.20126	109.328	-1.49	1.19	0.72	-0.815502	24.5483	-0.206371	0.332402	0.219512
3	300	6.55	3.7	3.41	1.77027	82.6414	5.36	4.84	4.27	1.10744	110.774	-1.19	1.14	0.86	-0.662832	28.1327	-0.181679	0.308108	0.252199
3	300	7.21	3.58	3.51	2.01397	90.5994	4.57	3.92	3.48	1.16582	62.3421	-2.64	0.34	-0.03	-0.84815	-28.2573	-0.366158	0.0949721	-0.00854701
3	300	6.84	3.47	3.38	1.97118	80.2236	5.66	4.21	3.51	1.34442	83.6384	-1.18	0.74	0.13	-0.626764	3.41476	-0.172515	0.213256	0.0384615
3	300	6.66	3.48	3.27	1.91379	75.7881	5.55	4.48	3.66	1.23884	91.0022	-1.11	1	0.39	-0.674954	15.2141	-0.166667	0.287356	0.119266
3	300	7.89	3.99	3.78	1.97744	118.999	5.37	4.53	4.02	1.18543	97.7909	-2.52	0.54	0.24	-0.792013	-21.2076	-0.319392	0.135338	0.0634921
3	300	6.02	3.4	2.85	1.77059	58.3338	5.12	4.19	3.36	1.22196	72.0814	-0.9	0.79	0.51	-0.548631	13.7476	-0.149502	0.232353	0.178947
3	300	6.69	3.46	3.28	1.93353	75.9235	4.18	4.74	4.25	0.881857	84.2061	-2.51	1.28	0.97	-1.05167	8.28263	-0.375187	0.369942	0.295732
3	300	7.04	3.33	3.22	2.11411	75.4871	5.04	4.33	3.66	1.16397	79.8729	-2	1	0.44	-0.950142	4.38581	-0.284091	0.3003	0.136646
3	300	7.5	3.9	3.54	1.92308	103.545	4.78	4.2	3.78	1.1381	75.8873	-2.72	0.3	0.24	-0.784982	-27.6577	-0.362667	0.0769231	0.0677966
3	300	6.52	3.26	3.09	2	65.6786	5.68	4.75	4.34	1.19579	117.093	-0.84	1.49	1.25	-0.804211	51.4146	-0.128834	0.457055	0.404531
3	300	6.91	3.87	3.54	1.78553	94.6656	5.04	3.98	3.72	1.26633	74.6202	-1.87	0.11	0.18	-0.519198	-20.0454	-0.270622	0.0284238	0.0508475
3	300	5.97	3.38	3.29	1.76627	66.3876	5.22	4.1	3.61	1.27317	77.2612	-0.75	0.72	0.32	-0.493101	10.8736	-0.125628	0.213018	0.0972644
3	300	7.12	3.69	3.51	1.92954	92.2175	4.77	3.92	3.71	1.21684	69.3711	-2.35	0.23	0.2	-0.712703	-22.8465	-0.330056	0.0623306	0.0569801
3	300	6.9	3.62	3.32	1.90608	82.927	4.76	4.14	3.49	1.14976	68.7753	-2.14	0.52	0.17	-0.756319	-14.1516	-0.310145	0.143646	0.0512048
3	300	6.37	3.28	3.5	1.94207	73.1276	4.85	4.01	3.74	1.20948	72.7374	-1.52	0.73	0.24	-0.732597	-0.39021	-0.238619	0.222561	0.0685714
5	300	6.3	3.52	3.02	1.78977	66.9715	4.9	4.34	3.63	1.12903	77.1956	-1.4	0.82	0.61	-0.66074	10.2241	-0.222222	0.232955	0.201987
5	300	7.03	3.32	3.34	2.11747	77.9543	4.6	4.47	3.7	1.02908	76.0794	-2.43	1.15	0.36	-1.08839	-1.87486	-0.345661	0.346386	0.107784
5	300	5.42	3.03	2.87	1.78878	47.1329	4.34	4.93	4.17	0.880325	89.2222	-1.08	1.9	1.3	-0.908454	42.0893	-0.199262	0.627063	0.452962
5	300	7.09	3.8	3.35	1.86579	90.2557	4.66	3.98	3.46	1.17085	64.1719	-2.43	0.18	0.11	-0.694935	-26.0838	-0.342736	0.0473684	0.0328358
5	300	6.94	3.65	3.36	1.90137	85.1122	5.61	4.47	4.15	1.25503	104.068	-1.33	0.82	0.79	-0.646336	18.9561	-0.191643	0.224658	0.235119
5	300	6.56	3.69	3.46	1.77778	83.7541	4.09	3.95	3.3	1.03544	53.3132	-2.47	0.26	-0.16	-0.742335	-30.441	-0.376524	0.0704607	-0.0462428
5	300	6.33	2.93	3.31	2.16041	61.3902	4.62	4.29	3.7	1.07692	73.3333	-1.71	1.36	0.39	-1.08349	11.943	-0.270142	0.464164	0.117825
5	300	6.25	3.24	3.08	1.92901	62.37	4.91	4.43	3.76	1.10835	81.7849	-1.34	1.19	0.68	-0.82066	19.4149	-0.2144	0.367284	0.220779
5	300	7.24	3.75	3.44	1.93067	93.396	5.06	4.81	4.07	1.05198	99.0581	-2.18	1.06	0.63	-0.878692	5.6621	-0.301105	0.282667	0.18314
5	300	5.94	3.35	2.9	1.77313	57.7071	5.03	3.97	3.56	1.267	71.09	-0.91	0.62	0.66	-0.506132	13.3829	-0.153199	0.185075	0.227586
5	300	6.61	4.02	3.31	1.64428	87.954	5.14	4.79	3.93	1.07307	96.759	-1.47	0.77	0.62	-0.57121	8.80498	-0.22239	0.191542	0.187311
5	300	6.48	3.41	3.23	1.90029	71.3727	4.66	4.07	3.5	1.14496	66.3817	-1.82	0.66	0.27	-0.75533	-4.99096	-0.280864	0.193548	0.0835913
5	300	6.72	3.77	3.36	1.78249	85.1236	4.77	4.5	4.15	1.06	89.0797	-1.95	0.73	0.79	-0.722493	3.95617	-0.290179	0.193634	0.235119
5	300	6.66	3.38	3.17	1.97041	71.3592	4.77	4.12	3.71	1.15777	72.9104	-1.89	0.74	0.54	-0.812647	1.55117	-0.283784	0.218935	0.170347
5	300	5.77	3.02	2.83	1.9106	49.3139	4.27	3.87	3.38	1.10336	55.8542	-1.5	0.85	0.55	-0.807237	6.54028	-0.259965	0.281457	0.194346
5	300	6.34	3.26	3.5	1.94479	72.3394	3.82	3.16	3.17	1.20886	38.2657	-2.52	-0.1	-0.33	-0.735925	-34.0737	-0.397476	-0.0306748	-0.0942857
5	300	6.49	3.28	3.26	1.97866	69.3963	4.49	4.99	4.62	0.8998	103.512	-2	1.71	1.36	-1.07886	34.1153	-0.308166	0.521341	0.417178
5	300	5.94	3.1	2.76	1.91613	50.8226	4.18	4.3	3.39	0.972093	60.9319	-1.76	1.2	0.63	-0.944036	10.1092	-0.296296	0.387097	0.228261
5	300	7.03	3.61	3.42	1.94737	86.7938	4.31	3.6	3.01	1.19722	46.7032	-2.72	-0.01	-0.41	-0.750146	-40.0906	-0.386913	-0.00277008	-0.119883
5	300	6.71	3.42	3.39	1.96199	77.7944	4.26	4.39	4.4	0.970387	82.2862	-2.45	0.97	1.01	-0.991601	4.49176	-0.365127	0.283626	0.297935

## Sheet: Soybean
Time (h)	Temperature (℃)	Before Carbonization					After Carbonization
		Length (mm)	Width (mm)	Thickness (mm)	L/W ratio	Volume (mm³)	Length (mm)	Width (mm)	Thickness (mm)	L/W ratio	Volume (mm³)	Length variation	Width variation	Thickness variation	L/W ratio variation	Volume variation	Shrinkage of length	Shrinkage of Width	Shrinkage of Thickness
1	240	7.09	6.84	6.01	1.03655	152.53	6.88	6.52	6.19	1.05521	145.313	-0.21	-0.32	0.18	0.018665	-7.21677	-0.0296192	-0.0467836	0.0299501
1	240	7.07	7.34	7.07	0.963215	192.005	7.74	6.87	6.17	1.12664	171.696	0.67	-0.47	-0.9	0.163422	-20.3089	0.0947666	-0.0640327	-0.127298
1	240	6.8	5.65	4.94	1.20354	99.3259	7.35	6.53	6.3	1.12557	158.241	0.55	0.88	1.36	-0.0779656	58.9152	0.0808824	0.155752	0.275304
1	240	6.71	6.06	5.59	1.10726	118.956	6.99	6.53	5.46	1.07044	130.425	0.28	0.47	-0.13	-0.0368166	11.4694	0.0417288	0.0775578	-0.0232558
1	240	7.18	6.96	5.84	1.03161	152.73	7.68	6.97	6.42	1.10187	179.849	0.5	0.01	0.58	0.0702559	27.1185	0.0696379	0.00143678	0.0993151
1	240	6.7	6.84	6.32	0.979532	151.575	7.28	6.86	6.41	1.06122	167.53	0.58	0.02	0.09	0.0816923	15.9552	0.0865672	0.00292398	0.0142405
1	240	6.41	6.06	4.96	1.05776	100.83	7.26	7.14	7.02	1.01681	190.437	0.85	1.08	2.06	-0.0409491	89.6063	0.132605	0.178218	0.415323
1	240	6.5	6.29	5.52	1.03339	118.109	7.02	6.67	6.25	1.05247	153.152	0.52	0.38	0.73	0.0190874	35.0429	0.08	0.0604134	0.132246
1	240	6.3	6.33	5.56	0.995261	116.037	7.22	5.91	5.07	1.22166	113.217	0.92	-0.42	-0.49	0.226398	-2.82041	0.146032	-0.0663507	-0.0881295
1	240	7.27	6.57	5.9	1.10654	147.479	6.52	6.18	5.68	1.05502	119.774	-0.75	-0.39	-0.22	-0.0515287	-27.7049	-0.103164	-0.0593607	-0.0372881
1	240	7.09	6.58	6.29	1.07751	153.568	6.67	6.29	5.66	1.06041	124.271	-0.42	-0.29	-0.63	-0.0170942	-29.2967	-0.0592384	-0.0440729	-0.100159
1	240	7.34	7.24	6.57	1.01381	182.717	7.3	6.81	5.85	1.07195	152.196	-0.04	-0.43	-0.72	0.0581409	-30.5204	-0.00544959	-0.0593923	-0.109589
1	240	6.32	6.05	5.24	1.04463	104.853	7.26	6.58	5.57	1.10334	139.25	0.94	0.53	0.33	0.0587154	34.397	0.148734	0.0876033	0.0629771
1	240	6.76	6.66	5.89	1.01502	138.776	6.76	5.96	4.83	1.13423	101.84	0	-0.7	-1.06	0.119213	-36.9361	0	-0.105105	-0.179966
1	240	6.8	6.01	5.19	1.13145	111.002	7.4	6.46	5.84	1.14551	146.102	0.6	0.45	0.65	0.0140632	35.1002	0.0882353	0.0748752	0.125241
1	240	6.78	6.65	6.27	1.01955	147.944	6.9	5.86	5.16	1.17747	109.188	0.12	-0.79	-1.11	0.157926	-38.756	0.0176991	-0.118797	-0.177033
1	240	7.11	6.82	5.49	1.04252	139.317	7.05	6.86	6.03	1.0277	152.619	-0.06	0.04	0.54	-0.0148252	13.3019	-0.00843882	0.0058651	0.0983607
1	240	6.98	7.13	6.44	0.978962	167.729	7.13	5.67	4.58	1.2575	96.8984	0.15	-1.46	-1.86	0.278533	-70.831	0.02149	-0.204769	-0.28882
1	240	6.42	6.38	5.75	1.00627	123.254	6.81	6.39	5.38	1.06573	122.52	0.39	0.01	-0.37	0.0594581	-0.733796	0.0607477	0.0015674	-0.0643478
1	240	7.5	7.1	6.3	1.05634	175.565	N/A	N/A	N/A
3	240	6.41	6.06	4.98	1.05776	101.237	7.25	5.92	6.03	1.22466	135.443	0.84	-0.14	1.05	0.166906	34.2058	0.131045	-0.0231023	0.210843
3	240	6.87	6.85	6.14	1.00292	151.215	8.06	7.02	6.42	1.14815	190.102	1.19	0.17	0.28	0.145228	38.8868	0.173217	0.0248175	0.0456026
3	240	6.96	6.94	6.26	1.00288	158.242	7.48	6.3	5.95	1.1873	146.736	0.52	-0.64	-0.31	0.18442	-11.5056	0.0747126	-0.092219	-0.0495208
3	240	6.72	7.15	6.7	0.93986	168.472	7.17	6.69	5.78	1.07175	145.095	0.45	-0.46	-0.92	0.131889	-23.3776	0.0669643	-0.0643357	-0.137313
3	240	7.29	7.09	6.16	1.02821	166.622	7.45	6.47	0.99	1.15147	24.9732	0.16	-0.62	-5.17	0.12326	-141.649	0.0219479	-0.0874471	-0.839286
3	240	7.05	6.95	6.27	1.01439	160.775	6.74	6.48	5.8	1.04012	132.569	-0.31	-0.47	-0.47	0.025735	-28.2067	-0.0439716	-0.0676259	-0.0749601
3	240	5.91	6.28	5.62	0.941083	109.16	6.66	6.7	6.08	0.99403	141.981	0.75	0.42	0.46	0.052947	32.8217	0.126904	0.066879	0.0818505
3	240	6.32	6.3	5.65	1.00317	117.729	7.17	6.4	6.09	1.12031	146.25	0.85	0.1	0.44	0.117138	28.5204	0.134494	0.015873	0.0778761
3	240	6.95	6.58	5.86	1.05623	140.245	7.19	6.6	5.94	1.08939	147.516	0.24	0.02	0.08	0.0331629	7.27072	0.0345324	0.00303951	0.0136519
3	240	6.68	5.94	5.07	1.12458	105.281	6.85	6.27	5.44	1.0925	122.274	0.17	0.33	0.37	-0.0320751	16.9935	0.0254491	0.0555556	0.0729783
3	240	7.02	6.94	6.17	1.01153	157.311	6.93	6.7	6.24	1.03433	151.625	-0.09	-0.24	0.07	0.022801	-5.68631	-0.0128205	-0.0345821	0.0113452
3	240	7.29	6.81	5.91	1.07048	153.547	6.72	5.39	4.99	1.24675	94.5882	-0.57	-1.42	-0.92	0.176269	-58.9585	-0.0781893	-0.208517	-0.155668
3	240	6.49	6.64	6	0.97741	135.314	7.29	6.41	5.62	1.13729	137.436	0.8	-0.23	-0.38	0.159876	2.12202	0.123267	-0.0346386	-0.0633333
3	240	8.03	7.55	6.69	1.06358	212.259	6.86	6.17	5.42	1.11183	120.057	-1.17	-1.38	-1.27	0.0482553	-92.2026	-0.145704	-0.182781	-0.189836
3	240	6.74	6.48	5.33	1.04012	121.826	6.77	6.07	5.65	1.11532	121.508	0.03	-0.41	0.32	0.0751978	-0.318334	0.00445104	-0.0632716	0.0600375
3	240	6.76	6.84	6.61	0.988304	159.949	6.38	6.26	5.67	1.01917	118.51	-0.38	-0.58	-0.94	0.0308652	-41.439	-0.056213	-0.0847953	-0.142209
3	240	6.82	7.08	6.69	0.963277	169.053	6.23	5.94	4.68	1.04882	90.6356	-0.59	-1.14	-2.01	0.0855447	-78.4171	-0.0865103	-0.161017	-0.300448
3	240	6.69	6.65	5.87	1.00602	136.667	6.84	6.72	6.18	1.01786	148.659	0.15	0.07	0.31	0.0118421	11.9922	0.0224215	0.0105263	0.0528109
3	240	7.33	7.04	6.19	1.04119	167.165	6.17	6.18	5.29	0.998382	105.562	-1.16	-0.86	-0.9	-0.0428113	-61.6031	-0.158254	-0.122159	-0.145396
3	240	6.76	6.66	5.57	1.01502	131.236	5.9	6.24	5.36	0.945513	103.271	-0.86	-0.42	-0.21	-0.0695022	-27.9651	-0.127219	-0.0630631	-0.037702
5	240	7.4	6.69	5.92	1.10613	153.376	7.47	6.37	5.66	1.17268	140.947	0.07	-0.32	-0.26	0.0665559	-12.4295	0.00945946	-0.0478326	-0.0439189
5	240	7.21	6.46	5.87	1.1161	143.082	7.03	6.8	5.51	1.03382	137.846	-0.18	0.34	-0.36	-0.0822755	-5.23574	-0.0249653	0.0526316	-0.0613288
5	240	7.14	6.9	6.26	1.03478	161.399	7.68	6.89	5.42	1.11466	150.092	0.54	-0.01	-0.84	0.0798763	-11.3065	0.0756303	-0.00144928	-0.134185
5	240	6.82	6.75	6.21	1.01037	149.609	6.12	5.78	5.14	1.05882	95.1526	-0.7	-0.97	-1.07	0.0484532	-54.4565	-0.102639	-0.143704	-0.172303
5	240	6.46	6.68	6.27	0.967066	141.597	7.33	6.37	5.84	1.15071	142.704	0.87	-0.31	-0.43	0.183641	1.10623	0.134675	-0.0464072	-0.0685805
5	240	6.65	6.42	6.05	1.03583	135.173	6.72	6.24	5.63	1.07692	123.549	0.07	-0.18	-0.42	0.0410975	-11.6237	0.0105263	-0.0280374	-0.0694215
5	240	6.42	6.03	5.61	1.06468	113.656	6.78	6.32	6.02	1.07278	134.996	0.36	0.29	0.41	0.00810819	21.3399	0.0560748	0.0480929	0.0730838
5	240	6.47	6.48	5.69	0.998457	124.845	6.72	6.23	5.9	1.07865	129.267	0.25	-0.25	0.21	0.0801949	4.42236	0.0386399	-0.0385802	0.0369069
5	240	6.69	6.84	6.11	0.97807	146.319	6.46	6.3	5.88	1.0254	125.236	-0.23	-0.54	-0.23	0.0473266	-21.0835	-0.0343797	-0.0789474	-0.0376432
5	240	5.66	6	4.97	0.943333	88.3288	6.55	6.28	5.86	1.04299	126.147	0.89	0.28	0.89	0.0996603	37.8182	0.157244	0.0466667	0.179074
5	240	6.79	6.53	6.11	1.03982	141.776	6.56	6.19	5.87	1.05977	124.742	-0.23	-0.34	-0.24	0.0199576	-17.0344	-0.0338733	-0.0520674	-0.0392799
5	240	6	6.04	5.57	0.993377	105.638	6.26	6.26	5.42	1	111.154	0.26	0.22	-0.15	0.00662252	5.51593	0.0433333	0.0364238	-0.02693
5	240	6.92	6.86	5.84	1.00875	145.085	6.28	5.92	5.17	1.06081	100.589	-0.64	-0.94	-0.67	0.0520645	-44.4957	-0.0924855	-0.137026	-0.114726
5	240	6.03	6.11	5.36	0.986907	103.348	6.61	6.01	5.13	1.09983	106.653	0.58	-0.1	-0.23	0.112927	3.30475	0.0961857	-0.0163666	-0.0429104
5	240	6.88	6.74	6.37	1.02077	154.585	6.5	5.97	5.34	1.08878	108.444	-0.38	-0.77	-1.03	0.0680057	-46.1401	-0.0552326	-0.114243	-0.161695
5	240	6.13	6.43	5.78	0.953344	119.228	6.41	6.38	5.59	1.0047	119.638	0.28	-0.05	-0.19	0.0513585	0.410094	0.045677	-0.00777605	-0.032872
5	240	6.41	6.22	5.41	1.03055	112.882	6.07	6.05	4.98	1.00331	95.7088	-0.34	-0.17	-0.43	-0.0272408	-17.1731	-0.0530421	-0.0273312	-0.0794824
5	240	6.35	6.55	5.97	0.969466	129.947	5.84	5.98	4.65	0.976589	84.9856	-0.51	-0.57	-1.32	0.00712298	-44.9618	-0.080315	-0.0870229	-0.221106
5	240	6.55	6.54	6.03	1.00153	135.181	6.04	5.91	5.51	1.022	102.933	-0.51	-0.63	-0.52	0.0204676	-32.2478	-0.0778626	-0.0963303	-0.0862355
5	240	6.04	6.03	5.39	1.00166	102.736	6.16	5.87	5.06	1.0494	95.752	0.12	-0.16	-0.33	0.0477454	-6.98373	0.0198675	-0.026534	-0.0612245
1	250	7.89	7.49	6.24	1.0534	192.984	7.19	6.91	6.2	1.04052	161.204	-0.7	-0.58	-0.04	-0.0128836	-31.7798	-0.0887199	-0.0774366	-0.00641026
1	250	7.38	7.1	6.35	1.03944	174.127	7.16	6.59	6.07	1.08649	149.888	-0.22	-0.51	-0.28	0.0470581	-24.2397	-0.0298103	-0.071831	-0.0440945
1	250	6.44	6.22	5.38	1.03537	112.781	7.63	7.18	6.52	1.06267	186.928	1.19	0.96	1.14	0.0273043	74.147	0.184783	0.154341	0.211896
1	250	7.53	6.65	6.22	1.13233	162.999	7.92	6.8	6.29	1.16471	177.281	0.39	0.15	0.07	0.0323751	14.2822	0.0517928	0.0225564	0.011254
1	250	6.78	6.55	6	1.03511	139.444	6.92	6.61	6.17	1.0469	147.697	0.14	0.06	0.17	0.0117841	8.25255	0.020649	0.00916031	0.0283333
1	250	7.21	7.1	6.24	1.01549	167.169	7.06	6.51	5.73	1.08449	137.822	-0.15	-0.59	-0.51	0.0689924	-29.3473	-0.0208044	-0.0830986	-0.0817308
1	250	7.73	6.87	6.52	1.12518	181.202	6.88	6.76	6.37	1.01775	155.043	-0.85	-0.11	-0.15	-0.10743	-26.1584	-0.109961	-0.0160116	-0.0230061
1	250	6.87	6.96	6.52	0.987069	163.152	7.94	7.48	6.24	1.0615	193.948	1.07	0.52	-0.28	0.0744284	30.7961	0.15575	0.0747126	-0.0429448
1	250	6.72	6.1	5.6	1.10164	120.134	6.49	5.95	5.76	1.09076	116.403	-0.23	-0.15	0.16	-0.010883	-3.73132	-0.0342262	-0.0245902	0.0285714
1	250	7.08	6.97	6.14	1.01578	158.567	6.99	6.78	6.49	1.03097	160.964	-0.09	-0.19	0.35	0.0151915	2.39745	-0.0127119	-0.0272597	0.0570033
1	250	7.1	6.61	6.23	1.07413	153.012	7.88	6.58	6.02	1.19757	163.353	0.78	-0.03	-0.21	0.123438	10.3407	0.109859	-0.00453858	-0.0337079
1	250	7.01	6.71	5.98	1.04471	147.204	6.56	6.44	5.79	1.01863	128.011	-0.45	-0.27	-0.19	-0.0260758	-19.1934	-0.064194	-0.0402385	-0.0317726
1	250	6.59	6.73	5.82	0.979198	135.083	7.4	6.24	5.48	1.1859	132.427	0.81	-0.49	-0.34	0.2067	-2.65675	0.122914	-0.0728083	-0.0584192
1	250	7.68	7.4	6.6	1.03784	196.298	7.51	6.65	6.2	1.12932	162.044	-0.17	-0.75	-0.4	0.0914855	-34.2542	-0.0221354	-0.101351	-0.0606061
1	250	6.47	6.48	5.81	0.998457	127.478	6.8	6.55	6.09	1.03817	141.953	0.33	0.07	0.28	0.0397111	14.4759	0.0510046	0.0108025	0.0481928
1	250	7.61	7.15	6.6	1.06434	187.937	6.99	6.52	6.07	1.07209	144.774	-0.62	-0.63	-0.53	0.00775023	-43.1629	-0.0814717	-0.0881119	-0.080303
1	250	6.62	6.11	5.7	1.08347	120.657	6.96	6.4	6.11	1.0875	142.432	0.34	0.29	0.41	0.00403028	21.7754	0.0513595	0.0474632	0.0719298
1	250	6.93	6.8	6.37	1.01912	157.094	6.74	6.04	5.22	1.11589	111.21	-0.19	-0.76	-1.15	0.0967764	-45.8837	-0.027417	-0.111765	-0.180534
1	250	6.57	6.36	5.66	1.03302	123.771	7.68	6.8	6.68	1.12941	182.568	1.11	0.44	1.02	0.0963929	58.7976	0.16895	0.0691824	0.180212
1	250	6.76	6.51	6.14	1.0384	141.408	6.89	6.76	5.68	1.01923	138.45	0.13	0.25	-0.46	-0.0191717	-2.95825	0.0192308	0.0384025	-0.0749186
3	250	6.97	6.46	6.85	1.07895	161.411	6.85	6.18	5.48	1.10841	121.405	-0.12	-0.28	-1.37	0.0294669	-40.006	-0.0172166	-0.0433437	-0.2
3	250	6.84	6.11	6.63	1.11948	145.007	6.7	6.36	5.66	1.05346	126.22	-0.14	0.25	-0.97	-0.0660171	-18.7875	-0.0204678	0.0409165	-0.146305
3	250	7.59	6.55	7.2	1.15878	187.324	6.98	6.06	6.08	1.15182	134.589	-0.61	-0.49	-1.12	-0.00696344	-52.7351	-0.0803689	-0.0748092	-0.155556
3	250	7.87	5.93	7.1	1.32715	173.407	8.27	6.18	5.56	1.33819	148.712	0.4	0.25	-1.54	0.0110376	-24.6944	0.0508259	0.0421585	-0.216901
3	250	7.12	6.55	7	1.08702	170.843	7.22	6.32	5.62	1.14241	134.205	0.1	-0.23	-1.38	0.0553822	-36.6381	0.0140449	-0.0351145	-0.197143
3	250	7.24	6.65	7.09	1.08872	178.643	7.72	6.7	5.96	1.15224	161.331	0.48	0.05	-1.13	0.063517	-17.3119	0.0662983	0.0075188	-0.159379
3	250	6.89	6.35	6.88	1.08504	157.529	7.18	6.32	6.18	1.13608	146.76	0.29	-0.03	-0.7	0.0510366	-10.7685	0.04209	-0.00472441	-0.101744
3	250	6.93	5.74	6.32	1.20732	131.565	7.02	6.18	5.85	1.13592	132.819	0.09	0.44	-0.47	-0.0713947	1.25382	0.012987	0.0766551	-0.0743671
3	250	7.18	6.08	6.99	1.18092	159.692	6.99	6.49	6	1.07704	142.446	-0.19	0.41	-0.99	-0.103879	-17.2457	-0.0264624	0.0674342	-0.141631
3	250	6.99	6.04	6.4	1.15728	141.408	7.51	6.5	6.37	1.15538	162.731	0.52	0.46	-0.03	-0.00190015	21.3238	0.074392	0.0761589	-0.0046875
3	250	6.97	6.21	7.08	1.12238	160.375	7.14	6.31	5.99	1.13154	141.232	0.17	0.1	-1.09	0.00915399	-19.1429	0.0243902	0.0161031	-0.153955
3	250	6.9	5.92	6.52	1.16554	139.379	6.84	6.24	5.97	1.09615	133.35	-0.06	0.32	-0.55	-0.0693867	-6.0287	-0.00869565	0.0540541	-0.0843558
3	250	6.9	6.31	6.98	1.0935	159.042	7.33	6.72	6.44	1.09077	166.011	0.43	0.41	-0.54	-0.00272857	6.96909	0.0623188	0.0649762	-0.0773639
3	250	6.96	5.51	6.62	1.26316	132.861	7.11	6.28	5.52	1.13217	128.987	0.15	0.77	-1.1	-0.130992	-3.87368	0.0215517	0.139746	-0.166163
3	250	6.79	6.17	6.51	1.10049	142.73	6.89	6.21	5.7	1.1095	127.633	0.1	0.04	-0.81	0.00901458	-15.0964	0.0147275	0.00648298	-0.124424
3	250	6.55	5.9	6.6	1.11017	133.48	6.87	6.17	5.65	1.11345	125.334	0.32	0.27	-0.95	0.0032827	-8.14587	0.048855	0.0457627	-0.143939
3	250	6.76	6.02	6.78	1.12292	144.395	6.49	6.08	5.61	1.06743	115.848	-0.27	0.06	-1.17	-0.0554894	-28.5464	-0.0399408	0.00996678	-0.172566
3	250	6.8	5.87	6.82	1.15843	142.466	7.09	5.99	5.39	1.18364	119.795	0.29	0.12	-1.43	0.0252067	-22.6701	0.0426471	0.0204429	-0.209677
3	250	6.58	5.93	6.6	1.10961	134.773	6.49	6.53	6.21	0.993874	137.73	-0.09	0.6	-0.39	-0.115738	2.95678	-0.0136778	0.10118	-0.0590909
3	250	6.89	6.08	6.87	1.13322	150.611	6.89	6.34	5.71	1.08675	130.534	0	0.26	-1.16	-0.0464729	-20.0776	0	0.0427632	-0.16885
5	250	6.57	6.25	5.9	1.0512	126.787	6.89	5.64	5.17	1.22163	105.14	0.32	-0.61	-0.73	0.170431	-21.6475	0.0487062	-0.0976	-0.123729
5	250	6.45	6.44	5.85	1.00155	127.169	7.35	6.22	5.4	1.18167	129.196	0.9	-0.22	-0.45	0.180119	2.02766	0.139535	-0.0341615	-0.0769231
5	250	7.07	6.8	5.91	1.03971	148.694	6.92	6.07	5.37	1.14003	118.045	-0.15	-0.73	-0.54	0.100327	-30.6493	-0.0212164	-0.107353	-0.0913706
5	250	6.92	6.82	6.46	1.01466	159.552	7.52	6.23	5.4	1.20706	132.397	0.6	-0.59	-1.06	0.1924	-27.1547	0.0867052	-0.0865103	-0.164087
5	250	6.66	6.78	5.81	0.982301	137.296	6.41	5.52	5.55	1.16123	102.771	-0.25	-1.26	-0.26	0.178931	-34.5257	-0.0375375	-0.185841	-0.0447504
5	250	6.48	6.45	6.01	1.00465	131.458	6.55	6.02	5.6	1.08804	115.559	0.07	-0.43	-0.41	0.0833887	-15.8991	0.0108025	-0.0666667	-0.0682196
5	250	7.03	6.75	5.8	1.04148	144.034	6.47	6.06	5.21	1.06766	106.904	-0.56	-0.69	-0.59	0.0261753	-37.1304	-0.0796586	-0.102222	-0.101724
5	250	6.44	6.22	5.34	1.03537	111.943	7.21	6.12	5.48	1.1781	126.545	0.77	-0.1	0.14	0.142735	14.6025	0.119565	-0.0160772	0.0262172
5	250	6.09	6.11	5.15	0.996727	100.287	6.21	5.62	5.07	1.10498	92.6007	0.12	-0.49	-0.08	0.108256	-7.68618	0.0197044	-0.0801964	-0.015534
5	250	6.61	6.28	5.38	1.05255	116.875	6.61	6.01	5	1.09983	103.95	0	-0.27	-0.38	0.0472858	-12.9251	0	-0.0429936	-0.070632
5	250	6.65	6.2	5.45	1.07258	117.595	6.82	6.45	6.05	1.05736	139.277	0.17	0.25	0.6	-0.0152163	21.6817	0.0255639	0.0403226	0.110092
5	250	7.3	6.86	6.05	1.06414	158.555	6.58	6.17	5.17	1.06645	109.845	-0.72	-0.69	-0.88	0.00231063	-48.7104	-0.0986301	-0.100583	-0.145455
5	250	6.88	7.18	6.71	0.958217	173.466	6.54	6.03	5.64	1.08458	116.4	-0.34	-1.15	-1.07	0.12636	-57.0659	-0.0494186	-0.160167	-0.159463
5	250	7.28	7.16	6.38	1.01676	174.038	7.25	6.67	5.94	1.08696	150.324	-0.03	-0.49	-0.44	0.0701967	-23.7136	-0.00412088	-0.0684358	-0.0689655
5	250	6.06	6.07	5.45	0.998353	104.915	6.24	5.6	5.41	1.11429	98.9346	0.18	-0.47	-0.04	0.115933	-5.98005	0.029703	-0.07743	-0.00733945
5	250	6.74	6.57	5.81	1.02588	134.642	6.85	6.6	6.17	1.03788	145.982	0.11	0.03	0.36	0.0120036	11.3398	0.0163205	0.00456621	0.0619621
5	250	6.42	6.46	5.88	0.993808	127.621	6.53	5.55	5.12	1.17658	97.1079	0.11	-0.91	-0.76	0.182769	-30.5134	0.017134	-0.140867	-0.129252
5	250	6.67	6.75	6.32	0.988148	148.91	7.58	6.41	5.38	1.18253	136.801	0.91	-0.34	-0.94	0.194379	-12.1098	0.136432	-0.0503704	-0.148734
5	250	7.48	6.38	5.76	1.17241	143.854	6.83	6.38	5.32	1.07053	121.32	-0.65	0	-0.44	-0.101881	-22.5347	-0.0868984	0	-0.0763889
5	250	6.7	6.46	5.49	1.03715	124.354	6.75	6.32	5.75	1.06804	128.371	0.05	-0.14	0.26	0.0308863	4.01754	0.00746269	-0.0216718	0.0473588
1	260	7.67	7.13	6.3	1.07574	180.303	7.65	7	6.04	1.09286	169.268	-0.02	-0.13	-0.26	0.0171208	-11.0354	-0.00260756	-0.0182328	-0.0412698
1	260	7.38	7.43	6.44	0.993271	184.803	7.07	6.89	5.86	1.02612	149.388	-0.31	-0.54	-0.58	0.0328543	-35.4155	-0.0420054	-0.0726783	-0.0900621
1	260	7.35	6.96	6.56	1.05603	175.622	7.18	6.57	5.9	1.09285	145.653	-0.17	-0.39	-0.66	0.0368118	-29.9687	-0.0231293	-0.0560345	-0.10061
1	260	6.74	6.9	6.35	0.976812	154.547	7.99	6.59	5.38	1.21244	148.249	1.25	-0.31	-0.97	0.235632	-6.29782	0.18546	-0.0449275	-0.152756
1	260	8.44	7.39	6.55	1.14208	213.799	6.8	6.61	6.07	1.02874	142.783	-1.64	-0.78	-0.48	-0.11334	-71.0161	-0.194313	-0.105548	-0.0732824
1	260	7.4	6.86	6.15	1.07872	163.384	7.05	6.71	5.67	1.05067	140.37	-0.35	-0.15	-0.48	-0.0280466	-23.0143	-0.0472973	-0.0218659	-0.0780488
1	260	7.17	7.32	6.37	0.979508	174.964	6.59	6.1	5.78	1.08033	121.597	-0.58	-1.22	-0.59	0.10082	-53.3671	-0.0808926	-0.166667	-0.0926217
1	260	7.38	6.41	5.79	1.15133	143.341	7.14	6.63	5.61	1.07692	138.98	-0.24	0.22	-0.18	-0.074403	-4.36108	-0.0325203	0.0343214	-0.0310881
1	260	6.87	6.74	5.86	1.01929	142.001	7.59	6.55	5.97	1.15878	155.323	0.72	-0.19	0.11	0.139491	13.3216	0.104803	-0.0281899	0.0187713
1	260	7.51	7.31	6.42	1.02736	184.447	6.5	6.32	5.48	1.02848	117.812	-1.01	-0.99	-0.94	0.00112123	-66.6347	-0.134487	-0.135431	-0.146417
1	260	6.99	6.55	5.99	1.06718	143.524	7.85	7.27	6.37	1.07978	190.249	0.86	0.72	0.38	0.0126043	46.7251	0.123033	0.109924	0.0634391
1	260	7.48	7.34	6.86	1.01907	197.106	7.38	7.16	6.2	1.03073	171.451	-0.1	-0.18	-0.66	0.0116527	-25.6554	-0.013369	-0.0245232	-0.0962099
1	260	6.96	6.65	5.89	1.04662	142.667	7.47	7.05	6.18	1.05957	170.324	0.51	0.4	0.29	0.0129579	27.6569	0.0732759	0.0601504	0.049236
1	260	7.07	6.61	6.15	1.06959	150.409	8.18	7.24	5.9	1.12983	182.862	1.11	0.63	-0.25	0.0602427	32.4523	0.157001	0.0953101	-0.0406504
1	260	6.58	6.54	5.78	1.00612	130.17	8.6	7.21	6.51	1.19279	211.248	2.02	0.67	0.73	0.186672	81.0785	0.306991	0.102446	0.126298
1	260	7	6.66	5.81	1.05105	141.751	7.08	6.46	5.7	1.09598	136.433	0.08	-0.2	-0.11	0.0449242	-5.31834	0.0114286	-0.03003	-0.0189329
1	260	6.67	6.7	6.25	0.995522	146.17	7.34	6.33	5.85	1.15956	142.244	0.67	-0.37	-0.4	0.164035	-3.92625	0.10045	-0.0552239	-0.064
1	260	7.04	7.12	6.1	0.988764	160.015	6.66	6.64	6.17	1.00301	142.793	-0.38	-0.48	0.07	0.014248	-17.2224	-0.0539773	-0.0674157	0.0114754
1	260	7.09	6.81	5.88	1.04112	148.576	7.2	6.47	5.92	1.11283	144.323	0.11	-0.34	0.04	0.0717124	-4.2527	0.0155148	-0.0499266	0.00680272
1	260	6.85	6.74	5.95	1.01632	143.763	7.46	6.84	6.44	1.09064	171.973	0.61	0.1	0.49	0.0743228	28.21	0.0890511	0.0148368	0.0823529
3	260	7.1	6.97	5.92	1.01865	153.317	6.72	6	5.46	1.12	115.21	-0.38	-0.97	-0.46	0.101349	-38.107	-0.0535211	-0.139168	-0.0777027
3	260	7.03	7.07	6.48	0.994342	168.55	6.49	5.88	5.21	1.10374	104.049	-0.54	-1.19	-1.27	0.109399	-64.5007	-0.0768137	-0.168317	-0.195988
3	260	6.89	6.58	6.35	1.04711	150.66	6.73	5.98	5.97	1.12542	125.739	-0.16	-0.6	-0.38	0.0783056	-24.921	-0.0232221	-0.0911854	-0.0598425
3	260	6.69	6.69	6.18	1	144.75	7.02	6.59	5.87	1.06525	142.115	0.33	-0.1	-0.31	0.0652504	-2.63547	0.0493274	-0.0149477	-0.0501618
3	260	7.14	7.22	6.64	0.98892	179.136	7.84	6.74	6.37	1.1632	176.155	0.7	-0.48	-0.27	0.174285	-2.98107	0.0980392	-0.066482	-0.0406627
3	260	7.37	7.52	6.83	0.980053	198.1	6.94	6.45	5.86	1.07597	137.276	-0.43	-1.07	-0.97	0.0959158	-60.8238	-0.0583446	-0.142287	-0.14202
3	260	6.28	6.38	5.69	0.984326	119.308	6.91	6.1	5.53	1.13279	121.986	0.63	-0.28	-0.16	0.148461	2.67801	0.100318	-0.0438871	-0.0281195
3	260	6.67	6.79	5.98	0.982327	141.734	7.44	5.9	5.07	1.26102	116.469	0.77	-0.89	-0.91	0.27869	-25.2651	0.115442	-0.131075	-0.152174
3	260	6.9	6.78	6.12	1.0177	149.833	7.12	5.81	5.76	1.22547	124.697	0.22	-0.97	-0.36	0.207774	-25.1361	0.0318841	-0.143068	-0.0588235
3	260	7	6.71	6.19	1.04322	152.156	6.85	6.19	5.71	1.10662	126.706	-0.15	-0.52	-0.48	0.0634045	-25.4506	-0.0214286	-0.0774963	-0.0775444
3	260	6.59	5.85	4.94	1.1265	99.6659	6.71	5.92	5.56	1.13345	115.584	0.12	0.07	0.62	0.00695022	15.918	0.0182094	0.0119658	0.125506
3	260	6.66	6.62	5.81	1.00604	134.056	7.03	6.11	5.83	1.15057	131.052	0.37	-0.51	0.02	0.144531	-3.0042	0.0555556	-0.0770393	0.00344234
3	260	6.77	6.72	6.15	1.00744	146.424	6.72	5.77	5.27	1.16464	106.939	-0.05	-0.95	-0.88	0.157204	-39.4852	-0.00738552	-0.141369	-0.143089
3	260	6.6	6.73	6.35	0.980684	147.608	6.88	5.97	5.88	1.15243	126.392	0.28	-0.76	-0.47	0.171745	-21.2167	0.0424242	-0.112927	-0.0740157
3	260	6.6	6.59	5.53	1.00152	125.873	6.83	5.37	4.75	1.27188	91.1732	0.23	-1.22	-0.78	0.270363	-34.6999	0.0348485	-0.185129	-0.141049
3	260	7.18	6.97	6.43	1.03013	168.402	7.22	6.27	5.89	1.15152	139.54	0.04	-0.7	-0.54	0.121386	-28.8618	0.00557103	-0.10043	-0.0839813
3	260	6.65	6.59	5.97	1.0091	136.918	6.96	5.89	5.38	1.18166	115.421	0.31	-0.7	-0.59	0.172559	-21.4967	0.0466165	-0.106222	-0.0988275
3	260	6.6	7.06	6.6	0.934844	160.943	7.48	6.51	6	1.149	152.902	0.88	-0.55	-0.6	0.214157	-8.04091	0.133333	-0.0779037	-0.0909091
3	260	6.57	6.4	5.76	1.02656	126.749	7.7	5.76	5.65	1.33681	131.141	1.13	-0.64	-0.11	0.310243	4.39198	0.171994	-0.1	-0.0190972
3	260	6.63	6.91	6.41	0.959479	153.684	7.68	6.53	7.31	1.17611	191.854	1.05	-0.38	0.9	0.216631	38.1699	0.158371	-0.0549928	0.140406
5	260	6.19	6.19	5.81	1	116.503	6.14	5.93	5	1.03541	95.2734	-0.05	-0.26	-0.81	0.0354132	-21.2293	-0.00807754	-0.0420032	-0.139415
5	260	6.85	6.28	5.81	1.09076	130.799	7.35	6.54	6.31	1.12385	158.735	0.5	0.26	0.5	0.0330889	27.936	0.0729927	0.0414013	0.0860585
5	260	6.63	6.6	5.53	1.00455	126.637	7.27	6.28	5.04	1.15764	120.421	0.64	-0.32	-0.49	0.153098	-6.2159	0.0965309	-0.0484848	-0.0886076
5	260	7.09	6.89	6.29	1.02903	160.803	6.94	5.95	5.37	1.16639	116.046	-0.15	-0.94	-0.92	0.137359	-44.7574	-0.0211566	-0.13643	-0.146264
5	260	6.28	6.28	5.38	1	111.04	6.77	5.9	5.23	1.14746	109.325	0.49	-0.38	-0.15	0.147458	-1.71481	0.0780255	-0.0605096	-0.027881
5	260	6.96	7.24	6.8	0.961326	179.323	6.52	5.93	5.6	1.09949	113.31	-0.44	-1.31	-1.2	0.138168	-66.0125	-0.0632184	-0.180939	-0.176471
5	260	6.4	6.25	5.63	1.024	117.855	7.08	6.76	5.73	1.04734	143.52	0.68	0.51	0.1	0.0233373	25.6655	0.10625	0.0816	0.017762
5	260	6.98	6.89	6.37	1.01306	160.322	6.99	5.74	5.27	1.21777	110.657	0.01	-1.15	-1.1	0.204708	-49.665	0.00143266	-0.166909	-0.172684
5	260	7.16	7.16	6.61	1	177.34	6.45	5.52	5.13	1.16848	95.5861	-0.71	-1.64	-1.48	0.168478	-81.7536	-0.099162	-0.22905	-0.223903
5	260	7.22	6.61	5.27	1.09228	131.622	7.91	6.61	6.11	1.19667	167.185	0.69	0	0.84	0.104387	35.5633	0.0955679	0	0.159393
5	260	8.08	7.38	6.58	1.09485	205.339	6.78	6.41	6.38	1.05772	145.106	-1.3	-0.97	-0.2	-0.0371286	-60.2328	-0.160891	-0.131436	-0.0303951
5	260	6.68	6.44	5.54	1.03727	124.724	7.83	6.78	5.3	1.15487	147.247	1.15	0.34	-0.24	0.1176	22.5226	0.172156	0.052795	-0.0433213
5	260	7.43	7.1	6.08	1.04648	167.853	7.05	6.31	5.99	1.11727	139.452	-0.38	-0.79	-0.09	0.0707953	-28.4013	-0.051144	-0.111268	-0.0148026
5	260	6.96	6.93	6.56	1.00433	165.586	7.35	6.07	5.05	1.21087	117.909	0.39	-0.86	-1.51	0.206544	-47.6777	0.0560345	-0.124098	-0.230183
5	260	6.31	6.28	5.7	1.00478	118.207	6.98	6.75	5.84	1.03407	143.996	0.67	0.47	0.14	0.029297	25.7893	0.106181	0.0748408	0.0245614
5	260	6.64	6.6	5.73	1.00606	131.415	6.39	5.52	5.2	1.15761	95.989	-0.25	-1.08	-0.53	0.151548	-35.426	-0.0376506	-0.163636	-0.0924956
5	260	6.73	6.58	5.76	1.0228	133.488	7.19	6.44	5.83	1.11646	141.274	0.46	-0.14	0.07	0.0936633	7.78595	0.0683507	-0.0212766	0.0121528
5	260	6.33	6.43	5.67	0.984448	120.775	6.71	5.97	5.41	1.12395	113.416	0.38	-0.46	-0.26	0.139505	-7.35922	0.0600316	-0.0715397	-0.0458554
5	260	6.5	6.72	5.97	0.967262	136.469	6.89	5.5	5.2	1.25273	103.125	0.39	-1.22	-0.77	0.285465	-33.3445	0.06	-0.181548	-0.128978
5	260	6.33	6.34	5.72	0.998423	120.134	6.64	5.9	5.01	1.12542	102.716	0.31	-0.44	-0.71	0.127001	-17.4188	0.0489731	-0.0694006	-0.124126
1	270	6.82	6.72	5.99	1.01488	143.668	7.19	6.72	5.97	1.06994	150.956	0.37	0	-0.02	0.0550595	7.28857	0.0542522	0	-0.0033389
1	270	7.04	6.79	6.06	1.03682	151.598	7.42	6.76	6.01	1.09763	157.762	0.38	-0.03	-0.05	0.0608143	6.16439	0.0539773	-0.00441826	-0.00825083
1	270	7.28	7.11	6.43	1.02391	174.177	6.57	6.35	5.79	1.03465	126.414	-0.71	-0.76	-0.64	0.0107357	-47.7626	-0.0975275	-0.106892	-0.0995334
1	270	6.53	6.61	6.13	0.987897	138.469	7.37	6.81	6.76	1.08223	177.558	0.84	0.2	0.63	0.0943349	39.0885	0.128637	0.0302572	0.102773
1	270	6.9	6.7	6.14	1.02985	148.549	6.84	6.52	6.04	1.04908	140.968	-0.06	-0.18	-0.1	0.019229	-7.58181	-0.00869565	-0.0268657	-0.0162866
1	270	6.72	6.23	5.53	1.07865	121.16	7.8	6.82	6.43	1.1437	179.006	1.08	0.59	0.9	0.0650433	57.8459	0.160714	0.094703	0.162749
1	270	7.26	7.17	7.11	1.01255	193.688	6.77	6.54	6.02	1.03517	139.489	-0.49	-0.63	-1.09	0.0226159	-54.199	-0.0674931	-0.0878661	-0.153305
1	270	6.7	6.7	6.26	1	147.063	7.28	6.29	5.78	1.15739	138.512	0.58	-0.41	-0.48	0.157393	-8.55036	0.0865672	-0.061194	-0.0766773
1	270	6.98	6.82	6.14	1.02346	152.963	7.05	5.82	5.46	1.21134	117.242	0.07	-1	-0.68	0.18788	-35.7211	0.0100287	-0.146628	-0.110749
1	270	6.82	6.43	5.77	1.06065	132.419	6.74	6.18	5.82	1.09061	126.867	-0.08	-0.25	0.05	0.0299617	-5.55146	-0.0117302	-0.0388802	0.00866551
1	270	8.04	7.37	6.59	1.09091	204.356	6.73	6.17	5.45	1.09076	118.434	-1.31	-1.2	-1.14	-0.000147341	-85.9223	-0.162935	-0.162822	-0.172989
1	270	7.17	6.86	5.92	1.04519	152.385	7.47	6.35	5.57	1.17638	138.27	0.3	-0.51	-0.35	0.131188	-14.1154	0.041841	-0.074344	-0.0591216
1	270	6.72	6.81	6.19	0.986784	148.247	7.18	6.98	6	1.02865	157.365	0.46	0.17	-0.19	0.0418692	9.11866	0.0684524	0.0249633	-0.0306947
1	270	6.77	6.91	6.37	0.97974	155.95	7.21	6.71	5.65	1.07452	143.049	0.44	-0.2	-0.72	0.0947761	-12.9008	0.0649926	-0.0289436	-0.11303
1	270	6.39	6.61	6.24	0.966717	137.932	7.21	6.25	5.95	1.1536	140.317	0.82	-0.36	-0.29	0.186883	2.38503	0.128326	-0.0544629	-0.0464744
1	270	6.6	6.8	6.24	0.970588	146.56	6.65	6.32	5.94	1.05222	130.648	0.05	-0.48	-0.3	0.081627	-15.9119	0.00757576	-0.0705882	-0.0480769
1	270	7.22	6.72	6.02	1.0744	152.856	7.58	6.38	5.46	1.18809	138.185	0.36	-0.34	-0.56	0.113683	-14.6706	0.0498615	-0.0505952	-0.0930233
1	270	6.54	6.41	5.4	1.02028	118.47	6.63	6.37	5.86	1.04082	129.518	0.09	-0.04	0.46	0.0205355	11.0478	0.0137615	-0.00624025	0.0851852
1	270	6.78	6.89	6.33	0.984035	154.75	6.4	6.31	6.1	1.01426	128.919	-0.38	-0.58	-0.23	0.0302282	-25.8309	-0.0560472	-0.08418	-0.0363349
1	270	6.8	6.73	6.14	1.0104	147.052	6.69	6.54	6.04	1.02294	138.299	-0.11	-0.19	-0.1	0.0125346	-8.75288	-0.0161765	-0.0282318	-0.0162866
3	270	7.09	6.65	5.83	1.06617	143.852	8.36	6.74	5.96	1.24036	175.748	1.27	0.09	0.13	0.174191	31.8965	0.179126	0.0135338	0.0222985
3	270	6.95	6.77	6.13	1.02659	150.943	8.38	6.33	6.49	1.32385	180.165	1.43	-0.44	0.36	0.297267	29.2224	0.205755	-0.0649926	0.0587276
3	270	7.13	7.05	6.02	1.01135	158.363	7.84	5.9	5.88	1.32881	142.339	0.71	-1.15	-0.14	0.317466	-16.024	0.0995792	-0.163121	-0.0232558
3	270	6.25	6.41	5.76	0.975039	120.764	8.85	6.7	6.14	1.3209	190.531	2.6	0.29	0.38	0.345857	69.7662	0.416	0.0452418	0.0659722
3	270	7.16	6.36	5.94	1.12579	141.558	8.08	6.22	5.2	1.29904	136.768	0.92	-0.14	-0.74	0.173249	-4.7905	0.128492	-0.0220126	-0.124579
3	270	7.23	7.05	6.53	1.02553	174.188	7.78	6.67	6.48	1.16642	175.978	0.55	-0.38	-0.05	0.140885	1.78988	0.0760719	-0.0539007	-0.00765697
3	270	6.67	6.71	5.86	0.994039	137.254	7.7	6.05	6.02	1.27273	146.764	1.03	-0.66	0.16	0.278689	9.51069	0.154423	-0.0983607	0.0273038
3	270	7.26	6.89	5.74	1.0537	150.261	7.7	6.04	5.06	1.27483	123.156	0.44	-0.85	-0.68	0.221133	-27.1047	0.0606061	-0.123367	-0.118467
3	270	6.82	6.87	6.11	0.992722	149.817	7.11	5.66	5.23	1.25618	110.145	0.29	-1.21	-0.88	0.263462	-39.6715	0.042522	-0.176128	-0.144026
3	270	7.19	7.11	6.36	1.01125	170.151	7.35	6.21	5.82	1.18357	139.021	0.16	-0.9	-0.54	0.172323	-31.1298	0.0222531	-0.126582	-0.0849057
3	270	7.21	7.24	6.5	0.995856	177.568	7.36	6.58	6.8	1.11854	172.342	0.15	-0.66	0.3	0.122685	-5.2264	0.0208044	-0.0911602	0.0461538
3	270	6.75	6.24	5.5	1.08173	121.235	7.6	5.98	6.01	1.2709	142.945	0.85	-0.26	0.51	0.189172	21.7092	0.125926	-0.0416667	0.0927273
3	270	6.91	6.48	5.47	1.06636	128.18	6.96	5.63	5.41	1.23623	110.941	0.05	-0.85	-0.06	0.169876	-17.2382	0.00723589	-0.131173	-0.0109689
3	270	6.97	6.95	6.09	1.00288	154.388	7.59	5.93	5.83	1.27993	137.323	0.62	-1.02	-0.26	0.277055	-17.0649	0.0889527	-0.146763	-0.0426929
3	270	6.84	6.61	6.03	1.0348	142.677	6.89	6.49	6.75	1.06163	157.96	0.05	-0.12	0.72	0.0268375	15.2829	0.00730994	-0.0181543	0.119403
3	270	6.36	6.56	5.98	0.969512	130.569	8.26	6.22	6.01	1.32797	161.593	1.9	-0.34	0.03	0.358462	31.0241	0.298742	-0.0518293	0.00501672
3	270	6.95	7.15	6.7	0.972028	174.238	7.54	6	5.86	1.25667	138.739	0.59	-1.15	-0.84	0.284639	-35.4995	0.0848921	-0.160839	-0.125373
3	270	6.23	6.54	5.87	0.952599	125.165	7.78	6.22	5.71	1.2508	144.605	1.55	-0.32	-0.16	0.298204	19.4406	0.248796	-0.0489297	-0.0272572
3	270	6.53	6.67	5.96	0.97901	135.851	7.89	6.18	6.13	1.2767	156.424	1.36	-0.49	0.17	0.297689	20.5731	0.20827	-0.0734633	0.0285235
3	270	6.91	6.98	6.47	0.989971	163.311	7.44	6.17	5.9	1.20583	141.739	0.53	-0.81	-0.57	0.215863	-21.5725	0.0767004	-0.116046	-0.0880989
5	270	7.11	7.06	6.28	1.00708	164.973	6.19	5.84	5.07	1.05993	95.9157	-0.92	-1.22	-1.21	0.0528494	-69.0571	-0.129395	-0.172805	-0.192675
5	270	6.71	6.93	6.67	0.968254	162.315	6.51	7.22	7.36	0.901662	181.04	-0.2	0.29	0.69	-0.0665919	18.7244	-0.0298063	0.041847	0.103448
5	270	6.57	6.63	6.01	0.99095	137.004	7.33	5.78	5.54	1.26817	122.834	0.76	-0.85	-0.47	0.277216	-14.1691	0.115677	-0.128205	-0.078203
5	270	6.67	6.55	5.83	1.01832	133.295	7.21	6.46	5.8	1.1161	141.376	0.54	-0.09	-0.03	0.0977785	8.08044	0.0809595	-0.0137405	-0.0051458
5	270	6.48	6.7	5.88	0.967164	133.6	6.61	6.03	5.54	1.09619	115.56	0.13	-0.67	-0.34	0.129022	-18.0399	0.0200617	-0.1	-0.0578231
5	270	6.18	6.52	5.91	0.947853	124.624	8.34	5.65	4.66	1.47611	114.916	2.16	-0.87	-1.25	0.528253	-9.70852	0.349515	-0.133436	-0.211506
5	270	6.63	6.54	5.39	1.01376	122.309	6.88	6.14	5.7	1.12052	126.011	0.25	-0.4	0.31	0.10676	3.70246	0.0377074	-0.0611621	0.0575139
5	270	6.48	6.2	5.42	1.04516	113.958	7.52	5.74	5.23	1.3101	118.143	1.04	-0.46	-0.19	0.264943	4.18561	0.160494	-0.0741935	-0.0350554
5	270	6.92	6.74	6.07	1.02671	148.161	6.19	6.65	6.64	0.930827	143.04	-0.73	-0.09	0.57	-0.0958792	-5.1203	-0.105491	-0.0133531	0.0939044
5	270	6.73	6.8	6.28	0.989706	150.405	7.32	5.7	5.72	1.28421	124.899	0.59	-1.1	-0.56	0.294505	-25.5055	0.0876672	-0.161765	-0.089172
5	270	6.24	6.25	5.79	0.9984	118.174	6.6	5.34	4.78	1.23596	88.164	0.36	-0.91	-1.01	0.237555	-30.0099	0.0576923	-0.1456	-0.174439
5	270	6.58	6.56	5.82	1.00305	131.471	6.58	5.57	5.37	1.18133	102.999	0	-0.99	-0.45	0.17828	-28.4722	0	-0.150915	-0.0773196
5	270	6.66	6.85	6.05	0.972263	144.444	7.96	6.74	6.34	1.18101	178.008	1.3	-0.11	0.29	0.208746	33.5648	0.195195	-0.0160584	0.0479339
5	270	6.55	6.5	5.83	1.00769	129.898	6.81	5.87	6.33	1.16014	132.424	0.26	-0.63	0.5	0.152444	2.52644	0.0396947	-0.0969231	0.0857633
5	270	6.3	6.07	5.27	1.03789	105.467	6.85	5.79	5.53	1.18307	114.782	0.55	-0.28	0.26	0.145183	9.3143	0.0873016	-0.0461285	0.0493359
5	270	6.88	5.85	5.21	1.17607	109.739	7.41	5.74	5.96	1.29094	132.665	0.53	-0.11	0.75	0.114872	22.9257	0.0770349	-0.0188034	0.143954
5	270	7.06	6.52	5.35	1.08282	128.88	7.25	5.99	5.79	1.21035	131.59	0.19	-0.53	0.44	0.127528	2.70998	0.0269122	-0.0812883	0.082243
5	270	6.24	6.11	5.49	1.02128	109.541	7.83	5.8	5.8	1.35	137.847	1.59	-0.31	0.31	0.328723	28.3057	0.254808	-0.0507365	0.0564663
5	270	7.25	7.07	6.11	1.02546	163.899	8.13	5.91	6.23	1.37563	156.655	0.88	-1.16	0.12	0.350175	-7.2442	0.121379	-0.164074	0.0196399
5	270	6.32	6.09	5.4	1.03777	108.769	8.14	6.72	6.56	1.21131	187.791	1.82	0.63	1.16	0.173543	79.0221	0.287975	0.103448	0.214815
1	280	7.28	7.12	6.72	1.02247	182.288	8.04	6.1	4.78	1.31803	122.685	0.76	-1.02	-1.94	0.295561	-59.6032	0.104396	-0.143258	-0.28869
1	280	6.67	6.34	5.63	1.05205	124.595	6.96	6.12	5.98	1.13725	133.303	0.29	-0.22	0.35	0.0852044	8.70773	0.0434783	-0.0347003	0.062167
1	280	6.68	6.77	6.14	0.986706	145.315	7.77	6.23	5.53	1.24719	140.092	1.09	-0.54	-0.61	0.260485	-5.22373	0.163174	-0.0797637	-0.0993485
1	280	7.13	6.9	5.88	1.03333	151.389	6.69	6.08	6.09	1.10033	129.636	-0.44	-0.82	0.21	0.0669956	-21.7531	-0.0617111	-0.118841	0.0357143
1	280	6.91	7.1	6.66	0.973239	170.997	7.25	6.6	6.36	1.09848	159.264	0.34	-0.5	-0.3	0.125245	-11.7333	0.0492041	-0.0704225	-0.045045
1	280	7.26	6.92	6.22	1.04913	163.535	7.25	6.03	4.83	1.20232	110.505	-0.01	-0.89	-1.39	0.153189	-53.0306	-0.00137741	-0.128613	-0.223473
1	280	7.27	6.64	5.77	1.09488	145.766	7.16	6.99	6.06	1.02432	158.723	-0.11	0.35	0.29	-0.0705591	12.9573	-0.0151307	0.0527108	0.05026
1	280	6.6	5.96	5.6	1.10738	115.281	6.53	5.63	5.59	1.15986	107.55	-0.07	-0.33	-0.01	0.0524754	-7.73037	-0.0106061	-0.0553691	-0.00178571
1	280	6.95	6.68	6.24	1.04042	151.609	7.29	6.14	5.66	1.1873	132.584	0.34	-0.54	-0.58	0.146877	-19.0249	0.0489209	-0.0808383	-0.0929487
1	280	6.67	7.18	6.71	0.928969	168.171	6.69	5.75	5.38	1.16348	108.307	0.02	-1.43	-1.33	0.234509	-59.8645	0.0029985	-0.199164	-0.198212
1	280	6.81	6.68	6	1.01946	142.841	7.43	6.73	6.03	1.10401	157.797	0.62	0.05	0.03	0.0845508	14.9562	0.0910426	0.00748503	0.005
1	280	6.34	6.39	5.7	0.992175	120.849	7.5	7.22	6.71	1.03878	190.151	1.16	0.83	1.01	0.0466059	69.3022	0.182965	0.12989	0.177193
1	280	6.59	6.82	6.06	0.966276	142.535	6.94	6.9	6.32	1.0058	158.381	0.35	0.08	0.26	0.0395214	15.8466	0.0531108	0.0117302	0.0429043
1	280	6.68	6.73	5.98	0.992571	140.693	7.14	6.52	5.9	1.09509	143.74	0.46	-0.21	-0.08	0.102521	3.04698	0.0688623	-0.0312036	-0.0133779
1	280	6.3	6.24	5.36	1.00962	110.273	7	6	5.11	1.16667	112.318	0.7	-0.24	-0.25	0.157051	2.04502	0.111111	-0.0384615	-0.0466418
1	280	7.08	7.32	6.5	0.967213	176.293	6.96	6.54	5.68	1.06422	135.305	-0.12	-0.78	-0.82	0.0970071	-40.9885	-0.0169492	-0.106557	-0.126154
1	280	7.16	6.88	6.25	1.0407	161.124	7.36	6.32	5.25	1.16456	127.801	0.2	-0.56	-1	0.123859	-33.3234	0.027933	-0.0813953	-0.16
1	280	6.82	6.28	5.34	1.08599	119.692	6.7	6.28	5.97	1.06688	131.458	-0.12	0	0.63	-0.0191083	11.7664	-0.0175953	0	0.117978
1	280	6.71	6.08	5.15	1.10362	109.954	7.42	5.6	5.22	1.325	113.512	0.71	-0.48	0.07	0.221382	3.55758	0.105812	-0.0789474	0.0135922
1	280	6.83	6.72	5.95	1.01637	142.917	7.39	6.28	5.81	1.17675	141.11	0.56	-0.44	-0.14	0.160383	-1.80721	0.0819912	-0.0654762	-0.0235294
3	280	6.9	6.68	6.13	1.03293	147.865	7.77	6.31	5.95	1.23138	152.667	0.87	-0.37	-0.18	0.198445	4.80253	0.126087	-0.0553892	-0.0293638
3	280	7.19	6.9	6.05	1.04203	157.077	7.2	6.48	6.34	1.11111	154.801	0.01	-0.42	0.29	0.0690821	-2.2752	0.00139082	-0.0608696	0.0479339
3	280	8.41	7.01	6.06	1.19971	186.967	7.22	5.69	5.65	1.26889	121.472	-1.19	-1.32	-0.41	0.0691781	-65.495	-0.141498	-0.188302	-0.0676568
3	280	7.02	6.76	6.56	1.03846	162.917	8.5	6.53	6.11	1.30168	177.481	1.48	-0.23	-0.45	0.263223	14.5641	0.210826	-0.0340237	-0.0685976
3	280	7.16	6.74	5.76	1.06231	145.47	8.61	6.09	5.51	1.41379	151.2	1.45	-0.65	-0.25	0.351479	5.72941	0.202514	-0.0964392	-0.0434028
3	280	7.17	6.71	6.11	1.06855	153.837	7.22	6.66	6.01	1.08408	151.239	0.05	-0.05	-0.1	0.0155297	-2.598	0.0069735	-0.00745156	-0.0163666
3	280	6.96	7.08	6.71	0.983051	173.039	7.37	5.84	5.36	1.26199	120.732	0.41	-1.24	-1.35	0.278935	-52.3065	0.058908	-0.175141	-0.201192
3	280	7.47	7.04	6.14	1.06108	168.982	7.91	6.73	6.46	1.17533	179.971	0.44	-0.31	0.32	0.114255	10.9891	0.0589023	-0.0440341	0.0521173
3	280	7.64	7.08	6.33	1.0791	179.188	7.67	6.35	5.75	1.20787	146.56	0.03	-0.73	-0.58	0.128778	-32.628	0.0039267	-0.103107	-0.0916272
3	280	6.6	6.03	5.56	1.09453	115.802	7.67	6.28	5.79	1.22134	145.953	1.07	0.25	0.23	0.12681	30.1511	0.162121	0.0414594	0.0413669
3	280	7.17	6.9	6.45	1.03913	166.996	7.77	6.21	6.08	1.25121	153.53	0.6	-0.69	-0.37	0.212077	-13.4656	0.083682	-0.1	-0.0573643
3	280	6.8	7.23	6.97	0.940526	179.332	7.96	5.85	5.43	1.36068	132.327	1.16	-1.38	-1.54	0.420158	-47.0056	0.170588	-0.190871	-0.220947
3	280	7.17	6.87	5.87	1.04367	151.319	10.1	6.45	5.84	1.56589	199.1	2.93	-0.42	-0.03	0.522223	47.7819	0.408647	-0.0611354	-0.00511073
3	280	6.86	6.8	6.18	1.00882	150.869	9.19	6.74	6.64	1.3635	215.239	2.33	-0.06	0.46	0.354678	64.3705	0.33965	-0.00882353	0.0744337
3	280	6.84	6.62	6.11	1.03323	144.788	8.35	6.47	6.13	1.29057	173.312	1.51	-0.15	0.02	0.257339	28.524	0.22076	-0.0226586	0.00327332
3	280	6.57	6.31	5.56	1.0412	120.628	6.59	5.56	5.04	1.18525	96.6427	0.02	-0.75	-0.52	0.144047	-23.9852	0.00304414	-0.118859	-0.0935252
3	280	7.31	6.84	6.06	1.06871	158.571	7.7	6.41	8.19	1.20125	211.549	0.39	-0.43	2.13	0.132535	52.9778	0.0533516	-0.0628655	0.351485
3	280	6.17	6.27	5.67	0.984051	114.793	8.69	6.57	5.4	1.32268	161.346	2.52	0.3	-0.27	0.338628	46.553	0.408428	0.0478469	-0.047619
3	280	7.25	7.18	6.44	1.00975	175.439	8.23	6.74	6.45	1.22107	187.24	0.98	-0.44	0.01	0.211319	11.8004	0.135172	-0.0612813	0.0015528
3	280	6.49	6.14	5.3	1.057	110.527	8.55	6.59	N/A	1.29742
5	280	6.74	6.44	5.91	1.04658	134.249	8.1	6.03	6.2	1.34328	158.479	1.36	-0.41	0.29	0.2967	24.2301	0.20178	-0.0636646	0.0490694
5	280	6.19	6.17	5.47	1.00324	109.331	7.32	6.19	5.84	1.18255	138.482	1.13	0.02	0.37	0.179311	29.1513	0.182553	0.00324149	0.0676417
5	280	7.44	7.19	6.59	1.03477	184.487	7.9	6.96	6.76	1.13506	194.519	0.46	-0.23	0.17	0.100287	10.0318	0.061828	-0.0319889	0.0257967
5	280	6.71	6.4	5.36	1.04844	120.461	8.29	6.61	6.32	1.25416	181.239	1.58	0.21	0.96	0.205723	60.7781	0.235469	0.0328125	0.179104
5	280	7.09	7.11	6.6	0.997187	174.116	7.95	6.75	6.09	1.17778	171.028	0.86	-0.36	-0.51	0.180591	-3.08804	0.121298	-0.0506329	-0.0772727
5	280	6.83	6.62	6	1.03172	141.974	7.27	5.83	5.21	1.247	115.563	0.44	-0.79	-0.79	0.215276	-26.4108	0.0644217	-0.119335	-0.131667
5	280	6.47	6.61	5.83	0.97882	130.483	8.04	5.99	6.23	1.34224	157.018	1.57	-0.62	0.4	0.363417	26.5353	0.242658	-0.0937973	0.0686106
5	280	7.44	7.38	6.58	1.00813	189.075	7.53	5.64	5.67	1.33511	126.019	0.09	-1.74	-0.91	0.326976	-63.0559	0.0120968	-0.235772	-0.138298
5	280	6.25	6.4	5.8	0.976562	121.413	7.69	6.53	5.53	1.17764	145.326	1.44	0.13	-0.27	0.201079	23.9126	0.2304	0.0203125	-0.0465517
5	280	6.73	6.8	6.41	0.989706	153.518	7.23	5.59	5.64	1.29338	119.291	0.5	-1.21	-0.77	0.303675	-34.2274	0.0742942	-0.177941	-0.120125
5	280	6.16	6.3	5.85	0.977778	118.811	6.26	5.64	5.49	1.10993	101.439	0.1	-0.66	-0.36	0.132151	-17.3719	0.0162338	-0.104762	-0.0615385
5	280	7.31	6.76	6.37	1.08136	164.733	N/A	N/A	N/A
5	280	6.8	6.42	5.82	1.05919	132.967	N/A	N/A	N/A
5	280	6.62	6.86	5.98	0.965015	142.122	N/A	N/A	N/A
5	280	7.06	6.89	6.17	1.02467	157.068	N/A	N/A	N/A
5	280	6.19	6.36	5.58	0.97327	114.964	N/A	N/A	N/A
5	280	6.75	6.48	5.71	1.04167	130.705	N/A	N/A	N/A
5	280	6.21	6.32	5.35	0.982595	109.886	N/A	N/A	N/A
5	280	6.33	6.3	5.47	1.00476	114.159	N/A	N/A	N/A
5	280	6.69	6.61	6.02	1.0121	139.316	N/A	N/A	N/A
1	290	7.29	7.06	6.02	1.03258	162.146	8.12	6.05	5.08	1.34215	130.603	0.83	-1.01	-0.94	0.309571	-31.5432	0.113855	-0.143059	-0.156146
1	290	7.2	7.44	7.17	0.967742	201.003	7.53	7.02	5.55	1.07265	153.534	0.33	-0.42	-1.62	0.104908	-47.4696	0.0458333	-0.0564516	-0.225941
1	290	7.03	6.73	5.85	1.04458	144.845	8.07	6.66	4.91	1.21171	138.104	1.04	-0.07	-0.94	0.167135	-6.74094	0.147937	-0.0104012	-0.160684
1	290	7.08	6.93	6.43	1.02165	165.103	6.34	6.78	6.12	0.935103	137.673	-0.74	-0.15	-0.31	-0.0865418	-27.4303	-0.10452	-0.021645	-0.0482115
1	290	6.82	6.52	5.66	1.04601	131.712	7.87	6.09	4.98	1.29228	124.911	1.05	-0.43	-0.68	0.24627	-6.80171	0.153959	-0.0659509	-0.120141
1	290	7.81	7.65	6.75	1.02092	211.055	7.42	6.65	5.66	1.11579	146.157	-0.39	-1	-1.09	0.0948744	-64.8973	-0.049936	-0.130719	-0.161481
1	290	6.8	6.55	6.05	1.03817	141.021	8.5	7.18	5.82	1.18384	185.885	1.7	0.63	-0.23	0.145676	44.8641	0.25	0.0961832	-0.0380165
1	290	6.52	6.72	6.34	0.970238	145.373	8.09	6.95	6.5	1.16403	191.26	1.57	0.23	0.16	0.193791	45.8872	0.240798	0.0342262	0.0252366
1	290	7.45	7.38	6.43	1.00949	185.013	6.74	6.25	5.96	1.0784	131.391	-0.71	-1.13	-0.47	0.0689149	-53.6222	-0.095302	-0.153117	-0.0730949
1	290	7.23	6.93	6.28	1.04329	164.668	8.59	6.66	6.89	1.28979	206.284	1.36	-0.27	0.61	0.2465	41.6156	0.188105	-0.038961	0.0971338
1	290	7.52	7.1	6.25	1.05915	174.636	8.32	6.13	5.51	1.35726	147.067	0.8	-0.97	-0.74	0.298104	-27.5698	0.106383	-0.13662	-0.1184
1	290	6.65	6.24	5.55	1.06571	120.525	7.3	6.11	5.75	1.19476	134.218	0.65	-0.13	0.2	0.129058	13.6927	0.0977444	-0.0208333	0.036036
1	290	6.75	6.53	5.7	1.03369	131.483	7.55	6.91	6.24	1.09262	170.368	0.8	0.38	0.54	0.0589287	38.8848	0.118519	0.058193	0.0947368
1	290	6.82	6.66	5.84	1.02402	138.819	6.51	6.8	5.64	0.957353	130.661	-0.31	0.14	-0.2	-0.0666711	-8.15787	-0.0454545	0.021021	-0.0342466
1	290	5.98	6	5.22	0.996667	98.017	8.16	5.93	5.63	1.37605	142.571	2.18	-0.07	0.41	0.379387	44.5542	0.364548	-0.0116667	0.0785441
1	290	6.7	6.72	5.8	0.997024	136.663	6.8	6.29	5.92	1.08108	132.513	0.1	-0.43	0.12	0.0840573	-4.14949	0.0149254	-0.0639881	0.0206897
1	290	5.89	6.4	5.46	0.920312	107.713	7.47	6.37	6.15	1.17268	153.149	1.58	-0.03	0.69	0.252372	45.4362	0.268251	-0.0046875	0.126374
1	290	6.56	6.73	6.49	0.97474	149.948	7.63	6.06	5.46	1.25908	132.12	1.07	-0.67	-1.03	0.284336	-17.8286	0.16311	-0.0995542	-0.158706
1	290	6.62	6.52	5.84	1.01534	131.916	7.06	6.32	5.83	1.11709	136.135	0.44	-0.2	-0.01	0.101751	4.21886	0.0664653	-0.0306748	-0.00171233
1	290	7.06	6.84	6.27	1.03216	158.455	6.31	5.98	4.73	1.05518	93.405	-0.75	-0.86	-1.54	0.0230202	-65.0503	-0.106232	-0.125731	-0.245614
3	290	7.09	6.54	5.54	1.0841	134.435	7.98	6.29	5.75	1.26868	151.043	0.89	-0.25	0.21	0.184583	16.6078	0.125529	-0.0382263	0.0379061
3	290	6.94	6.99	6.03	0.992847	153.085	7.13	6.62	6.98	1.07704	172.417	0.19	-0.37	0.95	0.0841924	19.3326	0.0273775	-0.0529328	0.157546
3	290	7.31	7.24	6.6	1.00967	182.801	8.03	6.48	6.38	1.2392	173.736	0.72	-0.76	-0.22	0.229529	-9.06495	0.0984952	-0.104972	-0.0333333
3	290	7.19	6.46	5.72	1.113	139.039	9.59	6.31	5.9	1.51981	186.844	2.4	-0.15	0.18	0.406807	47.8049	0.333797	-0.0232198	0.0314685
3	290	7.27	7.18	6.05	1.01253	165.269	8.23	5.94	5.64	1.38552	144.293	0.96	-1.24	-0.41	0.372987	-20.977	0.13205	-0.172702	-0.0677686
3	290	7.43	7.27	6.48	1.02201	183.179	8.15	7.04	6.45	1.15767	193.673	0.72	-0.23	-0.03	0.135662	10.4933	0.0969044	-0.0316369	-0.00462963
3	290	7.28	7.15	6.38	1.01818	173.795	8.04	6.07	6.01	1.32455	153.496	0.76	-1.08	-0.37	0.306365	-20.2985	0.104396	-0.151049	-0.0579937
3	290	7.67	7.23	6.48	1.06086	188.056	9.83	7.32	6.86	1.3429	258.325	2.16	0.09	0.38	0.282039	70.2695	0.281617	0.0124481	0.058642
3	290	7.78	7.21	6.53	1.07906	191.693	8.44	6.8	6.36	1.24118	191.024	0.66	-0.41	-0.17	0.16212	-0.66955	0.0848329	-0.0568655	-0.0260337
3	290	7.35	7.24	6.53	1.01519	181.852	9.97	6.38	5.92	1.5627	197.068	2.62	-0.86	-0.61	0.547503	15.2162	0.356463	-0.118785	-0.093415
3	290	6.49	6.41	6.01	1.01248	130.845	8.99	5.75	5.22	1.56348	141.214	2.5	-0.66	-0.79	0.550998	10.369	0.385208	-0.102964	-0.131448
3	290	6.92	6.3	5.55	1.09841	126.625	8.42	7.05	5.78	1.19433	179.559	1.5	0.75	0.23	0.0959135	52.9345	0.216763	0.119048	0.0414414
3	290	7.68	6.88	6.09	1.11628	168.401	9.03	7.1	6.61	1.27183	221.782	1.35	0.22	0.52	0.155552	53.3806	0.175781	0.0319767	0.0853859
3	290	6.74	6.91	6.24	0.975398	152.09	8.01	7.12	6.61	1.125	197.284	1.27	0.21	0.37	0.149602	45.1941	0.188427	0.0303907	0.0592949
3	290	7.84	7.5	6.53	1.04533	200.941	7.63	5.68	5.49	1.34331	124.516	-0.21	-1.82	-1.04	0.297977	-76.4256	-0.0267857	-0.242667	-0.159265
3	290	7.57	6.95	6	1.08921	165.2	9.17	7.1	6.23	1.29155	212.273	1.6	0.15	0.23	0.202341	47.0726	0.211361	0.0215827	0.0383333
3	290	7.43	6.7	6.35	1.10896	165.431	8.13	6.04	5.87	1.34603	150.85	0.7	-0.66	-0.48	0.237071	-14.581	0.0942127	-0.0985075	-0.0755906
3	290	7.42	7.84	7.46	0.946429	227.11	7.23	5.49	5.46	1.31694	113.418	-0.19	-2.35	-2	0.370511	-113.693	-0.0256065	-0.299745	-0.268097
3	290	6.64	6.57	6.02	1.01065	137.438	9.38	N/A	9.2	N/A	N/A	2.74		3.18			0.412651		0.528239
3	290	7.12	7.01	6.09	1.01569	159.072	7.89	N/A	N/A	N/A	N/A	0.77					0.108146
5	290	7.49	6.68	6.25	1.12126	163.65	6.59	5.58	5.61	1.181	107.96	-0.9	-1.1	-0.64	0.0597461	-55.6908	-0.12016	-0.164671	-0.1024
5	290	6.2	6.09	5.05	1.01806	99.7881	7.02	5.17	5.05	1.35783	95.9174	0.82	-0.92	0	0.339771	-3.87069	0.132258	-0.151067	0
5	290	6.8	6.57	5.81	1.03501	135.84	7.02	6.34	6.11	1.10726	142.313	0.22	-0.23	0.3	0.0722479	6.4731	0.0323529	-0.0350076	0.0516351
5	290	7.27	7.1	6.38	1.02394	172.342	7.36	5.21	5.56	1.41267	111.575	0.09	-1.89	-0.82	0.388724	-60.7668	0.0123796	-0.266197	-0.128527
5	290	6.16	6.48	5.93	0.950617	123.876	7.95	6.53	5.9	1.21746	160.292	1.79	0.05	-0.03	0.266841	36.4151	0.290584	0.00771605	-0.00505902
5	290	6.77	6.53	6.16	1.03675	142.515	7.57	5.75	4.97	1.31652	113.214	0.8	-0.78	-1.19	0.279768	-29.3015	0.118168	-0.119449	-0.193182
5	290	6.09	6.46	5.88	0.942724	121.061	6.75	5.5	5.39	1.22727	104.721	0.66	-0.96	-0.49	0.284548	-16.3404	0.108374	-0.148607	-0.0833333
5	290	7	6.96	5.96	1.00575	151.961	6.87	6.01	5.48	1.14309	118.41	-0.13	-0.95	-0.48	0.137348	-33.5504	-0.0185714	-0.136494	-0.0805369
5	290	6.94	6.11	5.45	1.13584	120.942	8.8	7.44	6.38	1.1828	218.602	1.86	1.33	0.93	0.0469528	97.6607	0.268012	0.217676	0.170642
5	290	6.22	6	5.29	1.03667	103.318	9.64	5.93	6.14	1.62563	183.687	3.42	-0.07	0.85	0.588966	80.3691	0.549839	-0.0116667	0.160681
5	290	6.8	6.64	5.76	1.0241	136.106	9.54	5.71	5.8	1.67075	165.345	2.74	-0.93	0.04	0.646657	29.2387	0.402941	-0.14006	0.00694444
5	290	6.52	5.85	5.13	1.11453	102.4	8.06	6	5.73	1.34333	145.017	1.54	0.15	0.6	0.228803	42.6173	0.236196	0.025641	0.116959
5	290	6.64	6.37	5.58	1.04239	123.515	8.06	6.1	5.37	1.32131	138.171	1.42	-0.27	-0.21	0.278925	14.6561	0.213855	-0.0423862	-0.0376344
5	290	6.53	6.5	5.94	1.00462	131.945	7.27	5.69	5.44	1.27768	117.767	0.74	-0.81	-0.5	0.273065	-14.1774	0.113323	-0.124615	-0.0841751
5	290	6.71	6.81	6.22	0.985316	148.744	7.85	6.19	6.81	1.26817	173.175	1.14	-0.62	0.59	0.282859	24.4316	0.169896	-0.0910426	0.0948553
5	290	6.45	6.17	5.55	1.04538	115.589	6.87	6.02	5.87	1.1412	127.049	0.42	-0.15	0.32	0.0958151	11.4596	0.0651163	-0.0243112	0.0576577
5	290	6.57	6.28	5.63	1.04618	121.566	6.86	6.56	6.35	1.04573	149.548	0.29	0.28	0.72	-0.000446637	27.9819	0.04414	0.044586	0.127886
5	290	6.55	6.39	5.58	1.02504	122.224	7.67	6.34	6.08	1.20978	154.727	1.12	-0.05	0.5	0.18474	32.5037	0.170992	-0.00782473	0.0896057
5	290	6.82	6.52	6.02	1.04601	140.09	6.79	5.58	5.75	1.21685	114.012	-0.03	-0.94	-0.27	0.170834	-26.078	-0.00439883	-0.144172	-0.0448505
5	290	6.08	6.16	5.29	0.987013	103.686	7.32	5.61	5.88	1.30481	126.366	1.24	-0.55	0.59	0.3178	22.6803	0.203947	-0.0892857	0.111531
1	300	6.99	6.88	5.93	1.01599	149.245	8.16	6.1	4.91	1.3377	127.903	1.17	-0.78	-1.02	0.321717	-21.3419	0.167382	-0.113372	-0.172007
1	300	6.9	6.57	5.6	1.05023	132.856	8.49	6.01	5.68	1.41265	151.673	1.59	-0.56	0.08	0.362417	18.8173	0.230435	-0.0852359	0.0142857
1	300	7.2	7.14	6.7	1.0084	180.254	9.19	6.57	5.76	1.39878	182.004	1.99	-0.57	-0.94	0.390379	1.75076	0.276389	-0.0798319	-0.140299
1	300	6.83	6.9	5.77	0.989855	142.306	7.86	6.36	6.38	1.23585	166.909	1.03	-0.54	0.61	0.245994	24.6023	0.150805	-0.0782609	0.105719
1	300	6.67	6.28	5.58	1.0621	122.32	8.47	6.47	5.8	1.30912	166.339	1.8	0.19	0.22	0.247017	44.0188	0.269865	0.0302548	0.0394265
1	300	6.59	6.49	5.03	1.01541	112.584	8.65	6.67	6.66	1.29685	201.092	2.06	0.18	1.63	0.281443	88.5079	0.312595	0.027735	0.324056
1	300	6.65	6.38	5.46	1.04232	121.231	8.41	6.7	5.61	1.25522	165.429	1.76	0.32	0.15	0.212904	44.1982	0.264662	0.0501567	0.0274725
1	300	7.03	6.97	6.16	1.00861	157.96	8.35	6.3	6.25	1.3254	172.062	1.32	-0.67	0.09	0.316789	14.1022	0.187767	-0.0961263	0.0146104
1	300	6.48	6.7	5.97	0.967164	135.645	8.35	6.64	6.13	1.25753	177.866	1.87	-0.06	0.16	0.290366	42.2216	0.28858	-0.00895522	0.0268007
1	300	6.32	6.38	5.67	0.990596	119.646	7.77	6.63	6.43	1.17195	173.35	1.45	0.25	0.76	0.18135	53.7037	0.22943	0.039185	0.134039
1	300	6.9	6.98	5.44	0.988539	137.114	8.12	6.06	6.48	1.33993	166.871	1.22	-0.92	1.04	0.351395	29.7575	0.176812	-0.131805	0.191176
1	300	6.95	7	6.55	0.992857	166.764	7.72	6.51	5.24	1.18587	137.819	0.77	-0.49	-1.31	0.193011	-28.9454	0.110791	-0.07	-0.2
1	300	6.58	6.67	6.43	0.986507	147.687	7.83	5.88	5.46	1.33163	131.556	1.25	-0.79	-0.97	0.345126	-16.1308	0.18997	-0.118441	-0.150855
1	300	6.3	6.13	5.09	1.02773	102.872	8.19	6.65	6.19	1.23158	176.431	1.89	0.52	1.1	0.203846	73.5589	0.3	0.0848287	0.21611
1	300	6.46	6.42	6.18	1.00623	134.133	7.76	7.43	6.26	1.04441	188.888	1.3	1.01	0.08	0.038184	54.7549	0.201238	0.157321	0.012945
1	300	7.31	6.97	6.66	1.04878	177.584	8.56	6.52	5.6	1.31288	163.564	1.25	-0.45	-1.06	0.264103	-14.0195	0.170999	-0.0645624	-0.159159
1	300	6.58	6.55	5.65	1.00458	127.437	8.49	6.37	5.81	1.33281	164.438	1.91	-0.18	0.16	0.32823	37.0012	0.290274	-0.0274809	0.0283186
1	300	6.55	6.64	6.34	0.986446	144.304	8.84	7.09	6.62	1.24683	217.138	2.29	0.45	0.28	0.260381	72.834	0.349618	0.0677711	0.044164
1	300	6.73	6.35	5.58	1.05984	124.796	9.54	6.8	5.56	1.40294	188.76	2.81	0.45	-0.02	0.343099	63.964	0.417533	0.0708661	-0.00358423
1	300	6.47	6.42	5.87	1.00779	127.602	8.28	7.08	7.51	1.16949	230.4	1.81	0.66	1.64	0.161703	102.798	0.279753	0.102804	0.279387
3	300	7.15	7	6.33	1.02143	165.801	8.74	7.1	6.28	1.23099	203.943	1.59	0.1	-0.05	0.209557	38.1419	0.222378	0.0142857	-0.00789889
3	300	6.64	6.07	5.46	1.0939	115.167	8	5.93	6.51	1.34907	161.623	1.36	-0.14	1.05	0.255168	46.4564	0.204819	-0.0230643	0.192308
3	300	6.83	6.37	5.51	1.07221	125.456	8.94	6.54	5.43	1.36697	166.147	2.11	0.17	-0.08	0.294759	40.6918	0.308931	0.0266876	-0.0145191
3	300	6.6	6.73	6.34	0.980684	147.376	8.36	6.22	6.43	1.34405	174.979	1.76	-0.51	0.09	0.363368	27.6031	0.266667	-0.0757801	0.0141956
3	300	6.53	5.89	5.59	1.10866	112.517	7.94	6.9	7.33	1.15072	210.161	1.41	1.01	1.74	0.0420659	97.6438	0.215926	0.171477	0.31127
3	300	6.88	6.18	5.93	1.11327	131.95	8.85	6.32	6.33	1.40032	185.286	1.97	0.14	0.4	0.287048	53.3358	0.286337	0.0226537	0.0674536
3	300	6.71	6.48	5.96	1.03549	135.62	8.13	6.91	6.17	1.17656	181.398	1.42	0.43	0.21	0.141062	45.7783	0.211624	0.066358	0.0352349
3	300	6.39	6.31	5.97	1.01268	125.975	8.09	6.2	6.02	1.30484	158.021	1.7	-0.11	0.05	0.29216	32.0465	0.266041	-0.0174326	0.00837521
3	300	6.93	6.82	6.66	1.01613	164.729	7.24	6.66	5.53	1.08709	139.546	0.31	-0.16	-1.13	0.0709581	-25.1834	0.044733	-0.0234604	-0.16967
3	300	7.16	7.04	6.11	1.01705	161.178	7.89	6.59	6.1	1.19727	165.986	0.73	-0.45	-0.01	0.180223	4.80787	0.101955	-0.0639205	-0.00163666
3	300	7.55	6.99	6.09	1.08011	168.198	7.77	6.78	7.01	1.14602	193.262	0.22	-0.21	0.92	0.0659032	25.0647	0.0291391	-0.0300429	0.151067
3	300	6.31	6.32	5.32	0.998418	111.029	7.94	7.2	6.31	1.10278	188.782	1.63	0.88	0.99	0.10436	77.7531	0.25832	0.139241	0.18609
3	300	7.04	6.93	6.11	1.01587	156	8.42	5.99	5.48	1.40568	144.643	1.38	-0.94	-0.63	0.389803	-11.3572	0.196023	-0.135642	-0.10311
3	300	6.58	6.55	5.72	1.00458	129.015	9.28	6.02	5.49	1.54153	160.507	2.7	-0.53	-0.23	0.536948	31.492	0.410334	-0.080916	-0.0402098
3	300	6.52	6.38	6.02	1.02194	131.052	8.06	6.92	6.77	1.16474	197.61	1.54	0.54	0.75	0.142796	66.5578	0.236196	0.0846395	0.124585
3	300	6.73	6.75	5.99	0.997037	142.405	N/A	N/A	N/A
3	300	6.93	6.28	5.68	1.1035	129.366	N/A	N/A	N/A
3	300	6.75	6.57	5.54	1.0274	128.575	N/A	N/A	N/A
3	300	6.52	6.27	5.61	1.03987	120.021	N/A	N/A	N/A
3	300	7.46	6.78	6.19	1.10029	163.847	N/A	N/A	N/A
5	300	7.01	6.53	5.99	1.07351	143.495	8.58	6.39	6.17	1.34272	177.032	1.57	-0.14	0.18	0.269216	33.5371	0.223966	-0.0214395	0.0300501
5	300	6.67	6.32	5.5	1.05538	121.334	7.91	6.65	6.76	1.18947	186.09	1.24	0.33	1.26	0.134094	64.7557	0.185907	0.0522152	0.229091
5	300	7.27	7.23	6.71	1.00553	184.575	8.52	6	6.03	1.42	161.319	1.25	-1.23	-0.68	0.414467	-23.2559	0.171939	-0.170124	-0.101341
5	300	6.82	5.46	4.97	1.24908	96.8527	7.89	6.48	5.95	1.21759	159.202	1.07	1.02	0.98	-0.0314917	62.3489	0.156891	0.186813	0.197183
5	300	2.44	6.59	1.03	0.370258	8.66744	7.5	5.68	5.83	1.32042	129.974	5.06	-0.91	4.8	0.950165	121.307	2.07377	-0.138088	4.66019
5	300	7.33	7.19	6.14	1.01947	169.348	9.03	6.59	6.9	1.37026	214.882	1.7	-0.6	0.76	0.350786	45.5345	0.231924	-0.0834492	0.123779
5	300	7.52	7.08	6.04	1.06215	168.293	7.39	6.54	6.31	1.12997	159.599	-0.13	-0.54	0.27	0.0678225	-8.69423	-0.0172872	-0.0762712	0.044702
5	300	6.45	6.61	5.83	0.975794	130.079	8.66	6.38	5.44	1.35737	157.295	2.21	-0.23	-0.39	0.381573	27.2161	0.342636	-0.0347958	-0.0668954
5	300	6.83	6.46	6.06	1.05728	139.928	7.2	6.25	6	1.152	141.3	0.37	-0.21	-0.06	0.0947245	1.37212	0.0541728	-0.0325077	-0.00990099
5	300	7.22	7.13	6.7	1.01262	180.501	8.62	6.75	7.14	1.27704	217.414	1.4	-0.38	0.44	0.264414	36.9129	0.193906	-0.0532959	0.0656716
5	300	6.67	6.68	5.88	0.998503	137.106	8.86	6.31	6.75	1.40412	197.49	2.19	-0.37	0.87	0.405617	60.3836	0.328336	-0.0553892	0.147959
5	300	7.32	6.98	5.41	1.04871	144.658	7.79	6.2	7.03	1.25645	177.69	0.47	-0.78	1.62	0.207741	33.032	0.0642077	-0.111748	0.299445
5	300	6.6	6.28	5.53	1.05096	119.952	8.61	6.18	6.18	1.3932	172.091	2.01	-0.1	0.65	0.342248	52.1392	0.304545	-0.0159236	0.117541
5	300	7.14	6.87	6.24	1.0393	160.184	8.88	6.1	6.95	1.45574	197.018	1.74	-0.77	0.71	0.416436	36.8345	0.243697	-0.112082	0.113782
5	300	6.57	6.73	6.2	0.976226	143.467	8.58	5.97	6.21	1.43719	166.468	2.01	-0.76	0.01	0.46096	23.0018	0.305936	-0.112927	0.0016129
5	300	6.46	6.5	5.66	0.993846	124.377	8.73	6.88	7.71	1.2689	242.346	2.27	0.38	2.05	0.275049	117.969	0.351393	0.0584615	0.362191
5	300	7.54	6.89	6.3	1.09434	171.281	8.06	6.66	6.67	1.21021	187.376	0.52	-0.23	0.37	0.115871	16.0947	0.0689655	-0.0333817	0.0587302
5	300	7.32	7.09	6.25	1.03244	169.752	8.26	7.02	6.42	1.17664	194.819	0.94	-0.07	0.17	0.144198	25.0663	0.128415	-0.00987306	0.0272
5	300	7.1	6.63	5.91	1.07089	145.592	8.27	6.68	6.78	1.23802	196.015	1.17	0.05	0.87	0.167134	50.4233	0.164789	0.00754148	0.147208
5	300	6.34	6.49	5.82	0.976888	125.324	N/A	N/A	N/A
