# Supplementary material for: Charring-induced morphological changes of Chinese “Five Grains”: An experimental study
Source: Front Plant Sci. 2023 Feb 3;14:1063617. doi: 10.3389/fpls.2023.1063617 (PMC9935936; doi:10.3389/fpls.2023.1063617)
Supplement: Supplementary Table 3 — Detailed statistical results and charring condition of each group. [file Table_3.xlsx]

## Sheet: Broomcorn Millet
Time (h)	Temperature (℃)	Statistical results before charring							Charring condition					Statistical results after charring
		Length (mm)	Width (mm)	Thickness (mm)	L/W ratio	Volume (mm³)	Weight (g)	Density (g/mm³)	heating/charring class	preservation condition	color	shininess	Photo after charring	Length (mm)	Width (mm)	Thickness (mm)	L/W ratio	Volume (mm³)	Weight (g)	Density (g/mm³)	Length variation (mm)	Width variation (mm)	Thickness variation (mm)	L/W ratio variation	Volume variation (mm³)	Weight variation (g)	Density variation (g/mm³)	Shrinkage of length (%)	Shrinkage of Width (%)	Shrinkage of Thickness (%)	Shrinkage of weight (%)
1	240	2.062	2.2545	1.71	0.91686	7.93834	0.118	0.000743229	heating1	no noticable distortion	yellow	no		2.0085	2.203	1.644	0.912694	7.2774	0.106	0.000728282	-0.0535	-0.0515	-0.066	-0.00416581	-0.660935	-0.012	-1.49469e-05	-0.0259457	-0.0228432	-0.0385965	-0.101695
3	240	2.191	2.3125	1.728	0.947664	8.75797	0.125	0.000713636	heating2	slightly distorted	light brown	no		2.156	2.36	1.8615	0.917778	9.4792	0.106	0.000559119	-0.035	0.0475	0.1335	-0.0298864	0.72123	-0.019	-0.000154517	-0.0159744	0.0205405	0.0772569	-0.152
5	240	2.0945	2.267	1.6935	0.924787	8.0448	0.119	0.000739608	charring1	slightly distorted	dark brown	no		2.084	2.4165	1.855	0.862519	9.38126	0.102	0.000543637	-0.0105	0.1495	0.1615	-0.0622681	1.33645	-0.017	-0.000195971	-0.00501313	0.0659462	0.0953646	-0.142857
1	250	2.0605	2.2185	1.666	0.930369	7.62622	0.115	0.000753978	heating2	no noticable distortion	yellow	no		2.0265	2.165	1.6555	0.937492	7.2881	0.104	0.000713491	-0.034	-0.0535	-0.0105	0.00712308	-0.338117	-0.011	-4.04861e-05	-0.0165008	-0.0241154	-0.00630252	-0.0956522
3	250	2.104	2.2705	1.713	0.929449	8.18241	0.122	0.000745502	charring1	medium distorted	dark brown	no		2.13944	2.62722	1.93944	0.818304	10.9051	0.097	0.000494162	0.0354444	0.356722	0.226444	-0.111144	2.72271	-0.025	-0.00025134	0.0168462	0.157112	0.132192	-0.204918
5	250	2.0995	2.2825	1.7215	0.919931	8.26762	0.123	0.000743866	charring2	medium distorted	dark brown	no		2.0255	2.55	1.8555	0.797857	9.63173	0.082	0.000425676	-0.074	0.2675	0.134	-0.122074	1.36412	-0.041	-0.00031819	-0.0352465	0.117196	0.0778391	-0.333333
1	260	2.212	2.352	1.762	0.941982	9.18629	0.116	0.000631375	charring1	no noticable distortion	light brown	no		2.072	2.2175	1.6755	0.931997	7.86272	0.103	0.000654989	-0.14	-0.1345	-0.0865	-0.00998536	-1.32357	-0.013	2.36138e-05	-0.0632911	-0.0571854	-0.0490919	-0.112069
3	260	2.124	2.2755	1.7195	0.936862	8.30054	0.121	0.000728868	charring1	medium distorted	black	yes		2.264	2.723	2.038	0.839567	12.6653	0.085	0.000335564	0.14	0.4475	0.3185	-0.0972953	4.36472	-0.036	-0.000393305	0.0659134	0.19666	0.185228	-0.297521
5	260	2.121	2.301	1.755	0.922737	8.57761	0.122	0.000711153	charring2	identified by gorss morphology with some part clearly distorted	black	yes		2.1105	2.674	2.015	0.792663	11.3834	0.064	0.000281111	-0.0105	0.373	0.26	-0.130074	2.80581	-0.058	-0.000430043	-0.0049505	0.162103	0.148148	-0.47541
1	270	2.108	2.3	1.722	0.917504	8.34906	0.122	0.000730622	charring1	identified by gorss morphology with some part clearly distorted	black	yes		2.479	3.248	2.3035	0.770412	18.6292	0.095	0.000254976	0.371	0.948	0.5815	-0.147091	10.2802	-0.027	-0.000475646	0.175996	0.412174	0.337689	-0.221311
3	270	2.067	2.2525	1.7095	0.918957	7.96856	0.119	0.000746685	charring2	identified by gorss morphology with some part clearly distorted	black	yes		2.245	2.872	2.004	0.807541	12.9421	0.067	0.000258845	0.178	0.6195	0.2945	-0.111416	4.97353	-0.052	-0.000487839	0.0861151	0.275028	0.172273	-0.436975
5	270	2.089	2.2885	1.718	0.913899	8.23374	0.121	0.000734782	charring2	identified by gorss morphology with some part clearly distorted	black	yes		2.0215	2.801	1.9975	0.73252	11.3402	0.062	0.000273364	-0.0675	0.5125	0.2795	-0.181379	3.10645	-0.059	-0.000461418	-0.0323121	0.223946	0.162689	-0.487603
1	280	2.06	2.263	1.679	0.912796	7.83798	0.119	0.000759124	charring2	identified by gorss morphology with some part clearly distorted	black	yes		2.358	3.3055	2.24	0.718612	17.464	0.091	0.000260536	0.298	1.0425	0.561	-0.194184	9.62599	-0.028	-0.000498587	0.14466	0.460672	0.334127	-0.235294
3	280	2.089	2.2615	1.693	0.924184	8.02708	0.12	0.00074747	charring2	identified by gorss morphology with some part clearly distorted	black	yes		2.113	2.942	2.002	0.725116	12.5448	0.061	0.000243128	0.024	0.6805	0.309	-0.199068	4.51773	-0.059	-0.000504342	0.0114888	0.300906	0.182516	-0.491667
5	280	2.061	2.2735	1.711	0.907073	8.02726	0.121	0.000753682	charring2	identified by gorss morphology with some part clearly distorted	black	yes		2.0635	2.745	1.886	0.754246	10.7033	0.051	0.000238245	0.0025	0.4715	0.175	-0.152828	2.676	-0.07	-0.000515437	0.001213	0.207389	0.102279	-0.578512
1	290	2.1755	2.2565	1.7	0.964622	8.35894	0.122	0.000729758	charring2	identified by gorss morphology with some part clearly distorted	black	yes		2.5295	3.172	2.235	0.801525	18.1207	0.07	0.00019315	0.354	0.9155	0.535	-0.163098	9.76173	-0.052	-0.000536608	0.162721	0.405717	0.314706	-0.42623
3	290	2.089	2.288	1.7055	0.913448	8.15286	0.127	0.000778867	charring2	identified by gorss morphology with some part clearly distorted	black	yes		2.282	2.87	2.061	0.803798	13.5082	0.058	0.000214685	0.193	0.582	0.3555	-0.10965	5.35529	-0.069	-0.000564182	0.0923887	0.254371	0.208443	-0.543307
5	290	2.078	2.279	1.7345	0.913692	8.21505	0.121	0.000736454	charring2	identified by gorss morphology with some part clearly distorted	black	yes		2.2385	2.863	1.981	0.795034	12.7094	0.045	0.000177034	0.1605	0.584	0.2465	-0.118658	4.49438	-0.076	-0.00055942	0.0772377	0.256253	0.142116	-0.628099
1	300	2.1425	2.2625	1.713	0.947339	8.3063	0.121	0.000728363	charring2	unidentifiable	black	yes		2.418	3.2075	2.1815	0.757772	17.014	0.08	0.000235101	0.2755	0.945	0.4685	-0.189567	8.70769	-0.041	-0.000493262	0.128588	0.41768	0.273497	-0.338843
3	300	2.144	2.32	1.724	0.924693	8.57144	0.121	0.000705832	charring2	unidentifiable	black	yes		2.3675	3.1675	2.341	0.758284	17.5974	0.047	0.000133542	0.2235	0.8475	0.617	-0.166409	9.02598	-0.074	-0.00057229	0.104244	0.365302	0.357889	-0.61157
5	300	2.0875	2.3055	1.733	0.90571	8.3475	0.122	0.000730758	charring2	unidentifiable	black	yes		2.22889	2.85944	2.08278	0.793197	13.3312	0.041	0.000170861	0.141389	0.553944	0.349778	-0.112513	4.98367	-0.081	-0.000559896	0.0677312	0.240271	0.201834	-0.663934
Mean		2.10757	2.28021	1.71481	0.925455	8.25131	0.12081	0.000733029						2.20147	2.76139	1.99308	0.810901	12.4656	0.077	0.000351881	0.0938968	0.481175	0.278272	-0.114554	4.21433	-0.0438095	-0.000381148	0.0445671	0.211196	0.162481	-0.360895

## Sheet: Foxtail Millet
Time (h)	Temperature (℃)	Statistical results before charring							Charring condition					Statistical results after charring
		Length (mm)	Width (mm)	Thickness (mm)	L/W ratio	Volume (mm³)	Weight (g)	Density (g/mm³)	heating/charring class	preservation condition	color	shininess	Photo after charring	Length (mm)	Width (mm)	Thickness (mm)	L/W ratio	Volume (mm³)	Weight (g)	Density (g/mm³)	Length variation (mm)	Width variation (mm)	Thickness variation (mm)	L/W ratio variation	Volume variation (mm³)	Weight variation (g)	Density variation (g/mm³)	Shrinkage of length (%)	Shrinkage of Width (%)	Shrinkage of Thickness (%)	Shrinkage of weight (%)
1	240	1.4425	1.746	1.3435	0.82899	3.40933	0.058	0.000850606	heating1	no noticable distortion	light brown	no		1.3905	1.663	1.2605	0.836083	2.93805	0.054	0.000918977	-0.052	-0.083	-0.083	0.00709333	-0.471286	-0.004	6.83713e-05	-0.0360485	-0.0475372	-0.0617789	-0.0689655
3	240	1.41	1.7465	1.331	0.808242	3.28864	0.059	0.000897028	heating2	slightly distorted	light brown	no		1.3115	1.6285	1.238	0.805485	2.65674	0.05	0.000941001	-0.0985	-0.118	-0.093	-0.00275701	-0.631892	-0.009	4.39729e-05	-0.0698582	-0.0675637	-0.0698723	-0.152542
5	240	1.4635	1.7585	1.314	0.833213	3.38286	0.059	0.000872042	heating2	slightly distorted	dark brown	no		1.502	2.1285	1.4055	0.712088	4.5003	0.048	0.000533298	0.0385	0.37	0.0915	-0.121124	1.11744	-0.011	-0.000338745	0.0263068	0.210407	0.0696347	-0.186441
1	250	1.4055	1.7345	1.268	0.81371	3.10243	0.057	0.000918635	heating2	no noticable distortion	light brown	no		1.449	1.7095	1.2355	0.851278	3.09163	0.053	0.000857154	0.0435	-0.025	-0.0325	0.0375673	-0.0108028	-0.004	-6.1481e-05	0.0309498	-0.0144134	-0.0256309	-0.0701754
3	250	1.3795	1.6905	1.25	0.815844	2.92717	0.058	0.000990719	heating2	medium distorted	dark brown	no		1.4185	2.1585	1.378	0.663792	4.22681	0.044	0.000520487	0.039	0.468	0.128	-0.152052	1.29964	-0.014	-0.000470232	0.0282711	0.276841	0.1024	-0.241379
5	250	1.4765	1.785	1.288	0.828028	3.40705	0.062	0.000909879	charring1	medium distorted	dark brown	no		1.3295	2.0785	1.2915	0.643984	3.59054	0.039	0.000543094	-0.147	0.2935	0.0035	-0.184044	0.183491	-0.023	-0.000366785	-0.0995598	0.164426	0.00271739	-0.370968
1	260	1.4555	1.7755	1.329	0.821178	3.44895	0.06	0.000869829	charring1	slightly distorted	light brown	no		1.38556	2.205	1.46556	0.635464	4.5562	0.049	0.000597476	-0.0699444	0.4295	0.136556	-0.185714	1.10725	-0.011	-0.000272353	-0.0480553	0.241904	0.102751	-0.183333
3	260	1.4485	1.728	1.2885	0.838207	3.23353	0.06	0.000927779	charring1	medium distorted	black	yes		1.48	2.22632	1.38632	0.669818	4.56642	0.035	0.000403402	0.0315	0.498316	0.0978158	-0.168389	1.33289	-0.025	-0.000524376	0.0217466	0.288377	0.0759145	-0.416667
5	260	1.445	1.76	1.353	0.821541	3.4457	0.06	0.00087065	charring2	identified by gorss morphology with some part clearly distorted	black	yes		1.3825	2.1085	1.302	0.658541	3.83299	0.034	0.000443518	-0.0625	0.3485	-0.051	-0.163	0.387287	-0.026	-0.000427132	-0.0432526	0.198011	-0.037694	-0.433333
1	270	1.4435	1.7895	1.3005	0.808984	3.36076	0.06	0.000892655	charring1	identified by gorss morphology with some part clearly distorted	black	yes		1.565	2.5155	1.511	0.625503	6.00995	0.049	0.000407658	0.1215	0.726	0.2105	-0.183482	2.64919	-0.011	-0.000484998	0.0841704	0.4057	0.161861	-0.183333
3	270	1.4465	1.739	1.303	0.832498	3.28877	0.058	0.00088179	charring1	identified by gorss morphology with some part clearly distorted	black	yes		1.8175	2.963	1.8635	0.622619	10.0304	0.029	0.00014456	0.371	1.224	0.5605	-0.209879	6.74166	-0.029	-0.00073723	0.256481	0.703853	0.430161	-0.5
5	270	1.4085	1.7655	1.35	0.797584	3.36372	0.061	0.000906733	charring2	identified by gorss morphology with some part clearly distorted	black	yes		1.3605	2.1345	1.384	0.638479	4.12446	0.033	0.000400052	-0.048	0.369	0.034	-0.159105	0.760737	-0.028	-0.000506681	-0.0340788	0.209006	0.0251852	-0.459016
1	280	1.449	1.785	1.3335	0.812544	3.44868	0.06	0.000869898	charring1	identified by gorss morphology with some part clearly distorted	black	yes		1.6545	2.571	1.6395	0.647214	7.2079	0.041	0.00028441	0.2055	0.786	0.306	-0.16533	3.75921	-0.019	-0.000585487	0.141822	0.440336	0.229471	-0.316667
3	280	1.5075	1.7635	1.315	0.855252	3.50582	0.058	0.000827196	charring2	identified by gorss morphology with some part clearly distorted	black	yes		1.4795	2.3185	1.4915	0.647378	5.13364	0.029	0.000282451	-0.028	0.555	0.1765	-0.207874	1.62782	-0.029	-0.000544746	-0.0185738	0.314715	0.134221	-0.5
5	280	1.4605	1.777	1.3655	0.822498	3.54736	0.06	0.000845698	charring2	identified by gorss morphology with some part clearly distorted	black	yes		1.398	2.1325	1.3725	0.658748	4.09062	0.024	0.000293354	-0.0625	0.3555	0.007	-0.16375	0.543252	-0.036	-0.000552344	-0.0427936	0.200056	0.00512633	-0.6
1	290	1.462	1.7385	1.3355	0.841687	3.39613	0.057	0.000839191	charring2	identified by gorss morphology with some part clearly distorted	black	yes		1.72	2.6585	1.7165	0.653787	7.99246	0.036	0.000225212	0.258	0.92	0.381	-0.1879	4.59633	-0.021	-0.000613979	0.176471	0.529192	0.285286	-0.368421
3	290	1.3895	1.779	1.332	0.782145	3.29304	0.059	0.00089583	charring2	identified by gorss morphology with some part clearly distorted	black	yes		1.464	2.36	1.4265	0.633492	4.93215	0.029	0.00029399	0.0745	0.581	0.0945	-0.148653	1.63911	-0.03	-0.00060184	0.0536164	0.326588	0.0709459	-0.508475
5	290	1.4145	1.7855	1.3525	0.792626	3.42943	0.059	0.000860201	charring2	identified by gorss morphology with some part clearly distorted	black	yes		1.453	2.295	1.4705	0.644093	5.01407	0.024	0.000239326	0.0385	0.5095	0.118	-0.148534	1.58464	-0.035	-0.000620875	0.0272181	0.285354	0.0872458	-0.59322
1	300	1.6285	2.0305	1.5165	0.802736	5.03034	0.058	0.000576501	charring2	unidentifiable	black	yes		1.5835	2.5855	1.592	0.622479	6.63788	0.034	0.000256106	-0.045	0.555	0.0755	-0.180258	1.60753	-0.024	-0.000320395	-0.0276328	0.273332	0.0497857	-0.413793
3	300	1.4945	1.784	1.3185	0.838049	3.52885	0.059	0.000835966	charring2	unidentifiable	black	yes		1.634	2.4955	1.6625	0.655913	6.97579	0.021	0.000150521	0.1395	0.7115	0.344	-0.182136	3.44694	-0.038	-0.000685446	0.0933423	0.398823	0.260903	-0.644068
5	300	1.548	1.8125	1.389	0.854492	3.90495	0.067	0.000857885	charring2	unidentifiable	black	yes		1.59105	2.31	1.57737	0.69115	5.93245	0.023	0.000204052	0.0430526	0.4975	0.188368	-0.163342	2.0275	-0.044	-0.000653833	0.0278118	0.274483	0.135614	-0.656716
Mean		1.45614	1.77495	1.33221	0.821431	3.46398	0.0594762	0.00086651						1.49379	2.2498	1.46049	0.677018	5.14483	0.0370476	0.000425719	0.037648	0.474848	0.128273	-0.144412	1.68085	-0.0224286	-0.000440791	0.0261121	0.267233	0.0968689	-0.374644

## Sheet: Rice
Time (h)	Temperature (℃)	Statistical results before charring							Charring condition					Statistical results after charring
		Length (mm)	Width (mm)	Thickness (mm)	L/W ratio	Volume (mm³)	Weight (g)	Density (g/mm³)	heating/charring class	preservation condition	color	shininess	Photo after charring	Length (mm)	Width (mm)	Thickness (mm)	L/W ratio	Volume (mm³)	Weight (g)	Density (g/mm³)	Length variation (mm)	Width variation (mm)	Thickness variation (mm)	L/W ratio variation	Volume variation (mm³)	Weight variation (g)	Density variation (g/mm³)	Shrinkage of length (%)	Shrinkage of Width (%)	Shrinkage of Thickness (%)	Shrinkage of weight (%)
1	240	4.952	2.8955	2.152	1.71559	30.969	0.462	0.000745908	charring1	no noticable distortion	light brown	no		4.635	2.747	1.9945	1.69268	25.4364	0.392	0.000770549	-0.317	-0.1485	-0.1575	-0.0229111	-5.53256	-0.07	2.4641e-05	-0.0640145	-0.0512865	-0.0731877	-0.151515
3	240	5.0195	2.947	2.2435	1.7074	33.2085	0.459	0.000691088	charring1	slightly distorted (interfacial cracking)	dark brown	no		4.9055	2.8265	2.141	1.74051	29.8737	0.374	0.000625968	-0.114	-0.1205	-0.1025	0.0331142	-3.33479	-0.085	-6.51197e-05	-0.0227114	-0.040889	-0.0456875	-0.185185
5	240	4.819	2.9015	2.114	1.66424	29.6624	0.444	0.000748423	charring2	medium distorted	dark brown	no		5.2785	3.0575	2.454	1.72859	39.7026	0.333	0.000419368	0.4595	0.156	0.34	0.0643568	10.0402	-0.111	-0.000329055	0.0953517	0.0537653	0.160833	-0.25
1	250	5.0155	2.9595	2.138	1.69947	31.7541	0.466	0.000733764	charring1	no noticable distortion	light brown	no		4.759	2.793	2.02	1.70847	26.9052	0.399	0.000741492	-0.2565	-0.1665	-0.118	0.00899484	-4.84883	-0.067	7.72707e-06	-0.0511415	-0.0562595	-0.0551918	-0.143777
3	250	5.0255	2.918	2.1515	1.72965	31.5799	0.469	0.000742561	charring2	medium distorted	dark brown	yes		5.8055	3.1305	2.6345	1.86779	48.0314	0.308	0.000320624	0.78	0.2125	0.483	0.138136	16.4515	-0.161	-0.000421937	0.155208	0.0728239	0.224495	-0.343284
5	250	4.924	2.92	2.109	1.69157	30.354	0.466	0.000767609	charring2	identified by gorss morphology with some part clearly distorted	dark brown	yes		5.5385	2.961	2.4855	1.87385	40.8422	0.271	0.000331765	0.6145	0.041	0.3765	0.182276	10.4882	-0.195	-0.000435844	0.124797	0.0140411	0.178521	-0.418455
1	260	5.0135	2.924	2.199	1.71962	32.2211	0.476	0.000738647	charring1	no noticable distortion	light brown	no		4.764	2.804	2.0615	1.70197	27.5391	0.405	0.000735318	-0.2495	-0.12	-0.1375	-0.0176441	-4.68197	-0.071	-3.32904e-06	-0.0497656	-0.0410397	-0.0625284	-0.14916
3	260	4.9105	3.0305	2.1665	1.6233	32.2869	0.479	0.000741788	charring2	identified by gorss morphology with some part clearly distorted	black	yes		6.0135	3.2195	2.7685	1.873	53.7978	0.275	0.000255586	1.103	0.189	0.602	0.249701	21.511	-0.204	-0.000486201	0.224621	0.0623659	0.277868	-0.425887
5	260	4.834	2.9585	2.1255	1.63515	30.5047	0.46	0.000753983	charring2	identified by gorss morphology with some part clearly distorted	black	yes		5.8405	2.9895	2.59	1.97388	45.2497	0.234	0.000258565	1.0065	0.031	0.4645	0.338725	14.745	-0.226	-0.000495418	0.208213	0.0104783	0.218537	-0.491304
1	270	4.9175	2.929	2.149	1.68158	30.9718	0.461	0.000744225	charring2	identified by gorss morphology with some part clearly distorted	black	yes		6.566	3.482	3.256	1.90046	74.9402	0.355	0.000236855	1.6485	0.553	1.107	0.21888	43.9684	-0.106	-0.000507369	0.335231	0.188802	0.515123	-0.229935
3	270	4.9425	2.9025	2.1775	1.70753	31.2827	0.472	0.000754412	charring2	identified by gorss morphology with some part clearly distorted	black	yes		6.0215	3.1915	2.8865	1.89498	55.4928	0.266	0.000239671	1.079	0.289	0.709	0.187455	24.2102	-0.206	-0.000514741	0.218311	0.0995693	0.325603	-0.436441
5	270	4.878	2.9495	2.1855	1.65571	31.4993	0.467	0.000741286	charring2	identified by gorss morphology with some part clearly distorted	black	yes		6.0035	3.18053	2.85842	1.89083	54.3445	0.201	0.000194665	1.1255	0.231026	0.672921	0.235121	22.8452	-0.266	-0.000546621	0.23073	0.0783273	0.307903	-0.569593
1	280	4.9455	2.9825	2.214	1.66244	32.6431	0.488	0.000747479	charring2	unidentifiable	black	yes		6.86	3.775	3.81	1.81181	102.327	0.255	0.001246	1.9145	0.7925	1.596	0.149372	69.6841	-0.233	0.000498525	0.38712	0.265717	0.720867	-0.477459
3	280	5.0225	3.004	2.185	1.67634	33.0145	0.468	0.00070878	charring2	unidentifiable	black	yes		6.725	3.4875	3.10125	1.92252	72.6866	0.209	0.00035942	1.7025	0.4835	0.91625	0.246175	39.6721	-0.259	-0.00034936	0.338975	0.160952	0.419336	-0.553419
5	280	4.8995	2.8985	2.1565	1.69322	30.6917	0.456	0.000742873	charring2	unidentifiable	black	yes		5.93909	3.00636	2.72727	1.98578	48.7891	0.193	0.000359619	1.03959	0.107864	0.570773	0.292554	18.0974	-0.263	-0.000383254	0.212183	0.0372136	0.264676	-0.576754
1	290	4.9445	2.958	2.26	1.67406	33.176	0.462	0.000696287	charring2	unidentifiable	black	yes							0.238							-0.224	-0.000696287				-0.484848
3	290	5.1905	3.0745	2.3055	1.6912	36.7702	0.478	0.000649983	charring2	unidentifiable	black	yes		6.77263	3.47222	3.30889	1.9435	77.1623	0.179	0.000257754	1.58213	0.397722	1.00339	0.252299	40.3921	-0.299	-0.000392229	0.304813	0.129362	0.435215	-0.625523
5	290	4.8075	2.863	2.1095	1.69008	28.8548	0.437	0.000757241	charring2	unidentifiable	black	yes							0.136							-0.301	-0.000757241				-0.688787
1	300	4.9465	2.9585	2.1885	1.67411	32.0466	0.475	0.000741109	charring2	unidentifiable	black	yes							0.208							-0.267	-0.000741109				-0.562105
3	300	5.001	2.987	2.179	1.67718	32.5633	0.475	0.000729349	charring2	unidentifiable	black	yes		7.095	3.6	3.05	1.91111	75.5424	0.163	0.00215773	2.094	0.613	0.871	0.233936	42.9791	-0.312	0.00142838	0.418716	0.205223	0.399725	-0.656842
5	300	4.7055	2.8105	2.0125	1.6774	26.7083	0.393	0.000735725	charring2	unidentifiable	black	yes							0.138							-0.255	-0.000735725				-0.648855
Mean		4.93879	2.94152	2.16769	1.68318	31.5601	0.462524	0.000733929						5.85428	3.16021	2.71458	1.84834	52.8625	0.263429	0.000559468	0.894837	0.20833	0.54099	0.164149	20.9815	-0.199095	-0.000281027	0.18039	0.0699509	0.247771	-0.431863

## Sheet: Wheat
Time (h)	Temperature (℃)	Statistical results before charring							Charring condition					Statistical results after charring
		Length (mm)	Width (mm)	Thickness (mm)	L/W ratio	Volume (mm³)	Weight (g)	Density (g/mm³)	heating/charring class	preservation condition	color	shininess	Photo after charring	Length (mm)	Width (mm)	Thickness (mm)	L/W ratio	Volume (mm³)	Weight (g)	Density (g/mm³)	Length variation (mm)	Width variation (mm)	Thickness variation (mm)	L/W ratio variation	Volume variation (mm³)	Weight variation (g)	Density variation (g/mm³)	Shrinkage of length (%)	Shrinkage of Width (%)	Shrinkage of Thickness (%)	Shrinkage of weight (%)
1	240	6.614	3.485	3.3045	1.90028	77.433	0.951	0.000614079	heating1	no noticable distortion	light brown	no		6.417	3.819	3.374	1.68602	84.0878	0.806	0.000479261	-0.197	0.334	0.0695	-0.214258	6.65482	-0.145	-0.000134818	-0.0297853	0.0958393	0.0210319	-0.152471
3	240	6.7065	3.5145	3.304	1.91234	78.4579	0.949	0.000604783	heating2	no noticable distortion	light brown	no		6.399	3.8215	3.442	1.6801	84.6994	0.754	0.000445104	-0.3075	0.307	0.138	-0.232238	6.2415	-0.195	-0.00015968	-0.045851	0.0873524	0.0417676	-0.205479
5	240	6.4955	3.4785	3.2305	1.87232	74.2693	0.921	0.000620041	heating2	slightly distorted	dark brown	no		5.6435	4.0725	3.413	1.39699	79.9506	0.596	0.00037273	-0.852	0.594	0.1825	-0.475322	5.68134	-0.325	-0.000247311	-0.131168	0.170763	0.0564928	-0.352877
1	250	6.7335	3.5835	3.3765	1.88215	82.042	0.987	0.000601521	heating1	no noticable distortion	light brown	no		6.3135	4.083	3.446	1.5531	89.5461	0.823	0.00045954	-0.42	0.4995	0.0695	-0.329053	7.50408	-0.164	-0.000141981	-0.0623747	0.139389	0.0205834	-0.16616
3	250	6.7675	3.5305	3.28	1.91979	78.9212	0.96	0.000608201	heating2	slightly distorted	dark brown	no		5.9215	4.285	3.5655	1.38883	91.0103	0	0	-0.846	0.7545	0.2855	-0.53096	12.0891	-0.96	-0.000608201	-0.125009	0.213709	0.0870427	-1
5	250	6.623	3.595	3.3195	1.84515	79.7172	0.988	0.000619691	heating2	medium distorted	dark brown	no		5.4905	4.2635	3.5315	1.29393	83.248	0.573	0.000344152	-1.1325	0.6685	0.212	-0.551214	3.53086	-0.415	-0.000275539	-0.170995	0.185953	0.063865	-0.42004
1	260	6.5035	3.5725	3.3595	1.82669	78.1873	1	0.00063949	heating2	no noticable distortion	light brown	no		6.0835	4.297	3.6255	1.43214	95.406	0.813	0.000426074	-0.42	0.7245	0.266	-0.394555	17.2187	-0.187	-0.000213416	-0.0645806	0.202799	0.0791784	-0.187
3	260	6.72	3.5665	3.3425	1.88808	80.2339	0.981	0.000611337	heating2	slightly distorted	dark brown	no		5.776	4.271	3.7005	1.35556	91.3784	0.604	0.000330494	-0.944	0.7045	0.358	-0.532519	11.1445	-0.377	-0.000280844	-0.140476	0.197533	0.107105	-0.384302
5	260	6.5015	3.43	3.257	1.89843	73.1468	0.881	0.000602214	heating2	slightly distorted	black	no		5.347	4.03	3.4025	1.33612	73.7861	0.509	0.000344916	-1.1545	0.6	0.1455	-0.562301	0.639353	-0.372	-0.000257298	-0.177574	0.174927	0.044673	-0.422247
1	270	6.7945	3.5915	3.3425	1.89423	82.1874	0.996	0.000605932	charring1	medium distorted	black	no		5.681	4.5625	3.8735	1.25316	101.231	0.724	0.000357599	-1.1135	0.971	0.531	-0.641071	19.0433	-0.272	-0.000248333	-0.163883	0.270361	0.158863	-0.273092
3	270	6.6945	3.593	3.4215	1.8644	82.6772	1.022	0.000618067	charring1	medium distorted	black	no		5.441	4.497	3.8765	1.21851	95.3919	0.578	0.000302961	-1.2535	0.904	0.455	-0.645882	12.7147	-0.444	-0.000315106	-0.187243	0.2516	0.132983	-0.434442
5	270	6.424	3.565	3.2065	1.8705	73.1795	0.893	0.000610143	charring2	medium distorted	black	no		5.069	4.0645	3.4535	1.25471	71.8716	0.476	0.000331146	-1.355	0.4995	0.247	-0.615795	-1.30796	-0.417	-0.000278997	-0.210928	0.140112	0.077031	-0.466965
1	280	6.7805	3.5445	3.454	1.91614	83.2644	1.002	0.000601698	charring1	medium distorted	black	no		5.634	4.5925	3.9085	1.23025	101.773	0.582	0.000285929	-1.1465	1.048	0.4545	-0.685892	18.5091	-0.42	-0.000315769	-0.169088	0.295669	0.131587	-0.419162
3	280	6.8555	3.6315	3.3475	1.89098	83.9784	0.984	0.000585865	charring1	medium distorted	black	no		5.1395	4.654	3.877	1.11294	93.4898	0.494	0.0002642	-1.716	1.0225	0.5295	-0.778044	9.51135	-0.49	-0.000321665	-0.25031	0.281564	0.158178	-0.497967
5	280	6.5855	3.3335	3.142	1.9818	69.8792	0.862	0.000616779	charring2	medium distorted	black	no		4.978	3.9815	3.3395	1.25607	67.0999	0.426	0.000317437	-1.6075	0.648	0.1975	-0.725725	-2.77924	-0.436	-0.000299342	-0.244097	0.19439	0.0628581	-0.5058
1	290	6.7495	3.453	3.291	1.96463	77.1511	0.923	0.000598177	charring2	medium distorted (protrusions)	black	yes		5.51158	4.67	3.86263	1.19507	99.5206	0.498	0.000263368	-1.23792	1.217	0.571632	-0.769553	22.3695	-0.425	-0.000334809	-0.183409	0.352447	0.173695	-0.460455
3	290	6.9925	3.779	3.557	1.85329	94.4146	1.028	0.000544408	charring2	medium distorted (protrusions)	black	yes		5.2855	4.436	3.8485	1.19354	90.9052	0.506	0.000278312	-1.707	0.657	0.2915	-0.659748	-3.50934	-0.522	-0.000266096	-0.244119	0.173856	0.0819511	-0.507782
5	290	6.3505	3.56	3.2395	1.84954	72.2729	0.874	0.000604653	charring2	identified by gorss morphology with some part clearly distorted	black	yes		4.55947	4.30158	3.50158	1.06817	68.6816	0.379	0.000290433	-1.79103	0.741579	0.262079	-0.781362	-3.5913	-0.495	-0.00031422	-0.282029	0.208309	0.080901	-0.566362
1	300	6.777	3.5395	3.4055	1.93084	82.0653	1.04	0.000633642	charring2	medium distorted (protrusions)	black	yes		5.684	4.662	3.9025	1.22025	103.873	0.551	0.000265228	-1.093	1.1225	0.497	-0.710585	21.8077	-0.489	-0.000368414	-0.161281	0.317135	0.14594	-0.470192
3	300	6.828	3.581	3.3705	1.90826	83.1039	1.007	0.000605868	charring2	medium distorted (protrusions)	black	yes		5.0785	4.39	3.823	1.16191	85.7642	0.481	0.00028042	-1.7495	0.809	0.4525	-0.746359	2.66024	-0.526	-0.000325448	-0.256224	0.225915	0.134253	-0.522344
5	300	6.4925	3.4275	3.218	1.89956	72.4157	0.907	0.000626245	charring2	unidentified and highly distorted (protrusions)	black	yes		4.6245	4.2715	3.738	1.08958	75.1	0.395	0.000262983	-1.868	0.844	0.52	-0.809982	2.68432	-0.512	-0.000363263	-0.287717	0.246244	0.161591	-0.564498
Mean		6.66617	3.54071	3.32236	1.89378	78.9999	0.95981	0.00060823						5.5275	4.28693	3.64311	1.30366	87.0388	0.550857	0.000319156	-1.13866	0.746218	0.320748	-0.590115	8.03889	-0.408952	-0.000289074	-0.170864	0.210756	0.0962653	-0.427602

## Sheet: Soybean
Time (h)	Temperature (℃)	Statistical results before charring							Charring condition					Statistical results after charring
		Length (mm)	Width (mm)	Thickness (mm)	L/W ratio	Volume (mm³)	Weight (g)	Density (g/mm³)	heating/charring class	preservation condition	color	shininess	Photo after charring	Length (mm)	Width (mm)	Thickness (mm)	L/W ratio	Volume (mm³)	Weight (g)	Density (g/mm³)	Length variation (mm)	Width variation (mm)	Thickness variation (mm)	L/W ratio variation	Volume variation (mm³)	Weight variation (g)	Density variation (g/mm³)	Shrinkage of length (%)	Shrinkage of Width (%)	Shrinkage of Thickness (%)	Shrinkage of weight (%)
1	240	6.8565	6.578	5.857	1.04504	139.715	3.46	0.00123823	heating1	slightly distorted (episperm cracking)	light brown	no		7.11684	6.47684	5.78263	1.10162	133.726	2.816	0.0010529	0.260342	-0.101158	-0.0743684	0.0565836	-5.98918	-0.644	-0.000185334	0.0379701	-0.0153782	-0.0126974	-0.186127
3	240	6.8545	6.7415	5.987	1.0174	146.165	3.585	0.00122635	heating2	slightly distorted (episperm cracking)	dark brown	no		6.9055	6.3465	5.481	1.08975	126.24	2.628	0.00104088	0.051	-0.395	-0.506	0.0723474	-19.9258	-0.957	-0.000185473	0.00744037	-0.0585923	-0.0845165	-0.266946
5	240	6.551	6.465	5.8395	1.01305	130.39	3.241	0.00124281	heating2	slightly distorted (episperm cracking)	dark brown	no		6.5795	6.206	5.479	1.05963	117.827	2.433	0.00103245	0.0285	-0.259	-0.3605	0.0465834	-12.5627	-0.808	-0.000210367	0.00435048	-0.0400619	-0.0617347	-0.249306
1	250	7.0485	6.7435	6.106	1.04567	153.125	3.762	0.00122841	heating2	slightly distorted (episperm cracking)	light brown	no		7.1795	6.6275	6.059	1.08402	151.72	2.975	0.000980424	0.131	-0.116	-0.047	0.0383487	-1.40504	-0.787	-0.000247983	0.0185855	-0.0172017	-0.00769735	-0.209197
3	250	6.986	6.119	6.792	1.1435	152.347	3.751	0.00123107	heating2	slightly distorted (episperm cracking)	dark brown	no		7.079	6.308	5.8475	1.12281	136.884	2.645	0.000966149	0.093	0.189	-0.9445	-0.0206932	-15.4633	-1.106	-0.000264923	0.0133123	0.0308874	-0.139061	-0.294855
5	250	6.725	6.5495	5.8455	1.02738	135.602	3.366	0.00124113	heating2	medium distorted	dark brown	no		6.8055	6.0845	5.46	1.11977	118.873	2.305	0.000969519	0.0805	-0.465	-0.3855	0.0923895	-16.7288	-1.061	-0.000271611	0.0119703	-0.0709978	-0.0659482	-0.315211
1	260	7.182	6.9085	6.1725	1.04007	161.068	3.958	0.00122867	charring1	slightly distorted (episperm cracking)	dark brown	no		7.339	6.732	5.95	1.09015	154.666	2.949	0.000953344	0.157	-0.1765	-0.2225	0.0500716	-6.40207	-1.009	-0.000275328	0.0218602	-0.0255482	-0.036047	-0.254927
3	260	6.796	6.7575	6.1165	1.00695	147.893	3.637	0.0012296	charring1	slightly distorted (episperm cracking)	dark brown	no		7.0635	6.087	5.7165	1.16238	129.62	2.426	0.000935813	0.2675	-0.6705	-0.4	0.15543	-18.2734	-1.211	-0.000293789	0.0393614	-0.0992231	-0.0653969	-0.332967
5	260	6.7875	6.6595	5.9405	1.01909	141.812	3.528	0.0012439	charring1	slightly distorted (episperm cracking)	black	no		6.9615	6.1405	5.5	1.13557	124.014	2.323	0.000936585	0.174	-0.519	-0.4405	0.116489	-17.7973	-1.205	-0.000307318	0.0256354	-0.0779338	-0.074152	-0.341553
1	270	6.904	6.7695	6.15	1.01989	151.116	3.709	0.00122721	charring1	slightly distorted (episperm cracking)	black	no		7.039	6.4595	5.905	1.0907	140.889	2.738	0.000971687	0.135	-0.31	-0.245	0.0708122	-10.2266	-0.971	-0.000255519	0.0195539	-0.0457936	-0.0398374	-0.261796
3	270	6.8705	6.7645	6.0425	1.01635	147.517	3.632	0.00123105	charring1	medium distorted	black	yes		7.723	6.196	5.9345	1.2476	149.261	2.307	0.000772806	0.8525	-0.5685	-0.108	0.23125	1.74468	-1.325	-0.000458242	0.124081	-0.0840417	-0.0178734	-0.364813
5	270	6.628	6.527	5.803	1.01688	132.046	3.25	0.00123063	charring1	medium distorted	black	yes		7.183	6.034	5.7975	1.19718	132.333	2.016	0.000761715	0.555	-0.493	-0.0055	0.180295	0.286763	-1.234	-0.000468915	0.0837357	-0.0755324	-0.000947786	-0.379692
1	280	6.837	6.6875	5.993	1.02413	144.306	3.527	0.00122206	charring1	medium distorted	black	no		7.1735	6.303	5.713	1.14232	135.711	2.508	0.000924022	0.3365	-0.3845	-0.28	0.118188	-8.59482	-1.019	-0.000298035	0.0492175	-0.0574953	-0.0467212	-0.288914
3	280	7.0575	6.7595	6.101	1.04439	153.22	3.714	0.00121198	charring1	medium distorted	black	no		8.0135	6.3275	6.00684	1.26685	159.598	2.323	0.000766069	0.956	-0.432	-0.0941579	0.222457	6.3778	-1.391	-0.000445912	0.135459	-0.0639101	-0.0154332	-0.374529
5	280	6.7005	6.621	5.9435	1.01188	139.192	3.421	0.00122888	charring1	medium distorted	black	yes		7.59818	6.16	5.90727	1.23619	146.218	1.955	0.00121549	0.897682	-0.461	-0.0362273	0.224314	7.02648	-1.466	-1.3387e-05	0.133972	-0.0696269	-0.00609528	-0.42853
1	290	6.889	6.7825	6.07	1.01567	150.006	3.754	0.00125128	charring1	medium distorted	black	yes		7.519	6.4595	5.7165	1.16745	145.9	2.523	0.000864631	0.63	-0.323	-0.3535	0.151772	-4.10538	-1.231	-0.000386654	0.0914501	-0.0476226	-0.0582372	-0.327917
3	290	7.258	6.979	6.234	1.04131	166.318	3.653	0.0010982	charring1	medium distorted	black	yes		8.4635	6.47667	6.24842	1.30954	175.712	2.021	0.000638988	1.2055	-0.502333	0.0144211	0.268224	9.39395	-1.632	-0.00045921	0.166093	-0.0719778	0.00231329	-0.446756
5	290	6.6305	6.4335	5.743	1.03136	129.058	3.204	0.0012413	charring1	medium distorted	black	yes		7.593	5.963	5.7835	1.27856	138.393	1.807	0.000652849	0.9625	-0.4705	0.0405	0.247198	9.33556	-1.397	-0.000588455	0.145163	-0.0731328	0.00705206	-0.436017
1	300	6.7245	6.641	5.883	1.013	138.217	3.486	0.00126106	charring1	medium distorted	black	yes		8.3515	6.542	6.017	1.27997	172.525	2.167	0.000628027	1.627	-0.099	0.134	0.266973	34.3077	-1.319	-0.000633035	0.241951	-0.0149074	0.0227775	-0.378371
3	300	6.8105	6.5355	5.9065	1.04303	138.264	3.4	0.00122953	charring2	identified by gorss morphology with some part clearly distorted	black	yes		8.24333	6.552	6.21267	1.26457	175.46	1.831	0.000695697	1.43283	0.0165	0.306167	0.221547	37.1959	-1.569	-0.000533838	0.210386	0.00252467	0.0518355	-0.461471
5	300	6.731	6.687	5.7085	1.00816	139.238	3.582	0.00128628	charring2	identified by gorss morphology with some part clearly distorted	black	yes		8.28105	6.40579	6.48579	1.29565	180.812	1.922	0.000559466	1.55005	-0.281211	0.777289	0.287489	41.5732	-1.66	-0.000726818	0.230286	-0.0420533	0.136164	-0.463428
Mean		6.84895	6.65283	6.01117	1.03068	144.601	3.55333	0.00122998						7.43864	6.32799	5.85732	1.1782	145.066	2.36276	0.000872357	0.589686	-0.324843	-0.153851	0.147527	0.465122	-1.19057	-0.000357626	0.0862778	-0.048458	-0.0243931	-0.336349
